# Supplementary material for: The genetic factors of bilaterian evolution
Source: eLife journal article supplement (doi:10.7554/elife.45530), 2020-07-16

# OG\_26631

397056|trs\_comp36659\_c0\_seq1\_5\_0  
397056|trs\_comp40002\_c0\_seq1\_6\_0  
114398|orf\_AOMJ01130257.1\_24\_0  
114398|orf\_AOMJ01130257.1\_6\_0  
126957|orf\_AFFK01023782.1\_1321\_1  
126957|orf\_AFFK01023782.1\_1320\_0  
126957|predict\_SMAR012698-PA\_0  
6669|gi\_321459105  
6689|trs\_JP374761.1\_10\_0  
6689|trs\_JP407124.1\_9\_0  
7029|gi\_328704000  
7070|gi\_270014982  
7070|orf\_AAJO1000177.1\_356\_0  
7091|gi\_512920489  
7159|gi\_108883669  
7176|gi\_167866035  
7213|gi\_498971489  
7217|gi\_190624952  
7222|gi\_193896914  
7227|gi\_17945509  
7230|gi\_193918503  
7234|gi\_194108331  
7244|gi\_194153409  
7260|gi\_194158422  
77166|gi\_478257374  
7370|gi\_557764076  
7370|gi\_557764061  
13037|gi\_357627396  
13686|gi\_322790257  
43151|gi\_568248647  
180454|gi\_333407725  
103372|gi\_332018129  
104421|gi\_307180283  
121224|gi\_212513892  
121224|gi\_212513893  
116143|trs\_comp19499\_c0\_seq1\_9\_0

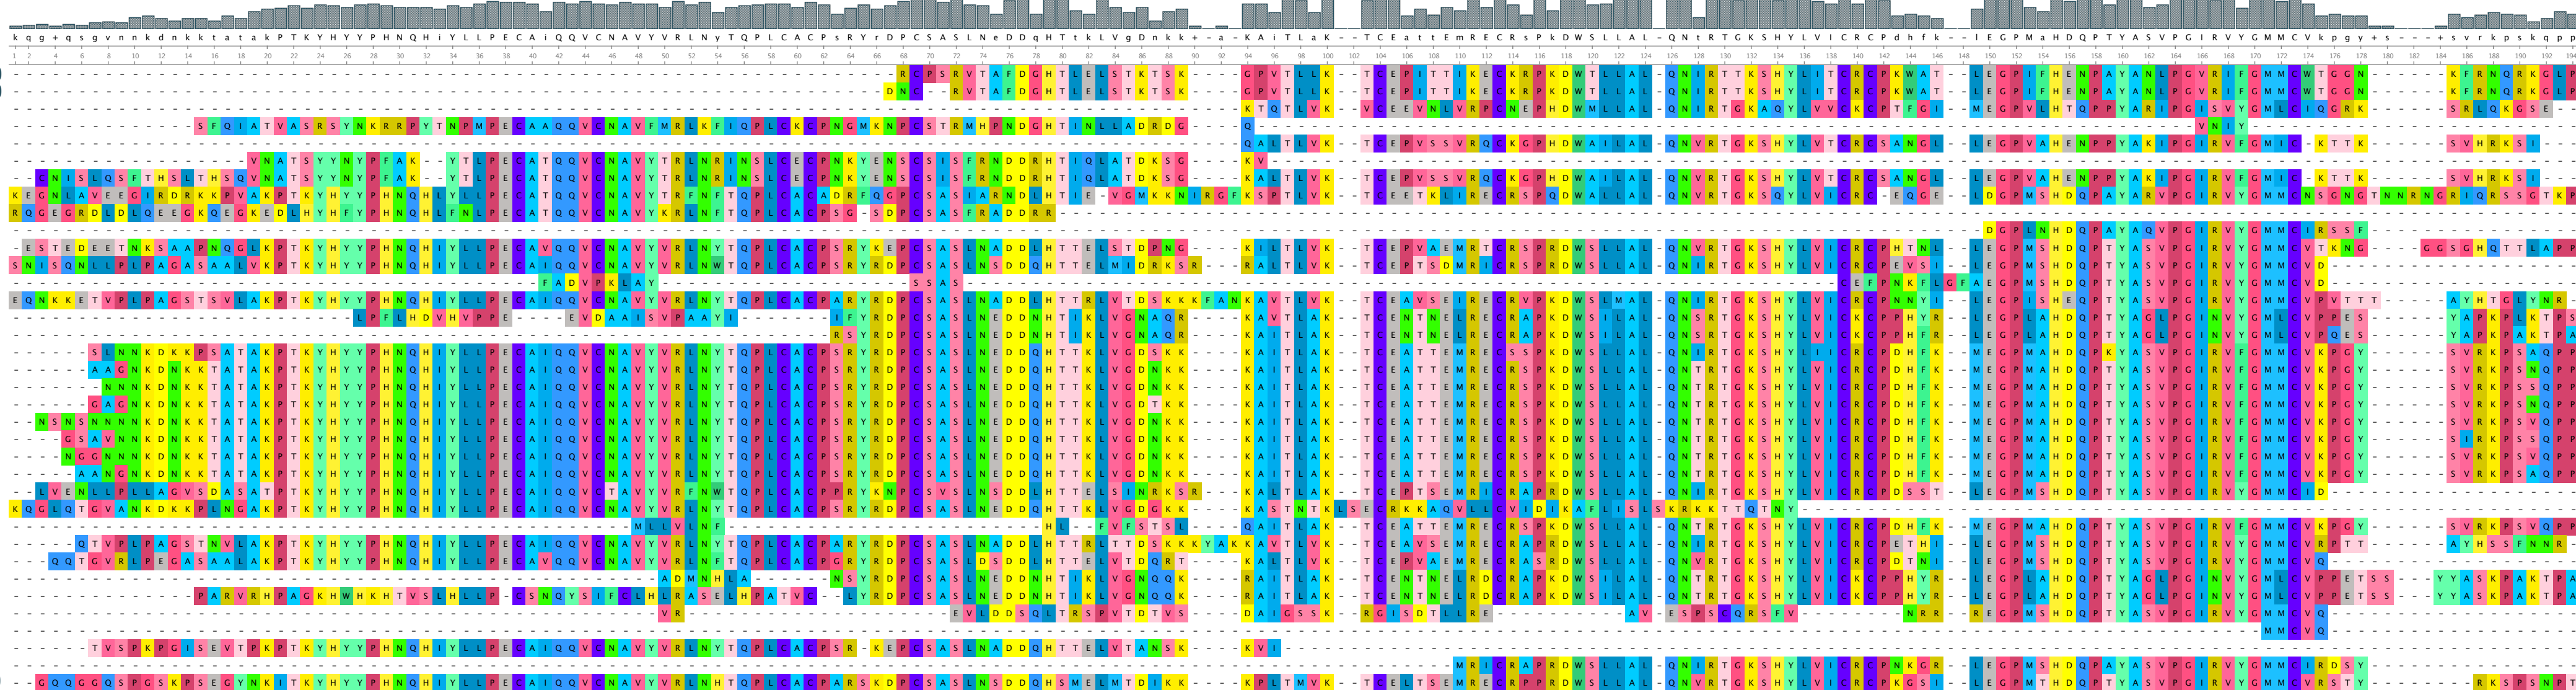

# OG\_34551

6850|trs\_comp8469\_c0\_seq1\_4\_0  
397056|trs\_comp19522\_c0\_seq7\_10\_0  
1401006|trs\_comp28384\_c0\_seq1\_3\_0  
114398|orf\_AOMJ01169075.1\_588\_0  
126957|predict\_SMAR000888-PA\_0  
6669|gi\_321471793  
6689|trs\_JP388460.1\_2\_0  
7091|gi\_95102736  
7222|gi\_193903294  
77166|gi\_478260135  
7070|gi\_189234888  
7227|gi\_7291306  
7260|gi\_194162328  
7159|gi\_108874004  
7176|gi\_167880316  
7213|gi\_498937375  
7217|gi\_190620646  
7230|gi\_193910482  
7244|gi\_194145508  
7370|gi\_557753376  
13037|gi\_357615444  
43151|gi\_568259225  
7159|gi\_108874005  
116143|trs\_comp59123\_c0\_seq1\_26\_0  
116143|trs\_comp59097\_c0\_seq1\_6\_0  
121224|gi\_212517362  
158441|trs\_gi\_570624544\_gb\_GAMN01000581.1\_1\_0  
180454|gi\_116132448

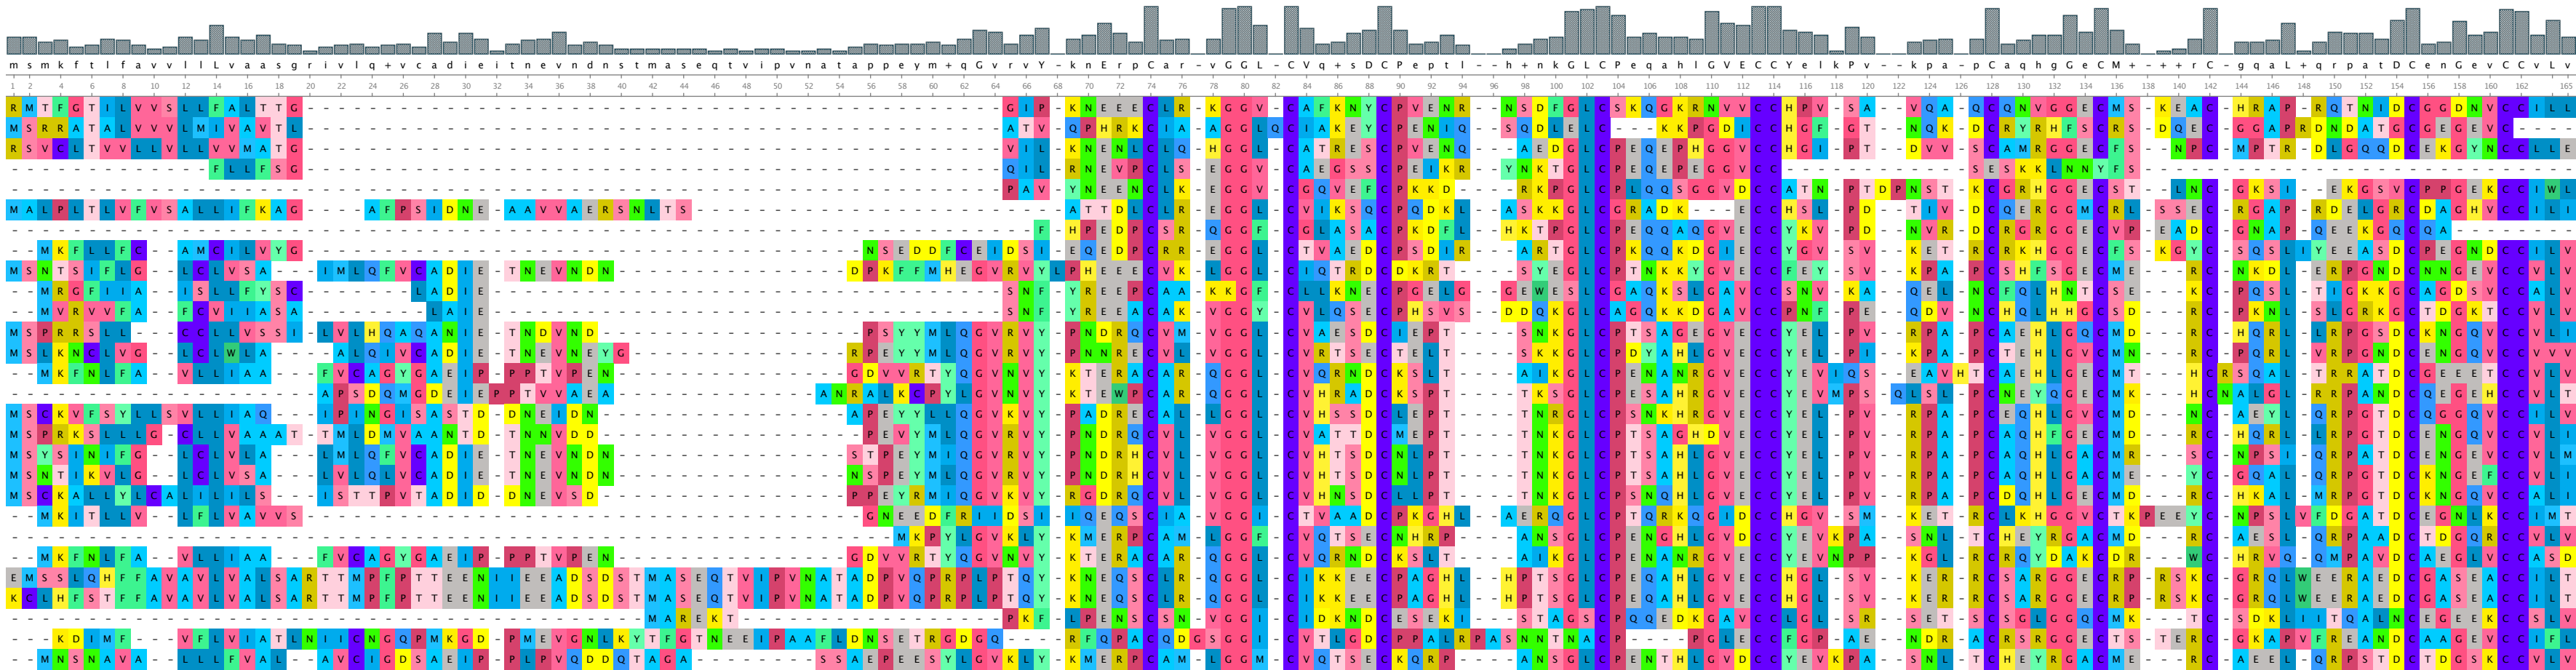

# OG\_35928

397056|trs\_comp18697\_c0\_seq1\_5\_0  
397056|trs\_comp20284\_c2\_seq1\_22\_0  
1391732|trs\_comp15116\_c4\_seq7\_28\_0  
7070|orf\_AAJO1002927.1\_308\_0  
7091|gi\_512929206  
7159|gi\_108678833  
7070|gi\_189239989  
7176|gi\_167863091  
7213|gi\_498923977  
7217|gi\_190621358  
7222|gi\_193899382  
7227|gi\_16769732  
7234|gi\_194118063  
7244|gi\_194143938  
7260|gi\_194159907  
7370|gi\_557753330  
77166|gi\_478257743  
13037|gi\_357625379  
43151|gi\_568257998  
180454|gi\_157019564  
610380|gi\_307214284  
103372|gi\_332019681  
104421|gi\_307179301  
158441|trs\_gi\_570623604\_gb\_GAMN01001521.1\_3\_0  
114398|orf\_AOMJ01124192.1\_28\_0  
116143|trs\_comp54165\_c0\_seq1\_6\_0  
7260|gi\_194163731

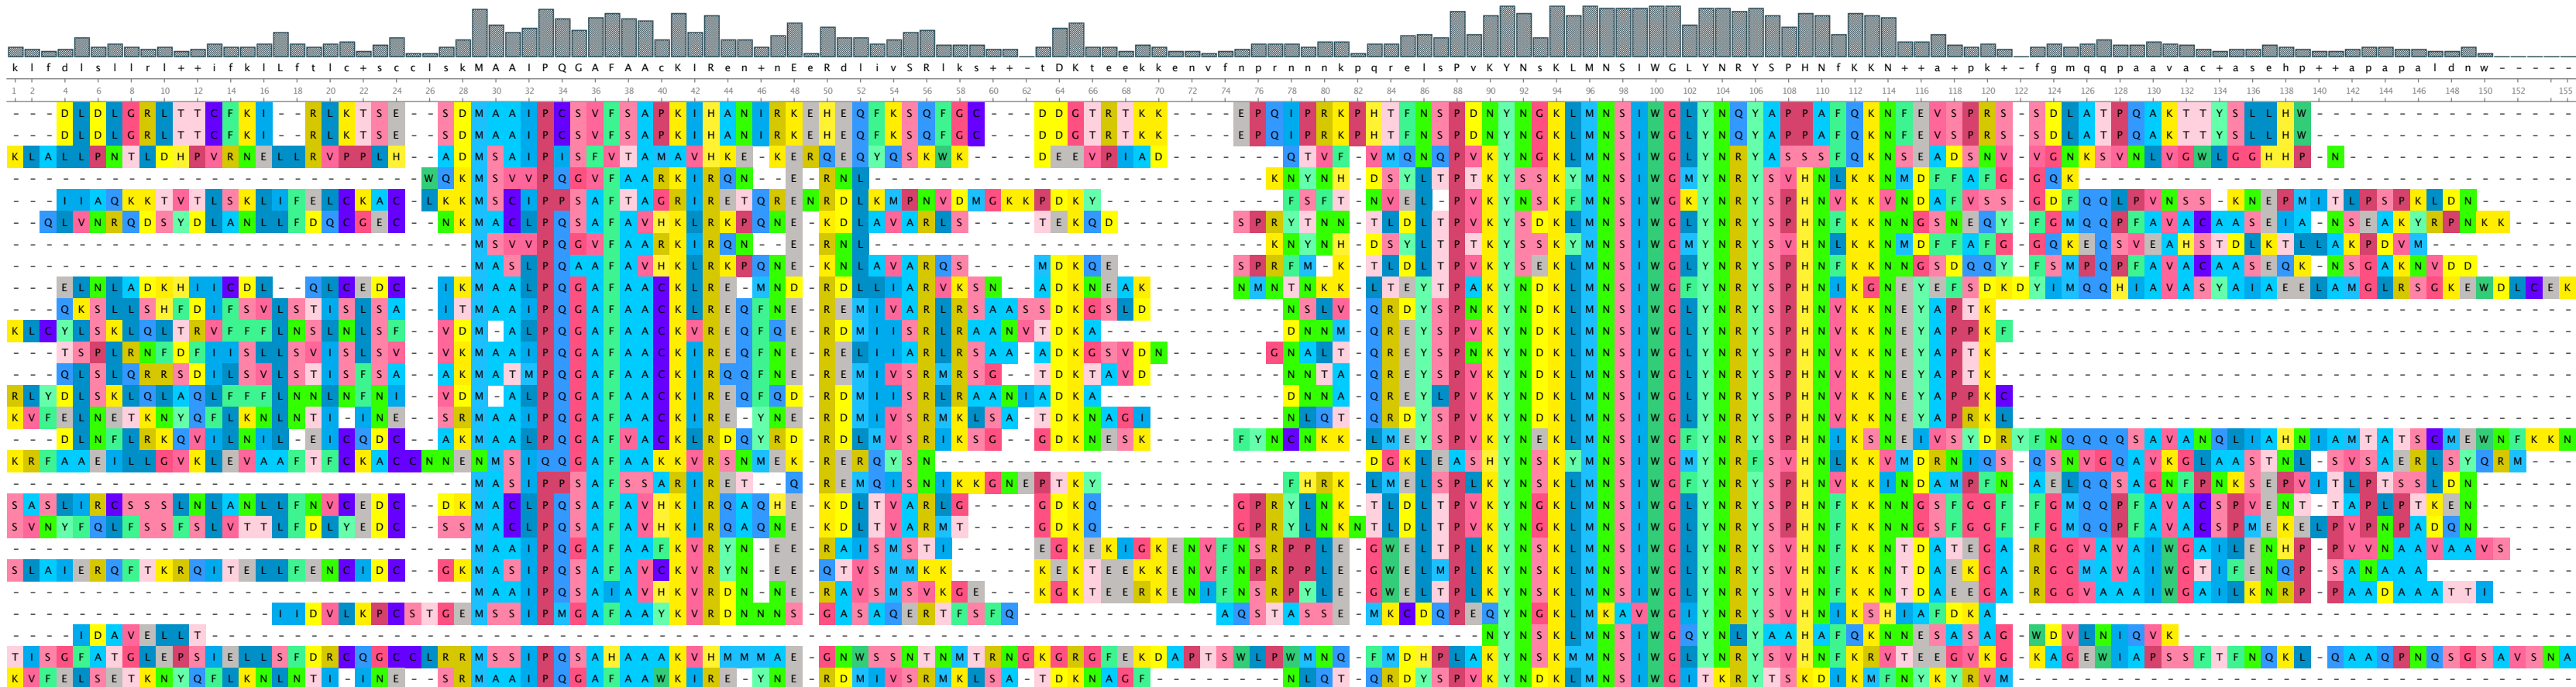

Supplement: supp [file elife_poa_e45530_Figure_4_figure_supplement_1.pdf › elife_poa_e45530_Figure_4_figure_supplement_1.pdf]
