# Supplementary material for: The genetic factors of bilaterian evolution
Source: eLife journal article supplement (doi:10.7554/elife.45530), 2020-07-16

# OG\_13336

6500|gi\_524901068  
6523|trs\_gi\_399801232\_dbj\_FX199461.1\_1\_0  
6579|trs\_gi\_630133598\_gb\_GAOX01014982.1\_1\_0  
259844|trs\_comp43515\_c0\_seq1\_9\_0  
29159|orf\_AFTI01013947.1\_203\_0  
77166|gi\_478252415  
6945|gi\_215504518  
72036|trs\_gi\_347683702\_gb\_JP348067.1\_1\_0  
6689|trs\_JP431320.1\_4\_0  
397056|trs\_comp48045\_c0\_seq1\_2\_0  
1401006|trs\_comp17860\_c0\_seq1\_27\_0  
114398|orf\_AOMJ01191305.1\_78\_0  
114398|orf\_AOMJ01191306.1\_33\_0  
37621|orf\_AXZU010147099.1\_164\_0  
126957|predict\_SMAR011330.PA.0  
126957|orf\_AAFK01022900.1\_19\_0  
126957|orf\_AFFK01022900.1\_23\_0  
7070|gi\_270055407  
121224|gi\_212516789  
7955|gi\_189524320  
7955|gi\_528510919  
7668|gi\_390347879  
7868|predict\_SINCAAMP0000020970.0  
7868|orf\_AAVX02000017.1\_347\_0  
7868|orf\_AAVX02000017.1\_319\_0  
7897|gi\_556984466  
7897|orf\_BAHO01394876.1\_55\_0  
7897|orf\_BAHO01394877.1\_14\_0  
7918|gi\_573874712  
8083|gi\_551502064  
8083|gi\_551503968  
8083|gi\_551503989  
8128|gi\_348538388  
8364|gi\_301609918  
8478|gi\_530642612  
8839|gi\_514748915  
8932|gi\_543735568  
9361|gi\_488551432  
9371|gi\_507687777  
9606|orf\_chrl1\_462244\_0  
9606|orf\_chrl1\_1901177\_0  
9606|gi\_119590351  
9606|gi\_37589863  
9669|gi\_511913517  
9669|gi\_512004382  
9785|gi\_344278515  
9796|gi\_545182105  
9823|gi\_335307237  
9823|gi\_311271176  
9978|gi\_504132636  
10029|gi\_354468888  
10141|gi\_348575512  
10181|gi\_512896463  
10224|gi\_291221401  
13616|gi\_126307255  
13616|gi\_334347659  
13735|gi\_558157504  
31033|gi\_410925675  
31192|trs\_comp82287\_c0\_seq2\_4\_0  
34839|gi\_533140632  
42254|gi\_505853885  
43179|gi\_532069279  
46514|trs\_comp96028\_c0\_seq3\_68\_0  
51337|gi\_507551770  
59588|gi\_556781093  
63121|trs\_comp14024\_c0\_seq1\_3\_0  
109478|gi\_554030655  
137513|trs\_comp86115\_c0\_seq1\_5\_0  
143302|gi\_507972666  
246437|gi\_444724512  
307972|trs\_comp140960\_c0\_seq1\_12\_0  
307972|trs\_comp148633\_c0\_seq1\_4\_0  
397056|trs\_comp50910\_c0\_seq1\_15\_0  
419612|gi\_528762292

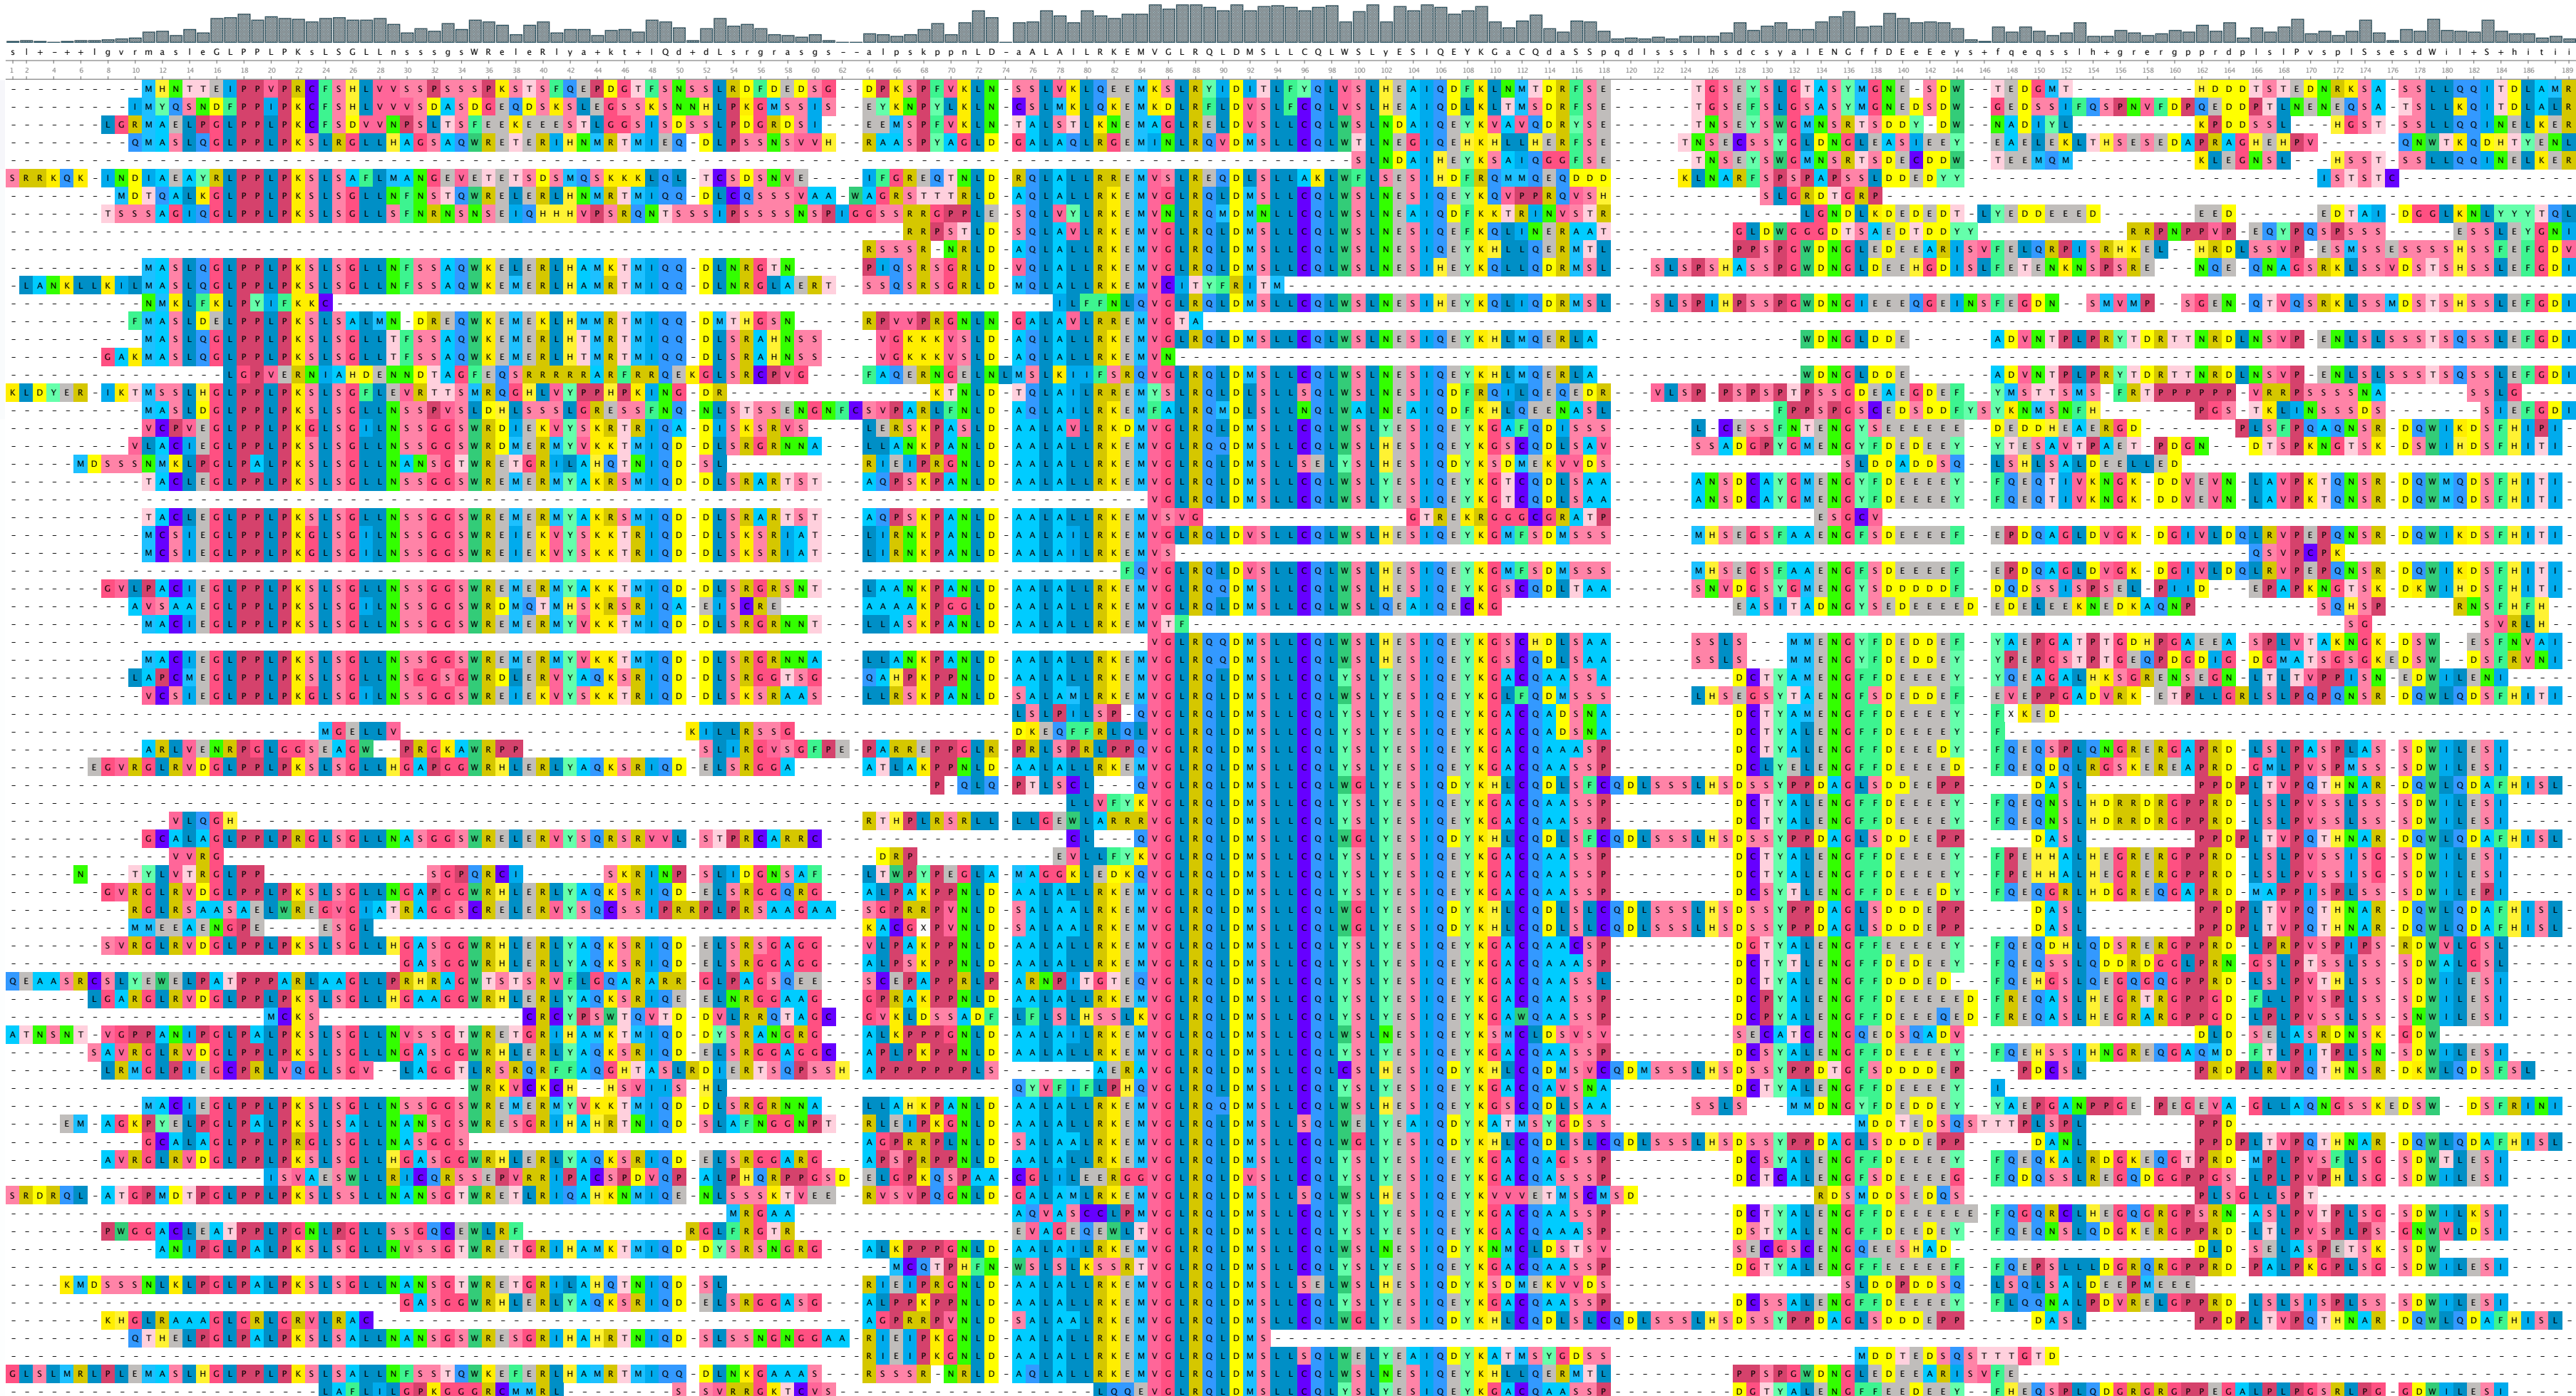

# OG\_31055

283909|orf\_AMQN01014547.1\_1068\_0  
29159|orf\_AFTI01025555.1\_788\_0  
6412|orf\_AMQM01005650.1\_2781\_0  
259844|trs\_comp145532\_c0\_seq1\_6\_0  
452200|trs\_comp91927\_c0\_seq3\_7\_0  
452200|trs\_comp283915\_c0\_seq1\_6\_0  
225164|orf\_AMQO01000685.1\_2028\_0  
256108|trs\_comp105309\_c0\_seq1\_3\_0  
256108|trs\_comp151238\_c0\_seq1\_2\_0  
7070|orf\_AAJJ01002276.1\_160\_0  
1391732|trs\_comp80616\_c0\_seq1\_13\_0  
397056|trs\_comp15747\_c1\_seq1\_45\_0  
1401006|trs\_comp26156\_c0\_seq1\_16\_0  
114398|orf\_AOMJ01122522.1\_363\_0  
114398|orf\_AOMJ01142973.1\_771\_0  
37621|orf\_AXZU01030786.1\_63\_0  
7668|orf\_AAGJ04082864.1\_71\_0  
7668|orf\_AAGJ04129973.1\_11\_0  
7668|orf\_AAGJ04151672.1\_295\_0  
7668|orf\_AAGJ04174555.1\_310\_0  
7668|orf\_AAGJ0415077.1\_82\_0  
7897|orf\_BAHO01400808.1\_327\_0  
10224|orf\_ACQM01041101.1\_12\_0  
63121|trs\_comp21300\_c0\_seq1\_2\_0  
307972|trs\_comp28131\_c0\_seq1\_5\_0  
307972|trs\_comp26834\_c0\_seq1\_2\_0  
31192|trs\_comp79342\_c0\_seq1\_22\_0  
137513|trs\_comp75637\_c0\_seq20\_4\_0  
137513|trs\_comp82302\_c0\_seq1\_12\_0  
137513|trs\_comp59583\_c0\_seq3\_48\_0

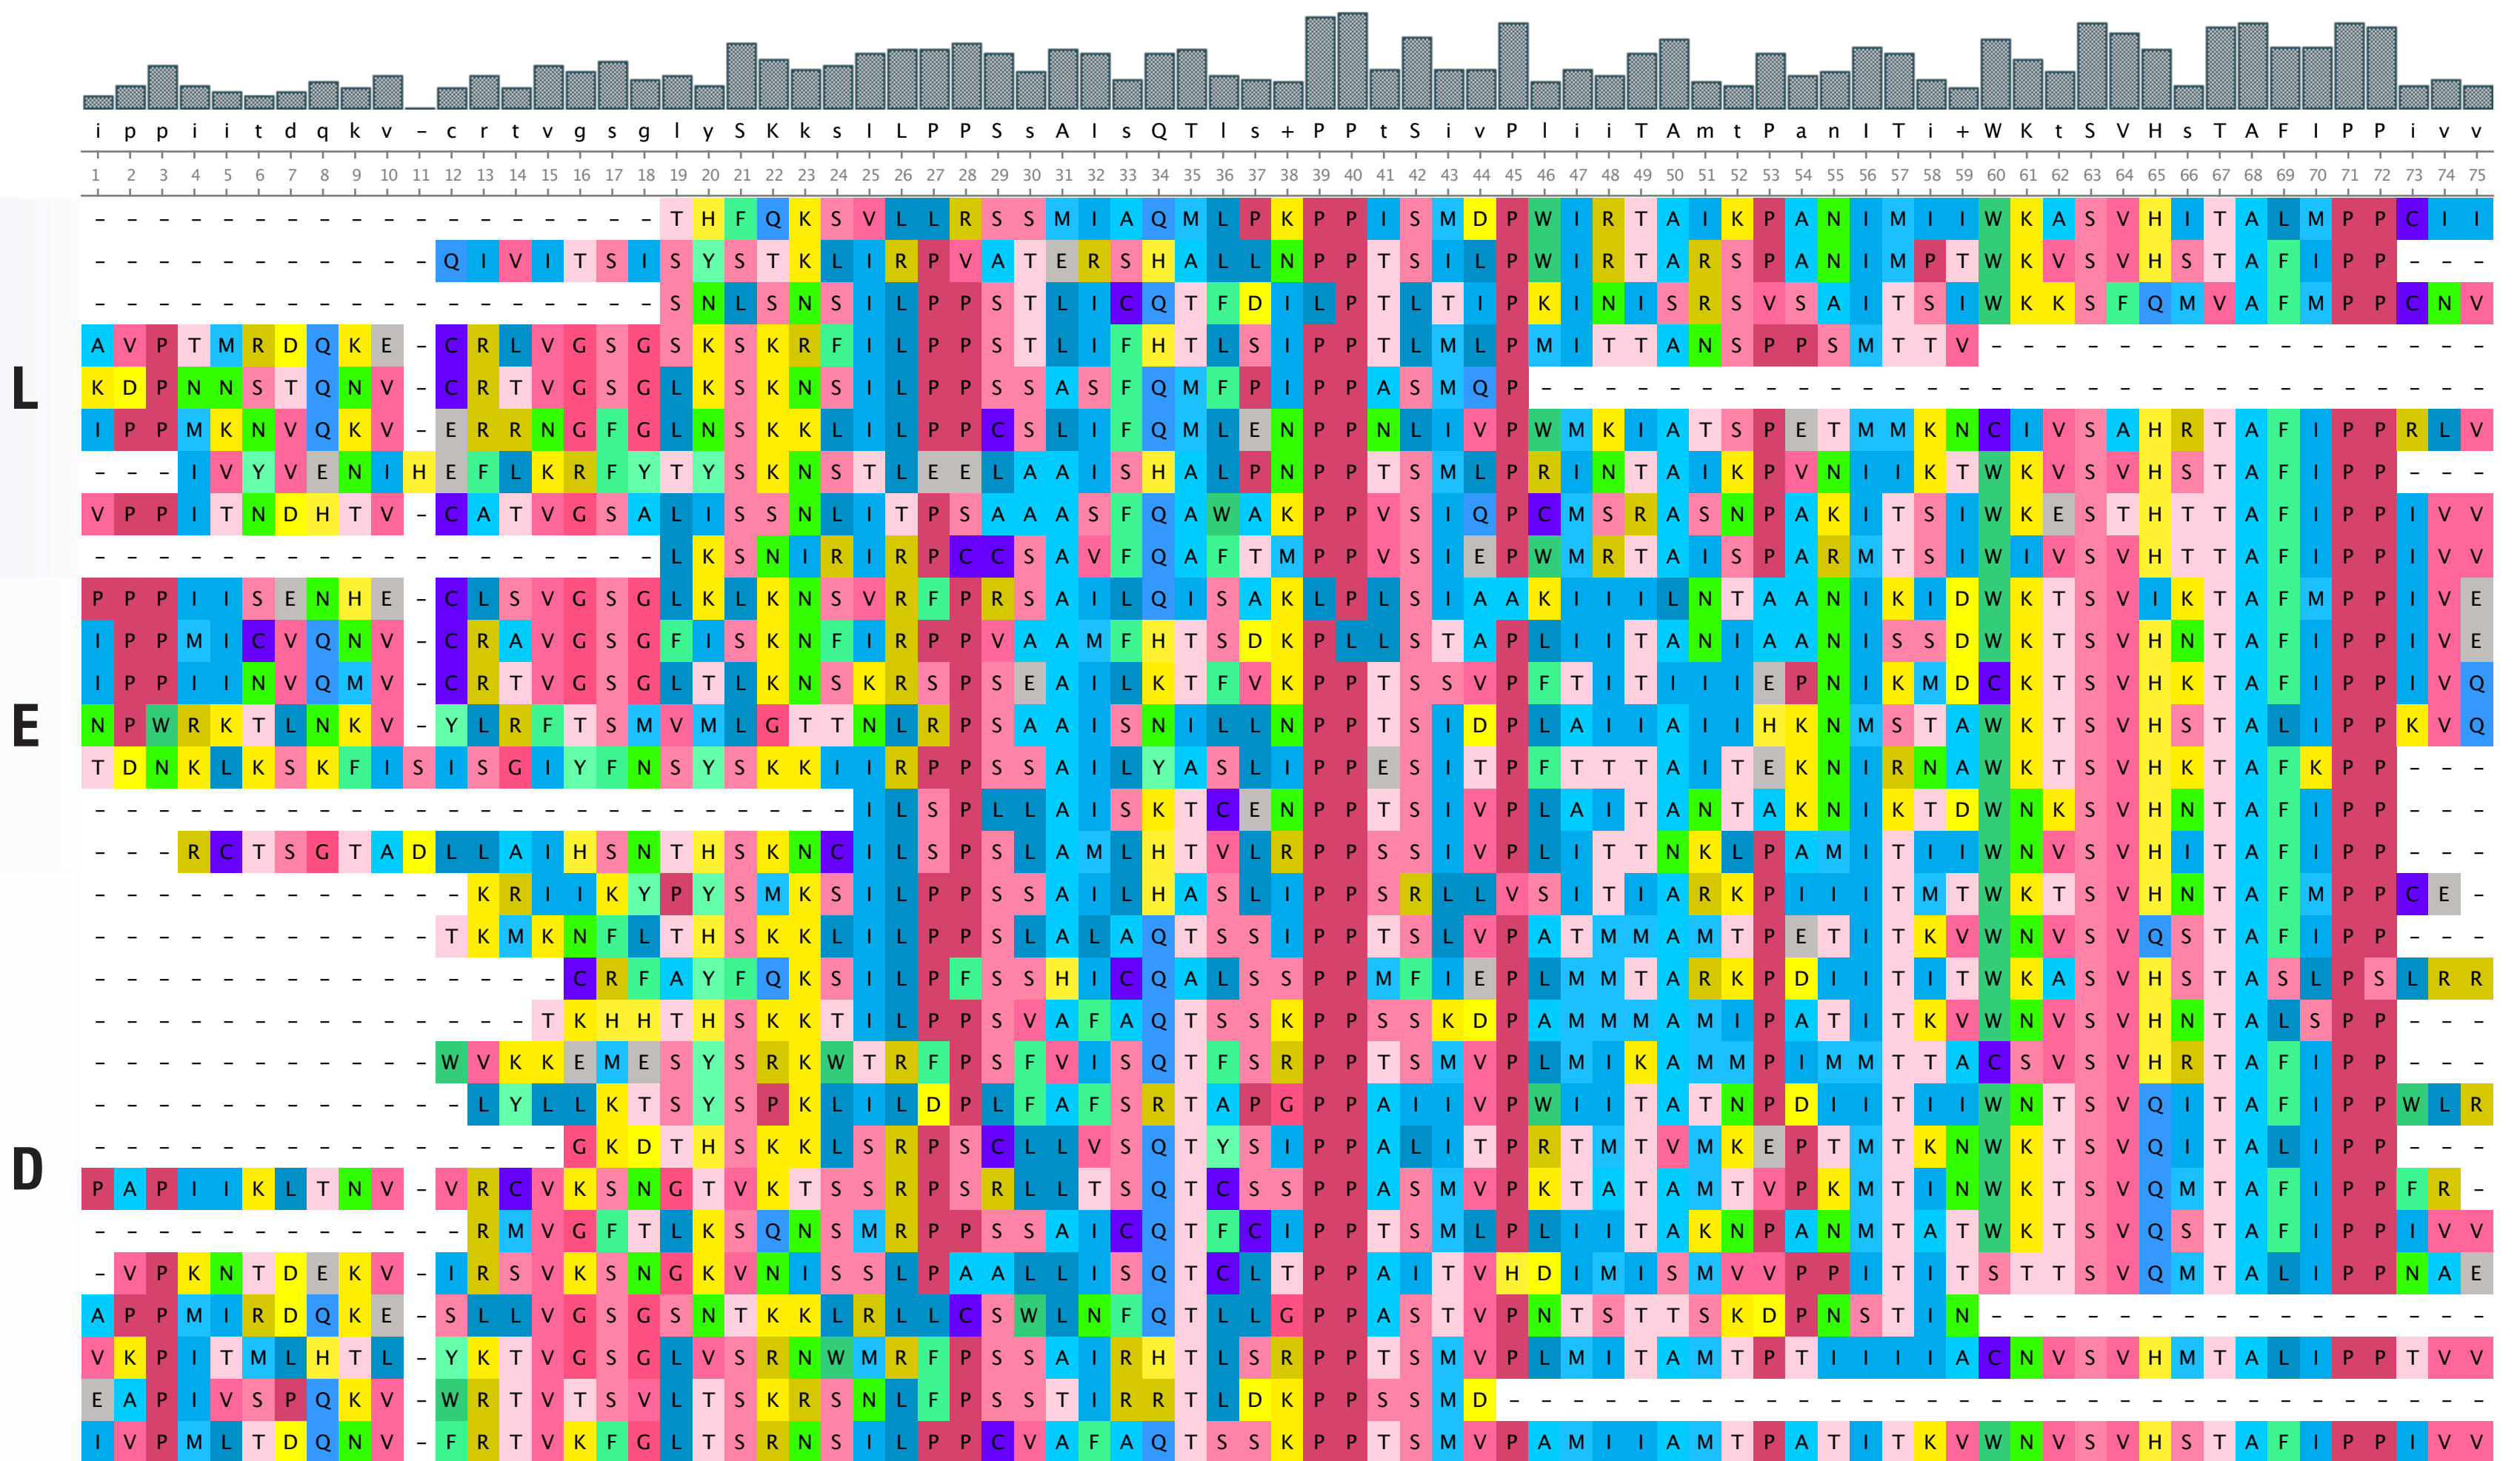

Supplement: supp [file elife_poa_e45530_Figure_2_figure_supplement_3.pdf › elife_poa_e45530_Figure_2_figure_supplement_3.pdf]
