# Supplementary material for: The genetic factors of bilaterian evolution
Source: eLife journal article supplement (doi:10.7554/elife.45530), 2020-07-16

|                                                                                    |
|------------------------------------------------------------------------------------|
| ROBO1_HUMAN                                                                        |
| ROBO1_MOUSE                                                                        |
| F1N739_BOVIN (Robo1)                                                               |
| F6WF30_XENTR (Xenopus_tropicalis_Robo1)                                            |
| H3A0E4_LATCH (Latimeria_chalumnae_Robo1)                                           |
| Q98SW4_DANRE (Danio_rerio_Robo1)                                                   |
| F7A854_XENTR (Xenopus_tropicalis_Robo3)                                            |
| ROBO3_MOUSE (Mus_musculus_Robo3)                                                   |
| ROBO3_HUMAN (Homo_sapiens_Robo3)                                                   |
| A8DZ85_DANRE (Danio_rerio_Robo3)                                                   |
| A0A1A7ZE47_NOTFU (Nothobranchius_furzeri_Robo3)                                    |
| Q90Z70_DANRE (Danio_rerio_Robo2)                                                   |
| A0A1A8VH07_NOTFU (Nothobranchius_furzeri_Robo2)                                    |
| A0A024B7I3_CHICK (Gallus_gallus_Robo2)                                             |
| ROBO2_MOUSE                                                                        |
| ROBO2_HUMAN                                                                        |
| XP_014348835.1 (Latimeria_chalumnae_Robo2)                                         |
| XP_014341142.1 (Latimeria_chalumnae_Robo3)                                         |
| XP_007901766.1 (Callorhinchus_milii_Robo3)                                         |
| XP_007901768.1 (Callorhinchus_milii_Robo2)                                         |
| XP_019918618.1 (Crassostrea_gigas_Robo2)                                           |
| XP_021346438.1 (Mizuhopecten_yessoensis_Robo1)                                     |
| XP_009022908.1 (Helobdella_robusta_Robo1)                                          |
| XP_013411532.1 (Lingula_anatina_Robo)                                              |
| PVD27655.1 (Pomacea_canaliculata_Robo)                                             |
| XP_014780176.1 (Octopus_bimaculoides_Robo)                                         |
| XP_020306649.1 (Loa_loa_Robo1)                                                     |
| EGT30595.1 (Caenorhabditis_brenneri_Sax3)                                          |
| CDW53265.1 (Trichuris_trichiura_Robo2)                                             |
| KRX96228.1 (Trichinella_pseudospiralis_sax-3)                                      |
| O44924_DROME (Drosophila_melanogaster_Robo1)                                       |
| EAT43561.1 (Aedes_aegypti_Robo1)                                                   |
| XP_015833610.1 (Tribolium_castaneum_Robo1)                                         |
| XP_023708253.1 (Cryptotermes_secundus_Robo1)                                       |
| XP_022186783.1 (Nilaparvata_lugens_Robo)                                           |
| XP_003427853.1 (Nasonia_vitripennis_Robo)                                          |
| XP_011643498.1 (Pogonomyrmex_barbatus_Robo)                                        |
| XP_022253078.1 (Limulus_polyphemus_Robo1)                                          |
| XP_021003793.1 (Parasteatoda_tepidariorum_Robo)                                    |
| PSN32273.1 (Blattella_germanica_Robo)                                              |
| XP_021964012.1 (Folsomia_candida_Robo)                                             |
| XP_020899238.1 (Exaiptasia_pallida_Robo1)                                          |
| XP_020899232.1 (Exaiptasia_pallida_Robo1)                                          |
| XP_020628560.1 (Orbicella_faveolata_Robo1)                                         |
| XP_022791265.1 (Stylophora_pistillata_Robo1)                                       |
| XP_022791250.1 (Stylophora_pistillata_Robo1)                                       |
| 6130 trs_gi_584494466_gb_GASU01085072.1__20_0 (Acropora_cervicornis_Robo)          |
| 51061 trs_gi_576835967_dbj_FX452320.1__22_0 (Porites_australiensis_Robo)           |
| XP_012556570.1 (Hydra_vulgaris_predicted_Robo)                                     |
| 13093 trs_gi_645841006_gb_GAWH01052120.1__2_0 (Hydractinia_symbiolongicarpus_Robo) |
| 168759 trs_comp64794_c0_seq2_21_0 (Nanomia_bijuga_Robo)                            |

Cnidaria

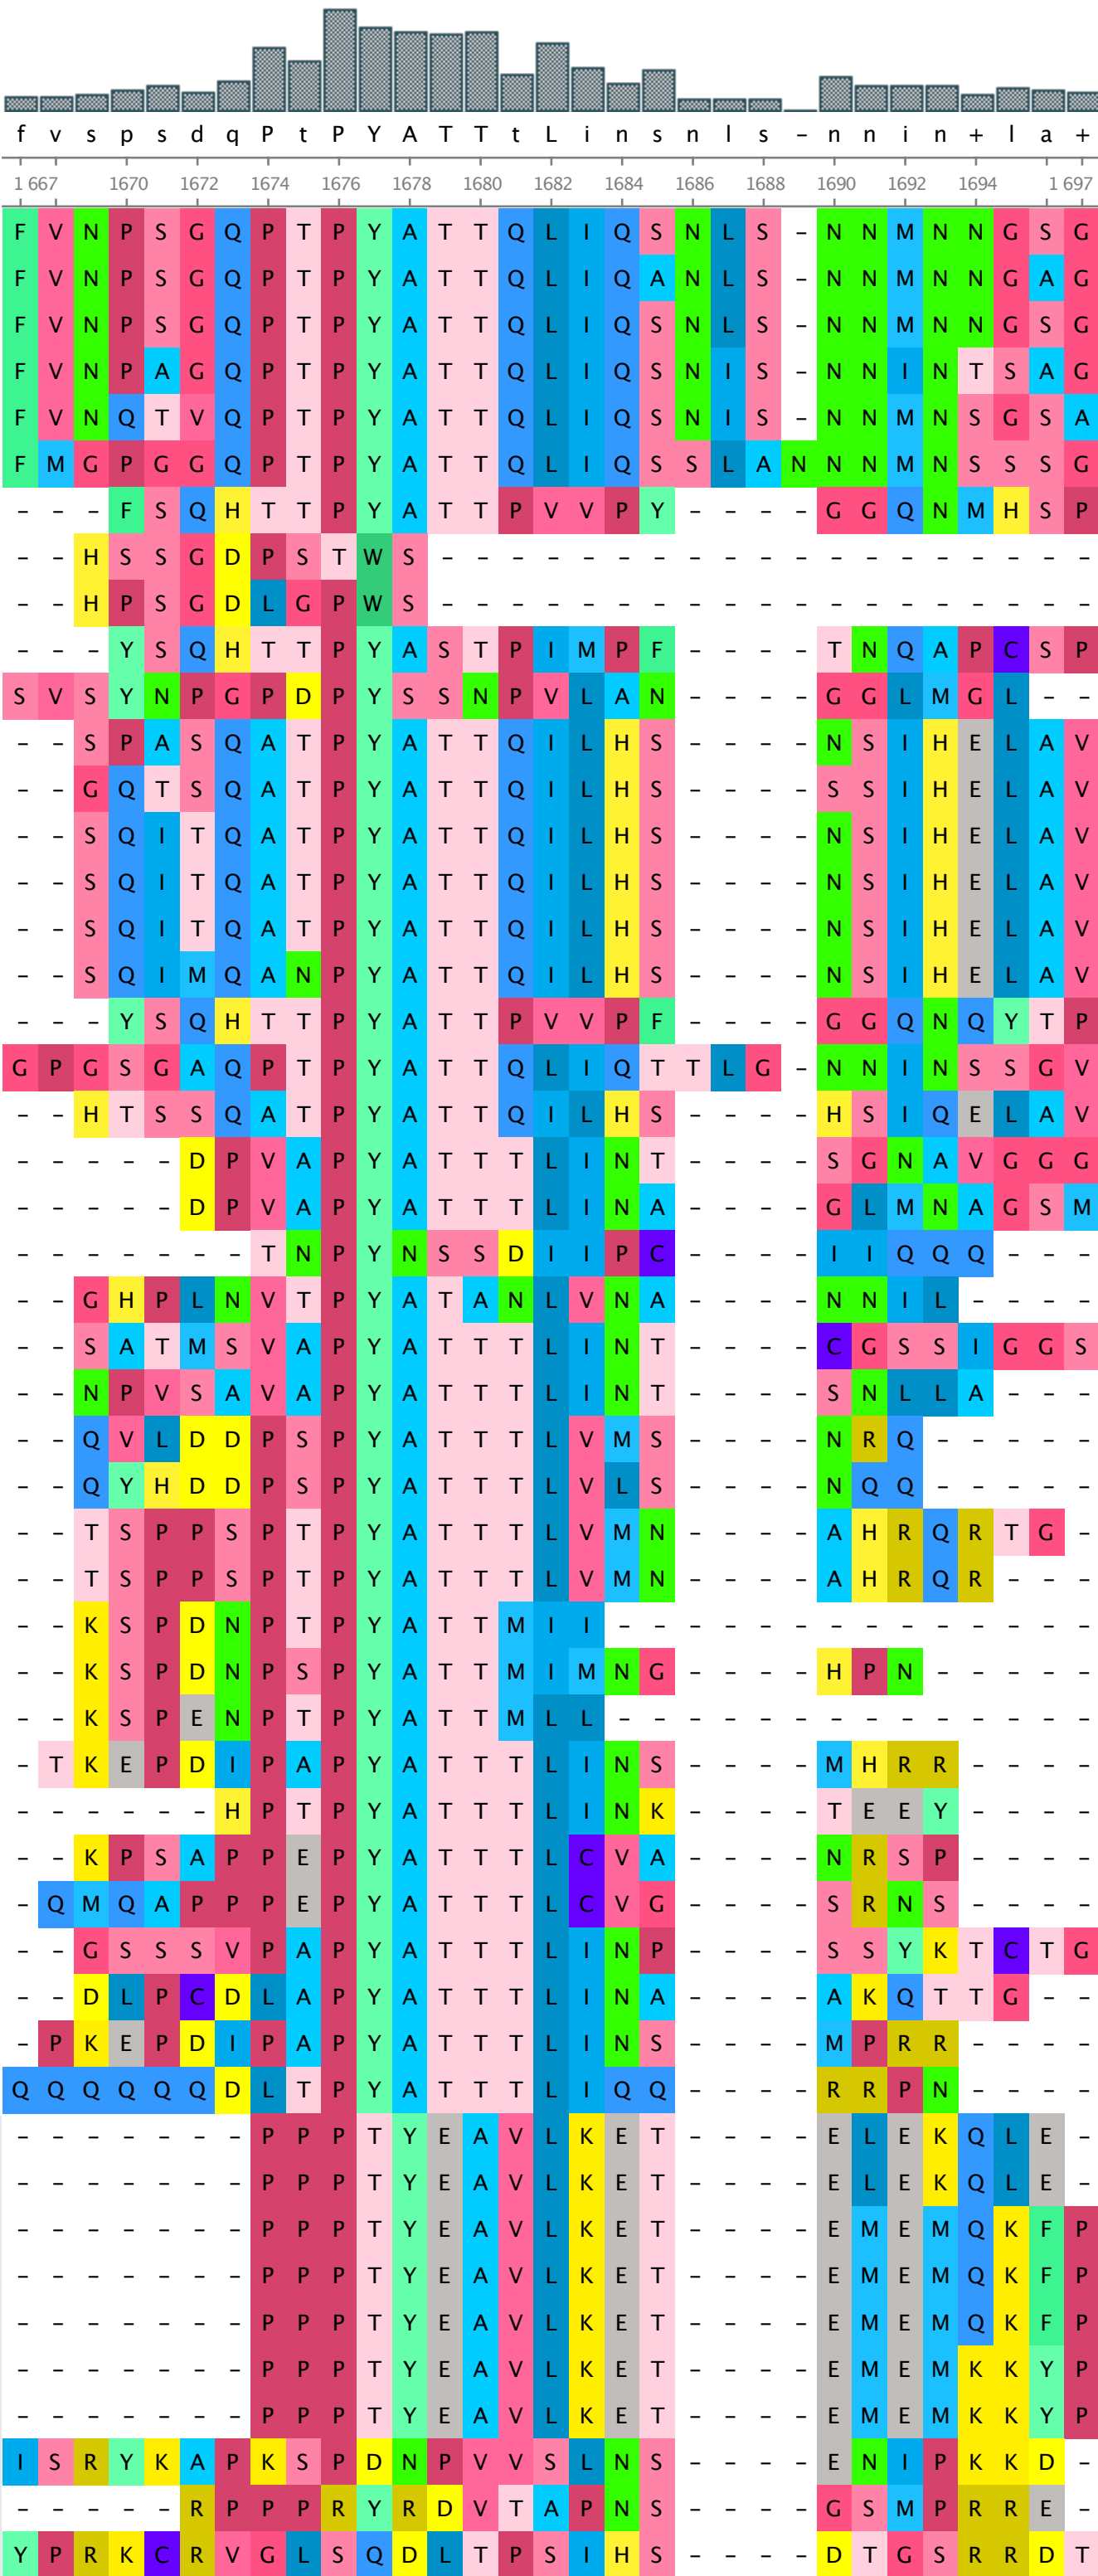

Supplement: supp [file elife_poa_e45530_Figure_6_figure_supplement_1.pdf › elife_poa_e45530_Figure_6_figure_supplement_1.pdf]
