# Supplementary material for: The genetic factors of bilaterian evolution
Source: PubMed Central journal article supplement (PMC7535936; doi:10.7554/elife.45530), 2020-07-16
Supplement: elife-45530-supp1.pdf [file elife-45530-supp1.pdf]

# The genetic factors of bilaterian evolution.

Peter Heger, Wen Zheng, Anna Rottmann, Kristen A. Panfilio, Thomas

Wiehe

Supporting Information

| Species                            | Read Archive ID | CEGMA [%] | Web address for download                                                                                                                                                                                                                                                                              |
|------------------------------------|-----------------|-----------|-------------------------------------------------------------------------------------------------------------------------------------------------------------------------------------------------------------------------------------------------------------------------------------------------------|
| <i>Aiptasia pallida</i>            | ?               | 41.1      | <a href="https://www.ncbi.nlm.nih.gov/sra/?term=SRX202151">https://www.ncbi.nlm.nih.gov/sra/?term=SRX202151</a> & <a href="https://www.ncbi.nlm.nih.gov/sra/?term=SRX231866">SRX231866</a>                                                                                                            |
| <i>Anemonia viridis</i>            | LIBEST_023433   | 15.7      | <a href="https://www.ncbi.nlm.nih.gov/biosample/?term=LIBEST_023433">https://www.ncbi.nlm.nih.gov/biosample/?term=LIBEST_023433</a>                                                                                                                                                                   |
| <i>Boreo sp.</i>                   | ERR216194       | 27.8      | <a href="https://trace.ncbi.nlm.nih.gov/Traces/sra/?run=ERR216194">https://trace.ncbi.nlm.nih.gov/Traces/sra/?run=ERR216194</a>                                                                                                                                                                       |
| <i>Brachionus calyciflorus</i>     | ?               | 92.7      | <a href="https://trace.ncbi.nlm.nih.gov/Traces/sra/?run=SRR611718">https://trace.ncbi.nlm.nih.gov/Traces/sra/?run=SRR611718</a> & <a href="https://trace.ncbi.nlm.nih.gov/Traces/sra/?run=SRR611719">SRR611719</a> , <a href="https://trace.ncbi.nlm.nih.gov/Traces/sra/?run=SRR611720">SRR611720</a> |
| <i>Brachionus calyciflorus</i> 5.6 | ?               | –         | <a href="https://www.ncbi.nlm.nih.gov/sra/SRX203183">https://www.ncbi.nlm.nih.gov/sra/SRX203183</a> [accn]                                                                                                                                                                                            |
| <i>Bugula neritina</i>             | SRR034781       | 14.5      | <a href="https://trace.ncbi.nlm.nih.gov/Traces/sra/?run=SRR034781">https://trace.ncbi.nlm.nih.gov/Traces/sra/?run=SRR034781</a>                                                                                                                                                                       |
| <i>Cephalothrix hongkongiensis</i> | SRR618505       | 75.0      | <a href="https://trace.ncbi.nlm.nih.gov/Traces/sra/?run=SRR618505">https://trace.ncbi.nlm.nih.gov/Traces/sra/?run=SRR618505</a>                                                                                                                                                                       |
| <i>Chiton olivaceus</i>            | SRR618506       | 55.2      | <a href="https://trace.ncbi.nlm.nih.gov/Traces/sra/?run=SRR618506">https://trace.ncbi.nlm.nih.gov/Traces/sra/?run=SRR618506</a>                                                                                                                                                                       |
| <i>Eupolybothrus cavernicolus</i>  | ERR338470       | 85.1      | <a href="https://trace.ncbi.nlm.nih.gov/Traces/sra/?run=ERR338470">https://trace.ncbi.nlm.nih.gov/Traces/sra/?run=ERR338470</a>                                                                                                                                                                       |
| <i>Evechinus chloroticus</i>       | ?               | 91.1      | <a href="https://trace.ncbi.nlm.nih.gov/Traces/sra/?run=SRR1014618">https://trace.ncbi.nlm.nih.gov/Traces/sra/?run=SRR1014618</a> & <a href="https://trace.ncbi.nlm.nih.gov/Traces/sra/?run=SRR1014619">SRR1014619</a>                                                                                |
| <i>Hermodice carunculata</i>       | SRR651044       | 93.9      | <a href="https://trace.ncbi.nlm.nih.gov/Traces/sra/?run=SRR651044">https://trace.ncbi.nlm.nih.gov/Traces/sra/?run=SRR651044</a>                                                                                                                                                                       |
| <i>Hormogaster elisae</i>          | ?               | 97.2      | <a href="https://trace.ncbi.nlm.nih.gov/Traces/sra/?run=SRR786597">https://trace.ncbi.nlm.nih.gov/Traces/sra/?run=SRR786597</a> & <a href="https://trace.ncbi.nlm.nih.gov/Traces/sra/?run=SRR786598">SRR786598</a>                                                                                    |
| <i>Lingula anatina</i>             | SRR330440       | 8.1       | <a href="https://trace.ncbi.nlm.nih.gov/Traces/sra/?run=SRR330440">https://trace.ncbi.nlm.nih.gov/Traces/sra/?run=SRR330440</a>                                                                                                                                                                       |
| <i>Metasiro americanus</i>         | SRR618563       | 92.7      | <a href="https://trace.ncbi.nlm.nih.gov/Traces/sra/?run=SRR618563">https://trace.ncbi.nlm.nih.gov/Traces/sra/?run=SRR618563</a>                                                                                                                                                                       |
| <i>Mnemiopsis leidyi</i>           | LIBEST_014587   | –         | <a href="https://www.ncbi.nlm.nih.gov/nucest/?term=LIBEST_014587">https://www.ncbi.nlm.nih.gov/nucest/?term=LIBEST_014587</a>                                                                                                                                                                         |
| <i>Mnemiopsis leidyi</i>           | LIBEST_022347   | 21.8      | <a href="https://www.ncbi.nlm.nih.gov/nucest/?term=LIBEST_022347">https://www.ncbi.nlm.nih.gov/nucest/?term=LIBEST_022347</a>                                                                                                                                                                         |
| <i>Mnemiopsis leidyi</i>           | ?               | –         | <a href="https://research.nhgri.nih.gov/mnemiopsis/download/teome/ML2.2_aa.gz">https://research.nhgri.nih.gov/mnemiopsis/download/teome/ML2.2_aa.gz</a>                                                                                                                                               |
| <i>Myxobolus cerebralis</i>        | SRR628302       | 26.6      | <a href="https://trace.ncbi.nlm.nih.gov/Traces/sra/?run=SRR628302">https://trace.ncbi.nlm.nih.gov/Traces/sra/?run=SRR628302</a>                                                                                                                                                                       |
| <i>Nasoconaria sinensis</i>        | SRR1048661      | 86.7      | <a href="https://trace.ncbi.nlm.nih.gov/Traces/sra/?run=SRR1048661">https://trace.ncbi.nlm.nih.gov/Traces/sra/?run=SRR1048661</a>                                                                                                                                                                     |
| <i>Patiria miniata</i>             | SRR053628       | –         | <a href="https://trace.ncbi.nlm.nih.gov/Traces/sra/?run=SRR053628">https://trace.ncbi.nlm.nih.gov/Traces/sra/?run=SRR053628</a>                                                                                                                                                                       |
| <i>Patiria miniata</i>             | SRR1138705      | –         | <a href="https://trace.ncbi.nlm.nih.gov/Traces/sra/?run=SRR1138705">https://trace.ncbi.nlm.nih.gov/Traces/sra/?run=SRR1138705</a>                                                                                                                                                                     |
| <i>Patiria miniata</i>             | SRX021529       | 96.0      | <a href="https://www.ncbi.nlm.nih.gov/sra/SRX021529">https://www.ncbi.nlm.nih.gov/sra/SRX021529</a> [accn]                                                                                                                                                                                            |
| <i>Patiria miniata</i>             | SRX021531       | –         | <a href="https://www.ncbi.nlm.nih.gov/sra/SRX021531">https://www.ncbi.nlm.nih.gov/sra/SRX021531</a> [accn]                                                                                                                                                                                            |
| <i>Ptychodera flava</i>            | SRR1029584      | 55.6      | <a href="https://trace.ncbi.nlm.nih.gov/Traces/sra/?run=SRR1029584">https://trace.ncbi.nlm.nih.gov/Traces/sra/?run=SRR1029584</a>                                                                                                                                                                     |
| <i>Urticina eques</i>              | SRR942796       | 11.7      | <a href="https://trace.ncbi.nlm.nih.gov/Traces/sra/?run=SRR942796">https://trace.ncbi.nlm.nih.gov/Traces/sra/?run=SRR942796</a>                                                                                                                                                                       |

**Supplementary Table 1: Transcriptome sequence download links and CEGMA results for the species used in BigWenDB.** The left column indicates the species from which we downloaded transcriptomes and generated transcriptomic ORFs. The respective download address is shown in the right column.

| Species                              | Taxon ID | Phylum     | CEGMA score |
|--------------------------------------|----------|------------|-------------|
| <i>Anemonia viridis</i>              | 51769    | Cnidaria   | 16 %        |
| <i>Acropora cervicornis</i>          | 6130     | Cnidaria   | 79.44 %     |
| <i>Acropora millepora</i>            | 45264    | Cnidaria   | 51.61 %     |
| <i>Aiptasia pallida</i>              | 12923    | Cnidaria   | 41 %        |
| <i>Aphrocallistes vastus</i>         | 83887    | Porifera   | 94.35 %     |
| <i>Beroe abyssicola</i>              | 320166   | Ctenophora | 84.27 %     |
| <i>Bolocera tuediae</i>              | 1163374  | Cnidaria   | 32 %        |
| <i>Beroe sp.</i>                     | 220132   | Ctenophora | 28 %        |
| <i>Crella elegans</i>                | 252961   | Porifera   | 22.18 %     |
| <i>Gorgonia ventalina</i>            | 204384   | Cnidaria   | 93 %        |
| <i>Hydractinia symbiolongicarpus</i> | 13093    | Cnidaria   | 71.77 %     |
| <i>Myxobolus cerebralis</i>          | 59783    | Cnidaria   | 26 %        |
| <i>Nanomia bijuga</i>                | 168759   | Cnidaria   | 87 %        |
| <i>Hormathia digitata</i>            | 1163372  | Cnidaria   | 45 %        |
| <i>Montastraea faveolata</i>         | 48498    | Cnidaria   | 25.4 %      |
| <i>Metridium senile</i>              | 6116     | Cnidaria   | 16.13 %     |
| <i>Oscarella carmela</i>             | 386100   | Porifera   | 99 %        |
| <i>Petrosia ficiformis</i>           | 68564    | Porifera   | 94 %        |
| <i>Porites australiensis</i>         | 51061    | Cnidaria   | 95.97 %     |
| <i>Stylophora pistillata</i>         | 50429    | Cnidaria   | 67.34 %     |
| <i>Suberites domuncula</i>           | 55567    | Porifera   | 20.97 %     |
| <i>Bolinopsis infundibulum</i>       | 140455   | Ctenophora | 69.35 %     |
| <i>Euplokamis dunlapae</i>           | 1403701  | Ctenophora | 56.45 %     |
| <i>Urticina eques</i>                | 417072   | Cnidaria   | 11.69 %     |
| <i>Vallicula multiformis</i>         | 140489   | Ctenophora | 66.53 %     |

**Supplementary Table 2: CEGMA results for 25 transcriptomes of non-bilaterian metazoans.** The BigWenDB contains sequence data from 33 non-bilaterian metazoans. For eight non-bilaterian species, including four cnidarians, we collected genomic ORF data (Figure 1–Figure Supplement 1), they are not listed here. CEGMA results of 15 additional cnidarian species are highlighted in red. Each of the non-bilaterian phyla—Porifera, Ctenophora, and Cnidaria—is covered by several species with high CEGMA score.

| Species                              | Superphylum | Web address for download                                                                                                            |
|--------------------------------------|-------------|-------------------------------------------------------------------------------------------------------------------------------------|
| <i>Acropora digitifera</i>           | nB          | <a href="https://www.ncbi.nlm.nih.gov/nucleotide/BACK00000000">https://www.ncbi.nlm.nih.gov/nucleotide/BACK00000000</a>             |
| <i>Alatina moseri</i>                | nB          | <a href="https://www.ncbi.nlm.nih.gov/nucleotide/AHZ000000000">https://www.ncbi.nlm.nih.gov/nucleotide/AHZ000000000</a>             |
| <i>Amphimedon queenslandica</i>      | nB          | <a href="https://www.ncbi.nlm.nih.gov/nucleotide/ACUQ01000000">https://www.ncbi.nlm.nih.gov/nucleotide/ACUQ01000000</a>             |
| <i>Caenorhabditis elegans</i>        | E           | <a href="https://www.ncbi.nlm.nih.gov/assembly/GCA_000002985.3#/def">https://www.ncbi.nlm.nih.gov/assembly/GCA_000002985.3#/def</a> |
| <i>Callorhinchus milii</i>           | D           | <a href="https://www.ncbi.nlm.nih.gov/nucleotide/AAVX02000000">https://www.ncbi.nlm.nih.gov/nucleotide/AAVX02000000</a>             |
| <i>Capitella teleta</i>              | L           | <a href="https://www.ncbi.nlm.nih.gov/nucleotide/AMQN01000000">https://www.ncbi.nlm.nih.gov/nucleotide/AMQN01000000</a>             |
| <i>Crassostrea gigas</i>             | L           | <a href="https://www.ncbi.nlm.nih.gov/nucleotide/AFTI01000000">https://www.ncbi.nlm.nih.gov/nucleotide/AFTI01000000</a>             |
| <i>Drosophila melanogaster</i>       | E           | <a href="https://www.ncbi.nlm.nih.gov/nucleotide/ABU000000000">https://www.ncbi.nlm.nih.gov/nucleotide/ABU000000000</a>             |
| <i>Helobdella robusta</i>            | L           | <a href="https://www.ncbi.nlm.nih.gov/nucleotide/AMQM01000000">https://www.ncbi.nlm.nih.gov/nucleotide/AMQM01000000</a>             |
| <i>Homo sapiens</i>                  | D           | <a href="https://www.ncbi.nlm.nih.gov/assembly/GCA_000001405.26">https://www.ncbi.nlm.nih.gov/assembly/GCA_000001405.26</a>         |
| <i>Hydra magnipapillata</i>          | nB          | <a href="https://www.ncbi.nlm.nih.gov/nucleotide/ACZU01000000">https://www.ncbi.nlm.nih.gov/nucleotide/ACZU01000000</a>             |
| <i>Latimeria chalumnae</i>           | D           | <a href="https://www.ncbi.nlm.nih.gov/nucleotide/BAH001000000">https://www.ncbi.nlm.nih.gov/nucleotide/BAH001000000</a>             |
| <i>Lottia gigantea</i>               | L           | <a href="https://www.ncbi.nlm.nih.gov/nucleotide/AMQ001000000">https://www.ncbi.nlm.nih.gov/nucleotide/AMQ001000000</a>             |
| <i>Mnemiopsis leidyi</i>             | nB          | <a href="https://www.ncbi.nlm.nih.gov/nucleotide/AGCP01000000">https://www.ncbi.nlm.nih.gov/nucleotide/AGCP01000000</a>             |
| <i>Nematostella vectensis</i>        | nB          | <a href="https://www.ncbi.nlm.nih.gov/nucleotide/ABAV01000000">https://www.ncbi.nlm.nih.gov/nucleotide/ABAV01000000</a>             |
| <i>Parasteatoda tepidariorum</i>     | E           | <a href="https://www.ncbi.nlm.nih.gov/nucleotide/AOMJ00000000">https://www.ncbi.nlm.nih.gov/nucleotide/AOMJ00000000</a>             |
| <i>Pleurobrachia bachei</i>          | nB          | <a href="https://www.ncbi.nlm.nih.gov/nucleotide/AVPN01000000">https://www.ncbi.nlm.nih.gov/nucleotide/AVPN01000000</a>             |
| <i>Priapulid caudatus</i>            | E           | <a href="https://www.ncbi.nlm.nih.gov/nucleotide/AXZU00000000">https://www.ncbi.nlm.nih.gov/nucleotide/AXZU00000000</a>             |
| <i>Romanomermis culicivorax</i>      | E           | <a href="https://www.ncbi.nlm.nih.gov/nucleotide/CAQS00000000">https://www.ncbi.nlm.nih.gov/nucleotide/CAQS00000000</a>             |
| <i>Saccoglossus kowalevskii</i>      | D           | <a href="https://www.ncbi.nlm.nih.gov/nucleotide/ACQM01000000">https://www.ncbi.nlm.nih.gov/nucleotide/ACQM01000000</a>             |
| <i>Schistosoma japonicum</i>         | L           | <a href="https://www.ncbi.nlm.nih.gov/nucleotide/CABF01000000">https://www.ncbi.nlm.nih.gov/nucleotide/CABF01000000</a>             |
| <i>Strigamia maritima</i>            | E           | <a href="https://www.ncbi.nlm.nih.gov/nucleotide/AFFK01000000">https://www.ncbi.nlm.nih.gov/nucleotide/AFFK01000000</a>             |
| <i>Strongylocentrotus purpuratus</i> | D           | <a href="https://www.ncbi.nlm.nih.gov/nucleotide/AAGJ00000000">https://www.ncbi.nlm.nih.gov/nucleotide/AAGJ00000000</a>             |
| <i>Tribolium castaneum</i>           | E           | <a href="https://www.ncbi.nlm.nih.gov/nucleotide/AAJJ00000000">https://www.ncbi.nlm.nih.gov/nucleotide/AAJJ00000000</a>             |
| <i>Trichoplax adhaerens</i>          | nB          | <a href="https://www.ncbi.nlm.nih.gov/nucleotide/ABGP01000000">https://www.ncbi.nlm.nih.gov/nucleotide/ABGP01000000</a>             |

**Supplementary Table 3: Genome sequence download links for 25 species.** The left column indicates 25 species for which we downloaded genome assemblies and generated genomic ORFs (download address see right column). Their assignment to one of four superphyla is denoted in the central column. nB = non-Bilateria; D = Deuterostomia; E = Ecdysozoa; L = Lophotrochozoa.

| Command                 | Output of OrthoMCL, original version and R version |                                  |         |       |
|-------------------------|----------------------------------------------------|----------------------------------|---------|-------|
| wc -l BLAST_output.tbl  | 243,586,115                                        |                                  |         |       |
| wc -l orthologs.txt     | 56,298                                             |                                  |         |       |
| md5sum orthologs.txt    | bb1f573a1a655bc1823b0cedd15e323f                   |                                  |         |       |
| head -5 orthologs.txt   | Query                                              |                                  | Subject | Score |
|                         | 283909 orf_AMQN01000004.1_7_0                      | 400682 orf_ACUQ01027136.1_5_0    |         | 1.013 |
|                         | 283909 orf_AMQN01000004.1_9_0                      | 400682 orf_ACUQ01002585.1_372_0  |         | 0.731 |
|                         | 283909 orf_AMQN01000013.1_352_0                    | 400682 orf_ACUQ01002623.1_320_0  |         | 0.34  |
|                         | 283909 orf_AMQN01000022.1_395_0                    | 400682 orf_ACUQ01000660.1_549_0  |         | 0.578 |
|                         | 283909 orf_AMQN01000022.1_399_0                    | 400682 orf_ACUQ01000660.1_553_0  |         | 0.31  |
| wc -l inparalogs.txt    | 36,169,614                                         |                                  |         |       |
| md5sum inparalogs.txt   | f7022d81bdbac55fa3bdd0ce5f43ab1d                   |                                  |         |       |
| head -5 inparalogs.txt  | Query                                              |                                  | Subject | Score |
|                         | 283909 orf_AMQN01000002.1_10_0                     | 283909 orf_AMQN01009125.1_12_0   |         | 0.464 |
|                         | 283909 orf_AMQN01000002.1_198_0                    | 283909 orf_AMQN01000122.1_693_0  |         | 0.247 |
|                         | 283909 orf_AMQN01000002.1_198_0                    | 283909 orf_AMQN01000957.1_1014_0 |         | 0.184 |
|                         | 283909 orf_AMQN01000002.1_198_0                    | 283909 orf_AMQN01001209.1_66_0   |         | 0.238 |
|                         | 283909 orf_AMQN01000002.1_198_0                    | 283909 orf_AMQN01003462.1_223_0  |         | 0.157 |
| wc -l coorthologs.txt   | 17,118                                             |                                  |         |       |
| md5sum coorthologs.txt  | ea58aaa7e148d5bb6182e821c360e655                   |                                  |         |       |
| head -5 coorthologs.txt | Query                                              |                                  | Subject | Score |
|                         | 283909 orf_AMQN01000013.1_352_0                    | 400682 orf_ACUQ01002623.1_295_0  |         | 0.178 |
|                         | 283909 orf_AMQN01000051.1_3573_0                   | 400682 orf_ACUQ01007187.1_362_0  |         | 0.349 |
|                         | 283909 orf_AMQN01000059.1_392_0                    | 400682 orf_ACUQ01018084.1_12_0   |         | 0.249 |
|                         | 283909 orf_AMQN01000061.1_168_0                    | 400682 orf_ACUQ01004990.1_369_0  |         | 0.585 |
|                         | 283909 orf_AMQN01000061.1_168_0                    | 400682 orf_ACUQ01004991.1_413_0  |         | 0.585 |

**Supplementary Table 4: Comparison between the standard OrthoMCL pipeline and our R version.** To create a test dataset for the R version of OrthoMCL, we merged the first 100 (of 10,000) BLAST output tables of the full dataset, comprising 243,586,115 BLAST hits, and processed the resulting file in parallel with the R version of OrthoMCL and with the original version [Li et al. 2003]. Both pipelines delivered identical ortholog, inparalog, and coortholog tables which serve as input for the final clustering steps. This table shows the number of rows present in the BLAST output table (wc -l BLAST\_output.tbl) and in the three OrthoMCL output tables (wc -l orthologs.txt inparalogs.txt coorthologs.txt) as well as the associated MD5 message digest checksums. In addition, the first five rows of all three orthology tables are displayed (head -5 orthologs.txt inparalogs.txt coorthologs.txt). All numbers and row contents are identical between the original and the R version of OrthoMCL.

| <b>Number of ...</b>           | <b>Three tables</b><br>(incl. inparalog table) | <b>Two tables</b><br>(excl. inparalog table) |
|--------------------------------|------------------------------------------------|----------------------------------------------|
| collected sequences            | 124,031,501                                    | 124,031,501                                  |
| seq in blast table             | 122,149,508                                    | 122,149,508                                  |
| blast pairs in total           | 5,966,491,524                                  | 5,966,491,524                                |
| seq pairs in ortholog table    | 92,901,096                                     | 92,901,096                                   |
| seq pairs in co-ortholog table | 25,598,428                                     | 25,598,428                                   |
| seq pairs in in-paralog table  | 688,344,999                                    | —                                            |
| seq pairs in total             | 806,844,523                                    | 118,499,524                                  |
| Orthologous groups (OGs)       | 4,049,532                                      | 824,605                                      |
| ORF seq in OGs                 | 28,211,771                                     | 2,387,557                                    |
| TRS seq in OGs                 | 4,633,170                                      | 2,207,632                                    |
| NCBI seq in OGs                | 2,210,531                                      | 2,032,530                                    |
| seq in OGs in total            | 35,227,294                                     | 6,743,519                                    |
| seq not in OGs                 | 86,922,214                                     | 115,405,989                                  |
| OGs with $\leq 3$ species      | 3,854,629                                      | 637,895                                      |
| OGs with $\geq 10$ species     | 74,398                                         | 75,744                                       |
| OGs with $\leq 3$ seq          | 74.8%: 3,028,635                               | 71.8%: 592,260                               |
| OGs with $\geq 10$ seq         | 365,492                                        | 97,967                                       |

**Supplementary Table 5: Summary statistics of Markov clusterings.** The central column (“Three tables”) displays basic clustering results from using all three orthology tables (ortholog, co-ortholog, and inparalog table), while the right column reports results obtained from clustering with the ortholog and co-ortholog tables. For all further analyses, the two-table results without inparalog table were used.

| Ortholog <i>Drosophila</i> |                | Ortholog <i>Homo</i> |                | BigWen OG                    | Composition of OG |          |    |    |     |
|----------------------------|----------------|----------------------|----------------|------------------------------|-------------------|----------|----|----|-----|
|                            |                |                      |                |                              | Po                | Pl       | Ct | Cn | Bi  |
| tin                        | [AAF55890]     | NKX2.3               | [NP_660328]    | OG_92160 (Dm)<br>OG_613 (Hs) | 0                 | 0        | 0  | 0  | 10  |
|                            |                | NKX2.5               | [NP_004378]    |                              | 1                 | <b>1</b> | 2  | 16 | 128 |
|                            |                | NKX2.6               | [A6NCS4]       |                              |                   |          |    |    |     |
| bap                        | [AAF55891]     | NKX3.1               | [Q99801]       | OG_7136                      | 4                 | 0        | 0  | 8  | 94  |
|                            |                | NKX3.2               | [P78367]       |                              |                   |          |    |    |     |
| lbe*                       | [CAA70056]     | LBX1                 | [P52954]       | OG_8094                      | 1                 | 0        | 2  | 9  | 85  |
| lbl                        | [NP_001262805] | LBX2                 | [Q6XYB7]       |                              |                   |          |    |    |     |
| C15                        | [AAF55898]     | TLX1                 | [P31314]       | OG_7799                      | 3                 | 0        | 6  | 2  | 81  |
|                            |                | TLX2                 | [O43763]       |                              |                   |          |    |    |     |
|                            |                | TLX3                 | [O43711]       |                              |                   |          |    |    |     |
| slou                       | [P22807]       | NKX1.1               | [Q9UD57]       | OG_7615                      | 1                 | 0        | 1  | 7  | 91  |
|                            |                | NKX1.2               | [NP_001139812] |                              |                   |          |    |    |     |

**Supplementary Table 6: Orthogroup composition of NK cluster genes in the BigWen database.**

The table shows, from left to right, *Drosophila* NK genes, their corresponding human orthologs and paralogs (GenBank accession numbers in square brackets), the orthogroup(s) to which an NK gene was assigned in our dataset, and the composition of this orthogroup, denoting the number of species from Po (Porifera), Pl (Placozoa), Ct (Ctenophora), Cn (Cnidaria), and Bi (Bilateria) that belong to this group. In contrast to other NK genes, *D. melanogaster* tinman is not placed with its human counterparts, but is a member of an extra orthogroup restricted to Endopterygota (OG\_92160, see text). NKX2.3 is the only NK cluster gene with a potential ortholog in Placozoa (bold). \*: Lbe/lbl in *Drosophila* and LBX1/LBX2 in *Homo* are both independent duplications of a single ancestral ladybird gene [Cande et al. 2009] and not orthologous to each other. Left column: tin (tinman), bap (bagpipe), lbe (ladybird early), lbl (ladybird late), slou (slouch).

| OG        | Name      | OG comp.        | HMM hits     | OG comp.              | Ancestor      | E-value             |
|-----------|-----------|-----------------|--------------|-----------------------|---------------|---------------------|
| OG_7767   | Sprouty   | 1 Pl; 85 B      | 1. OG_46647  | 15 Cn; 2 L            | Eumetazoa     | 6.0e <sup>-30</sup> |
|           |           |                 | 2. OG_58139  | 13 Cn; 1 E            | Eumetazoa     | 1.8e <sup>-27</sup> |
|           |           |                 | 3. OG_73898  | 8 Cn; 1 E             | Eumetazoa     | 2.1e <sup>-23</sup> |
| OG_46647  | Sprouty-2 | 15 Cn; 2 L      | 1. OG_58139  | 13 Cn; 1 E            | Eumetazoa     | 6.2e <sup>-36</sup> |
|           |           |                 | 2. OG_7767   | 1 Pl; 85 B            | Metazoa       | 1.3e <sup>-29</sup> |
|           |           |                 | 3. OG_73898  | 8 Cn; 1 E             | Eumetazoa     | 7.4e <sup>-27</sup> |
| OG_58139  | Sprouty-3 | 13 Cn; 1 E      | 1. OG_46647  | 15 Cn; 2 L            | Eumetazoa     | 1.7e <sup>-36</sup> |
|           |           |                 | 2. OG_7767   | 1 Pl; 85 B            | Metazoa       | 2.9e <sup>-27</sup> |
|           |           |                 | 3. OG_73898  | 8 Cn; 1 E             | Eumetazoa     | 2.9e <sup>-25</sup> |
| OG_73898  | Sprouty-4 | 8 Cn; 1 E       | 1. OG_46647  | 15 Cn; 2 L            | Eumetazoa     | 3.4e <sup>-27</sup> |
|           |           |                 | 2. OG_58139  | 13 Cn; 1 E            | Eumetazoa     | 2.3e <sup>-25</sup> |
|           |           |                 | 3. OG_7767   | 1 Pl; 85 B            | Metazoa       | 6.4e <sup>-23</sup> |
| OG_56080  | GAF       | 13 Diptera      | 1. OG_165721 | 5 Pterygota           | Pterygota     | 1.9e <sup>-73</sup> |
|           |           |                 | 2. OG_405835 | 2 Sophophora          | Sophophora    | 5.9e <sup>-52</sup> |
|           |           |                 | 3. OG_26633  | 23 Pancrustacea       | Pancrustacea  | 4.8e <sup>-28</sup> |
| OG_165721 | GAF-2     | 5 Pterygota     | 1. OG_56080  | 13 Diptera            | Diptera       | 4.2e <sup>-71</sup> |
|           |           |                 | 2. OG_26633  | 23 Pancrustacea       | Pancrustacea  | 1.2e <sup>-26</sup> |
|           |           |                 | 3. OG_34593  | 21 Hexapoda           | Hexapoda      | 2.8e <sup>-26</sup> |
| OG_26633  | n.d.      | 23 Pancrustacea | 1. OG_34593  | 21 Hexapoda           | Hexapoda      | 7.6e <sup>-58</sup> |
|           |           |                 | 2. OG_6341   | 1 Cn; 2 Ct; 37 E; 1 L | Metazoa       | 1.1e <sup>-57</sup> |
|           |           |                 | 3. OG_157127 | 5 Endopterygota       | Endopterygota | 2.7e <sup>-56</sup> |

**Supplementary Table 7: The HMM-HMM reciprocal best hit strategy for orthogroup completion.**

Orthogroup ID, corresponding gene name, and orthogroup composition is shown for several reciprocal HMM-HMM best hit orthogroups of two example proteins, Sprouty and GAGA factor. Columns 4–7 summarise results of HMM-HMM searches in our database. In column four and five, orthogroup ID and composition of the three best search hits for each query is shown. Column six and seven report last common ancestor and corresponding E-value of hit orthogroups. B = Bilateria; Cn = Cnidaria; Ct = Ctenophora; D = Deuterostomia; E = Ecdysozoa; L = Lophotrochozoa; Pl = Placozoa; n.d. = not determined. Orthogroups are coloured to illustrate reciprocal best hit relationships. Note that the four orthogroups OG\_7767, OG\_46647, OG\_58139, and OG\_73898 are each other's hits in reciprocal HMM-HMM searches, suggesting that a combination of the four orthogroups with the inferred ancestor "Metazoa" (ancestor of bilaterians, cnidarians, and placozoans) correctly reflects evolutionary history, in agreement with the description of Sprouty in cnidarians [Matus et al. 2007]. Similarly, OG\_56080 and OG\_165721 are each other's reciprocal best hit while another orthogroup, OG\_26633, does not satisfy this criterion. The complete orthogroup for GAGA factor is therefore a combination of OG\_56080 and OG\_165721 with the ancestor "Pterygota", as published previously [Heger et al. 2013].



| OG       | Uniprot ID Hs      | # ZF | Gene name Dm                                          | # ZF |
|----------|--------------------|------|-------------------------------------------------------|------|
| OG_5117  | BC11A_HUMAN        | 6    | CG9650 (Q494J4_DROME)                                 | 5    |
| OG_5533  | CASZ1_HUMAN        | 8    | castor (CAS_DROME)                                    | 4    |
| OG_5543  | EVIL_HUMAN         | 10   | CG10348 (Q4V722_DROME)                                | 3    |
| OG_6452  | CTCF_HUMAN         | 11   | CTCF (Q9VS55_DROME)                                   | 11   |
| OG_6894  | ZN384_HUMAN        | 8    | rotund (RN_DROME)                                     | 6    |
| OG_7047  | ZN236_HUMAN        | 30   | XP_001807307 ( <i>T. castaneum</i> )                  | 23   |
| OG_8049  | ZN521_HUMAN        | 30   | O/E-ass. zinc finger protein (A0A0B4JD76_DROME)       | 9    |
| OG_8738  | ZN407_HUMAN        | 22   | CG31612 (Q9V9Q2_DROME)                                | 7    |
| OG_9930  | PRD10_HUMAN        | 10   | XP_974598 ( <i>T. castaneum</i> )                     | 13   |
| OG_10418 | ZFAT_HUMAN         | 19   | 126957 predict_SMAR002996-PA_0 ( <i>S. maritima</i> ) | 18   |
| OG_11041 | PLAL1_HUMAN        | 7    | XP_975272 ( <i>T. castaneum</i> )                     | 7    |
| OG_11354 | 10224 gi_297139771 | 5    | schnurri (Q24605_DROME)                               | 8    |
| OG_14415 | ZF64B_HUMAN        | 13   | 126957 predict_SMAR005066-PA_0 ( <i>S. maritima</i> ) | 7    |

**Supplementary Table 8: Bilaterian-specific poly-zinc finger transcription factors.** First column: Orthogroup ID of 13 bilaterian-specific zinc finger proteins with tandem C<sub>2</sub>H<sub>2</sub> domains (according to BigWenDB). Second and third column: Uniprot ID and number of zinc finger domains in the human ortholog; for OG\_11354, the *Saccoglossus kowalevskii* ortholog is listed because no chordate species are present in the group. Fourth column: Name and Uniprot ID (in parentheses) of the *D. melanogaster* ortholog. In orthogroups without *Drosophila* sequence, the corresponding *T. castaneum* or *S. maritima* name and ID is listed. Fifth column: Number of zinc finger domains of the corresponding arthropod ortholog. *T. castaneum*: *Tribolium castaneum* (Insecta), *S. maritima*: *Strigamia maritima* (Myriapoda).

| OG              | Best hit in BigWenDB  | E-value      | Best hit in non-Bilateria         | E-value      |
|-----------------|-----------------------|--------------|-----------------------------------|--------------|
| OG_8220         | 283909 gi_443712155   | $1.9e^{-90}$ | 68564 trs_comp42343_c0_seq14_4_0  | $6.2e^{-10}$ |
| OG_13336        | 7868 predict_SINCAMP* | $3.0e^{-71}$ | 45351 gi_156229131                | $2.0e^{-05}$ |
| OG_28197        | 8478 gi_530579811     | $4.4e^{-60}$ | 68564 trs_comp25246_c0_seq1_8_0   | $2.3e^{-12}$ |
| <b>OG_31055</b> | 137513 trs_comp59583* | $9.9e^{-31}$ | 204384 trs_comp110987_c0_seq3_7_0 | $4.5e^{-23}$ |
| OG_33174        | 10090 gi_148690596    | $5.4e^{-43}$ | 68564 trs_comp43046_c0_seq89_19_0 | $2.2e^{-09}$ |

**Supplementary Table 9: Novel protein domains of bilaterian origin.** Left column: Orthogroup identifier in BigWenDB. Second and third column: Sequence ID and E-value of the best HMM search hit in the entire BigWenDB (HMM search in fasta-formatted BigWenDB sequence collection). In contrast, the fourth and last column show sequence ID and E-value of the best HMM search hit from non-bilaterian metazoans. \*: abbreviated for space constraints. Full ID is 7868|predict\_SINCAMP00000020970\_0 and 137513|trs\_comp59583\_c0\_seq3\_48\_0, respectively. Red colour indicates the only bilaterian-specific orthogroup for which we found similar sequences of non-bilaterian origin, indicating the existence of non-orthologous proteins with a similar domain in non-bilaterians metazoans.

| OG                     | Name                                      | Function                                                                                                                                                                                                                                                                                                                                                                                                                                                                                                                                                                                                                                                                                                                                           |
|------------------------|-------------------------------------------|----------------------------------------------------------------------------------------------------------------------------------------------------------------------------------------------------------------------------------------------------------------------------------------------------------------------------------------------------------------------------------------------------------------------------------------------------------------------------------------------------------------------------------------------------------------------------------------------------------------------------------------------------------------------------------------------------------------------------------------------------|
| <i>Homeobox domain</i> |                                           |                                                                                                                                                                                                                                                                                                                                                                                                                                                                                                                                                                                                                                                                                                                                                    |
| 4203                   | Homeobox protein Hox-D8                   | Sequence-specific transcription factor which is part of a developmental regulatory system that provides cells with specific positional identities on the anterior-posterior axis.                                                                                                                                                                                                                                                                                                                                                                                                                                                                                                                                                                  |
| 5339                   | Prospero homeobox protein 2               | Transcription factor involved in developmental processes such as cell fate determination, gene transcriptional regulation and progenitor cell regulation in a number of organs. Plays a critical role in embryonic development and functions as a key regulatory protein in neurogenesis and the development of the heart, eye lens, liver, pancreas and the lymphatic system. Involved in the regulation of the circadian rhythm. [...]                                                                                                                                                                                                                                                                                                           |
| 11804                  | Homeobox-containing protein 1             | Transcription factor. Isoform 1 acts as a transcriptional repressor. Isoform 4 has very low activity as a transcriptional repressor.                                                                                                                                                                                                                                                                                                                                                                                                                                                                                                                                                                                                               |
| 11810                  | Paired mesoderm homeobox protein 1        | Acts as a transcriptional regulator of muscle creatine kinase (MCK) and so has a role in the establishment of diverse mesodermal muscle types. The protein binds to an A/T-rich element in the muscle creatine enhancer.                                                                                                                                                                                                                                                                                                                                                                                                                                                                                                                           |
| 12894                  | Homeobox protein Mohawk                   | May act as a morphogenetic regulator of cell adhesion.                                                                                                                                                                                                                                                                                                                                                                                                                                                                                                                                                                                                                                                                                             |
| 18424                  | Intestine-specific homeobox               | Transcription factor that regulates gene expression in intestine. May participate in vitamin A metabolism most likely by regulating BCO1 expression in the intestine.                                                                                                                                                                                                                                                                                                                                                                                                                                                                                                                                                                              |
| <i>bHLH domain</i>     |                                           |                                                                                                                                                                                                                                                                                                                                                                                                                                                                                                                                                                                                                                                                                                                                                    |
| 5116                   | Class E basic helix-loop-helix protein 22 | Inhibits DNA binding of TCF3/E47 homodimers and TCF3 (E47)/NEUROD1 heterodimers and acts as a strong repressor of Neurod1 and Myod-responsive genes, probably by heterodimerization with class a basic helix-loop-helix factors. Despite the presence of an intact basic domain, does not bind to DNA (By similarity). In the brain, may function as an area-specific transcription factor that regulates the postmitotic acquisition of area identities and elucidate the genetic hierarchy between progenitors and postmitotic neurons driving neocortical arealization. [...]                                                                                                                                                                   |
| 6893                   | Myoblast determination protein 1          | Acts as a transcriptional activator that promotes transcription of muscle-specific target genes and plays a role in muscle differentiation. Together with MYF5 and MYOG, co-occupies muscle-specific gene promoter core region during myogenesis. Induces fibroblasts to differentiate into myoblasts. Interacts with and is inhibited by the twist protein. This interaction probably involves the basic domains of both proteins. [...]                                                                                                                                                                                                                                                                                                          |
| 7866                   | Neuronal PAS domain-containing protein 4  | Transcription factor expressed in neurons of the brain that regulates the excitatory-inhibitory balance within neural circuits and is required for contextual memory in the hippocampus (By similarity). Plays a key role in the structural and functional plasticity of neurons (By similarity). Acts as an early-response transcription factor in both excitatory and inhibitory neurons, where it induces distinct but overlapping sets of late-response genes in these two types of neurons, allowing the synapses that form on inhibitory and excitatory neurons to be modified by neuronal activity in a manner specific to their function within a circuit, thereby facilitating appropriate circuit responses to sensory experience. [...] |
| 9983                   | Achaete-scute homolog 2                   | AS-C proteins are involved in the determination of the neuronal precursors in the peripheral nervous system and the central nervous system.                                                                                                                                                                                                                                                                                                                                                                                                                                                                                                                                                                                                        |
| 14018                  | Fer3-like protein                         | Transcription factor that binds to the E-box and functions as inhibitor of transcription. DNA binding requires dimerization with an E protein. Inhibits transcription activation by ASCL1/MASH1 by sequestering E proteins.                                                                                                                                                                                                                                                                                                                                                                                                                                                                                                                        |

**Supplementary Table 10: Name and function of bilaterian-specific transcription factors with homeobox and bHLH domain.** Left and middle column indicate orthogroup ID and full name of the corresponding human ortholog according to UniProt. Right column shows description of the respective factor as provided by UniProt. [...] indicates that part of the description has been omitted.

| OG       | Name                      | Function                                      | Expression                                                                                                                                                                                                                                                                                                                                                                                                                                                                                                                                                                                                                                     |
|----------|---------------------------|-----------------------------------------------|------------------------------------------------------------------------------------------------------------------------------------------------------------------------------------------------------------------------------------------------------------------------------------------------------------------------------------------------------------------------------------------------------------------------------------------------------------------------------------------------------------------------------------------------------------------------------------------------------------------------------------------------|
| OG_13067 | Transmembrane protein 169 | multi-pass membrane protein, function unknown | D: CNS, ventral nerve cord, ventral midline, brain; URL: <a href="http://insitu.fruitfly.org/cgi-bin/ex/report.pl?ftype=1&amp;ftext=FBgn0037849">http://insitu.fruitfly.org/cgi-bin/ex/report.pl?ftype=1&amp;ftext=FBgn0037849</a><br><br>M: CNS and different brain regions; URL: <a href="https://www.ebi.ac.uk/gxa/genes/ENSMUSG00000026188?bs=%7B%22mus%20musculus%22%3A%5B%22ORGANISM_PART%22%5D%7D&amp;ds=%7B%22kingdom%22%3A%5B%22animals%22%5D%7D#baseline">https://www.ebi.ac.uk/gxa/genes/ENSMUSG00000026188?bs=%7B%22mus%20musculus%22%3A%5B%22ORGANISM_PART%22%5D%7D&amp;ds=%7B%22kingdom%22%3A%5B%22animals%22%5D%7D#baseline</a> |
| OG_26661 | Transmembrane protein 74B | multi-pass membrane protein, function unknown | D: not present in Ecdysozoa<br><br>M: low expression in different tissues; URL: <a href="https://www.ebi.ac.uk/gxa/genes/ENSMUSG00000044364?bs=%7B%22mus%20musculus%22%3A%5B%22ORGANISM_PART%22%5D%7D&amp;ds=%7B%22kingdom%22%3A%5B%22animals%22%5D%7D#baseline">https://www.ebi.ac.uk/gxa/genes/ENSMUSG00000044364?bs=%7B%22mus%20musculus%22%3A%5B%22ORGANISM_PART%22%5D%7D&amp;ds=%7B%22kingdom%22%3A%5B%22animals%22%5D%7D#baseline</a>                                                                                                                                                                                                    |
| OG_28197 | Transmembrane protein 160 | multi-pass membrane protein, function unknown | D: not present in Ecdysozoa<br><br>M: CNS and different brain regions; URL: <a href="https://www.ebi.ac.uk/gxa/genes/ENSMUSG00000019158?bs=%7B%22mus%20musculus%22%3A%5B%22ORGANISM_PART%22%5D%7D&amp;ds=%7B%22kingdom%22%3A%5B%22animals%22%5D%7D#baseline">https://www.ebi.ac.uk/gxa/genes/ENSMUSG00000019158?bs=%7B%22mus%20musculus%22%3A%5B%22ORGANISM_PART%22%5D%7D&amp;ds=%7B%22kingdom%22%3A%5B%22animals%22%5D%7D#baseline</a>                                                                                                                                                                                                        |

**Supplementary Table 11: Name and expression of bilaterian-specific transmembrane proteins with unknown function.** First and second column indicate orthogroup ID and full name of the corresponding human ortholog according to UniProt. Right column shows expression data as provided by the Berkeley Drosophila Genome Project for *D. melanogaster* (D) [Tomancak et al. 2002] and the EMBL Expression Atlas for *Mus musculus* (M) [Petryszak et al. 2016]. CNS: central nervous system. URLs link directly to the relevant expression data.

| OG       | Name         | OG comp.        | HMM hits     | # Species | Ancestor        | E-value       |
|----------|--------------|-----------------|--------------|-----------|-----------------|---------------|
| OG_13067 | TM169/CG4596 | 27 D; 9 L; 23 E | 1. OG_13067  | 59        | Bilateria       | $4.0e^{-126}$ |
|          |              |                 | 2. OG_761179 | 2         | Eumetazoa       | 2.0           |
|          |              |                 | 3. OG_320755 | 3         | Eumetazoa       | 2.4           |
|          |              |                 | 4. OG_522863 | 2         | <i>Acropora</i> | 5.3           |
| OG_28197 | TM160        | 22 D; 8 L; 0 E  | 1. OG_28197  | 30        | Bilateria       | $1.0e^{-103}$ |
|          |              |                 | 2. OG_453098 | 2         | Sarcopterygii   | $2.6e^{-17}$  |
|          |              |                 | 3. OG_64229  | 15        | Opisthokonta    | 0.00056       |
|          |              |                 | 4. OG_17167  | 54        | Fungi           | 0.32          |

**Supplementary Table 12: HMM-HMM search results for two transmembrane proteins with unknown function.** Orthogroup ID, corresponding gene name, and orthogroup composition is shown for two bilaterian-specific transmembrane proteins without described function. Columns 4–7 summarise results of HMM-HMM searches in our database. In column four and five, orthogroup ID and corresponding species number of the three best search hits for each query are shown. Column six and seven report last common ancestor and corresponding E-value of hit orthogroups. D = Deuterostomia; E = Ecdysozoa; L = Lophotrochozoa; n.d. = not determined.

| OG       | Name    | OG comp.                | HMM hits     | # Species | Ancestor      | E-value      |
|----------|---------|-------------------------|--------------|-----------|---------------|--------------|
| OG_26631 | CG13034 | 2 Ch; 1 My; 2 Cr; 23 He | 1. OG_26631  | 28        | Arthropoda    | $4e^{-134}$  |
|          |         |                         | 2. OG_402434 | 2         | Endopterygota | $2.7e^{-32}$ |
|          |         |                         | 3. OG_22344  | 30        | Panarthropoda | $9.8e^{-08}$ |
|          |         |                         | 4. OG_62779  | 13        | Arthropoda    | 0.34         |
| OG_34551 | CG10433 | 4 Ch; 1 My; 2 Cr; 19 He | 1. OG_34551  | 26        | Arthropoda    | $9.6e^{-56}$ |
|          |         |                         | 2. OG_330852 | 3         | Formicidae    | $7.8e^{-10}$ |
|          |         |                         | 3. OG_490587 | 2         | Obtectomera   | $1.4e^{-07}$ |
|          |         |                         | 4. OG_291047 | 3         | Neognathae    | 0.007        |
| OG_35928 | CG16926 | 2 Ch; 1 My; 0 Cr; 21 He | 1. OG_35928  | 24        | Arthropoda    | $1.4e^{-52}$ |
|          |         |                         | 2. OG_800521 | 2         | Trichoderma   | 2.6          |
|          |         |                         | 3. OG_807347 | 2         | Rhizoctonia   | 3            |
|          |         |                         | 4. OG_430491 | 2         | Gnathostomata | 3.5          |

**Supplementary Table 13: HMM-HMM search results for three uncharacterised arthropod-specific proteins.** Orthogroup ID, corresponding *D. melanogaster* gene name, and orthogroup composition is shown for three arthropod-specific proteins without described function. Columns 4–7 summarise results of HMM-HMM searches in our database. In column four and five, orthogroup ID and species number within the four best search hits for each query are shown. Column six and seven report last common ancestor and corresponding E-value of orthogroup hits. Ch = Chelicerata; Cr = Crustacea; He = Hexapoda; My = Myriapoda. Note that each query HMM detects itself as best hit. All next similar HMM-HMM hits correspond either to orthogroups within Arthropoda (Endopterygota, Panarthropoda, Formicidae, Obtectomera) or to very small, phylogenetically distant orthogroups outside arthropods with low similarity (Neognathae, Trichoderma, Rhizoctonia, Gnathostomata), illustrating that these arthropod-specific proteins do not possess related domains outside their lineage. For corresponding multiple sequence alignments, see Figure 4–Figure Supplement 1.

| OG       | Name    | OG comp.       | HMM hits     | Name    | Ancestor   | OG composition                     |
|----------|---------|----------------|--------------|---------|------------|------------------------------------|
| OG_10143 | Eomes   | 49 D; 4 L; 2 E | 1. OG_10143  | Eomes   | Bilateria  | 49 D; 4 L; 2 E                     |
|          |         |                | 2. OG_8510   | T       | Holozoa    | 1 Ic; 1 Pl; 3 Po; 6 Cn; 6 Ct; 73 B |
|          |         |                | 3. OG_242    | TBX2    | Metazoa    | 1 Pl; 4 Po; 14 Cn; 8 Ct; 127 B     |
|          |         |                | 4. OG_13145  | MGAP    | Gnathost.  | 40                                 |
| OG_10785 | EGF-CFC | 52 D; 3 L; 0 E | 1. OG_10785  | EGF-CFC | Bilateria  | 52 D; 3 L; 0 E                     |
|          |         |                | 2. OG_250903 | n.d.    | Euteleost. | 3                                  |
|          |         |                | 3. OG_124091 | n.d.    | Gnathost.  | 4                                  |
|          |         |                | 4. OG_408474 | n.d.    | Echinoida  | 2                                  |
| OG_11821 | Lefty   | 52 D; 3 L; 0 E | 1. OG_11821  | Lefty   | Bilateria  | 52 D; 3 L; 0 E                     |
|          |         |                | 2. OG_195649 | n.d.    | Gnathost.  | 3                                  |
|          |         |                | 3. OG_122960 | n.d.    | Bilateria  | 5 D; 1 L                           |
|          |         |                | 4. OG_580    | GDF3    | Metazoa    | 1 Pl; 2 Po; 15 Cn; 8 Ct; 130 B     |
| OG_12210 | Nodal   | 44 D; 6 L; 0 E | 1. OG_12210  | Nodal   | Bilateria  | 44 D; 6 L; 0 E                     |
|          |         |                | 2. OG_580    | GDF3    | Metazoa    | 1 Pl; 2 Po; 15 Cn; 8 Ct; 130 B     |
|          |         |                | 3. OG_9136   | GDF6    | Metazoa    | 2 Po; 10 Cn; 53 B                  |
|          |         |                | 4. OG_9694   | GDF2    | Bilateria  | 45 D; 5 L; 6 E                     |
| OG_36001 | FoxH1   | 23 D; 2 L; 0 E | 1. OG_36001  | FOXH1   | Bilateria  | 23 D; 2 L; 0 E                     |
|          |         |                | 2. OG_63374  | FOXH1-2 | Bilateria  | 13 D; 1 E                          |
|          |         |                | 3. OG_302079 | n.d.    | Ct         | 2                                  |
|          |         |                | 4. OG_3972   | FOXD4   | Metazoa    | 1 Pl; 4 Po; 8 Cn; 7 Ct; 109 B      |
| OG_63374 | FoxH1-2 | 13 D; 0 L; 1 E | 1. OG_63374  | FoxH1-2 | Bilateria  | 13 D; 0 L; 1 E                     |
|          |         |                | 2. OG_36001  | FoxH1   | Bilateria  | 23 D; 2 L; 0 E                     |
|          |         |                | 3. OG_11471  | FoxL1   | Metazoa    | 1 Po; 48 D; 0 E; 1 L               |
|          |         |                | 4. OG_8725   | FoxL2   | Metazoa    | 5 Po; 3 Ct; 12 Cn; 75 B            |

**Supplementary Table 14: HMM-HMM search results for Nodal pathway members.** Orthogroup ID, corresponding gene name, and orthogroup composition is shown for the five bilaterian-specific Nodal pathway genes. Columns 4–7 summarise results of HMM-HMM searches in our database. In column four and five, orthogroup ID and corresponding gene name of the three best search hits for each Nodal pathway member are shown. Column six and seven report last common ancestor and composition of hit orthogroups. Abbreviations: B = Bilateria; Cn = Cnidaria; Ct = Ctenophora; D = Deuterostomia; E = Ecdysozoa; Ic = Ichthyosporea; L = Lophotrochozoa; Pl = Placozoa; Po = Porifera. Euteleost. = Euteleostomi; Gnathost. = Gnathostomata; n.d. = not determined; T = Brachyury; TBX = T-box protein; MGAP = MAX gene-associated protein; GDF= Growth/differentiation factor; FOX= Forkhead box protein. Holozoa is common ancestor of Metazoa + Choanoflagellida + Ichthyosporea. OG\_63374 is reciprocal best hit of OG\_36001 (FoxH1) in HMM-HMM searches.

| OG       | Name                      | Outlier SeqID                                     | 4 Best hits at NCBI in Bilateria                                                                                                                                                                                                                                                                                                                           | E-value                                                                                                 |
|----------|---------------------------|---------------------------------------------------|------------------------------------------------------------------------------------------------------------------------------------------------------------------------------------------------------------------------------------------------------------------------------------------------------------------------------------------------------------|---------------------------------------------------------------------------------------------------------|
| OG_5226  | Odd-skipped-related (OSR) | 45264 trs_EZ022029.1_8.0                          | <ol style="list-style-type: none"> <li>1. XP_003512540.3 (zinc finger protein 431 [Cricetulus griseus])</li> <li>2. XP_027262642.1 (zinc finger protein 431 [Cricetulus griseus])</li> <li>3. XP_006898891.1 (zinc finger protein 699-like [Elephantulus edwardii])</li> <li>4. XP_024655672.1 (zinc finger protein 660-like [Maylandia zebra])</li> </ol> | <p>2.0e<sup>-14</sup></p> <p>2.0e<sup>-14</sup></p> <p>4.0e<sup>-14</sup></p> <p>5.0e<sup>-14</sup></p> |
|          |                           | 747676 gi_328860070                               | <ol style="list-style-type: none"> <li>1. ILLM_C (chimera of Zif23-GCN4 [Mus musculus])</li> <li>2. KOF92858.1 (OCBIM_22005869mg [Octopus bimaculoides])</li> <li>3. XP_017758395.1 (zinc finger E-box-binding [Eufriesea mexicana])</li> <li>4. XP_017758394.1 (tramtrack [Eufriesea mexicana])</li> </ol>                                                | <p>2.0e<sup>-08</sup></p> <p>6.0e<sup>-07</sup></p> <p>7.0e<sup>-07</sup></p> <p>7.0e<sup>-07</sup></p> |
|          |                           | 1126212 gi_407917167                              | <ol style="list-style-type: none"> <li>1. XP_008474334.2 (zinc finger protein 570-like [Diaphorina citri])</li> <li>2. XP_030058979.1 (E3 SUMO-protein ligase EGR2 [Microcaecilia unicolor])</li> <li>3. XP_029908092.1 (Sp7 isoform X1 [Myripristis murdjan])</li> <li>4. XP_029908093.1 (Sp7 isoform X2 [Myripristis murdjan])</li> </ol>                | <p>1.0e<sup>-10</sup></p> <p>5.0e<sup>-10</sup></p> <p>6.0e<sup>-10</sup></p> <p>7.0e<sup>-10</sup></p> |
| OG_5717  | Slit                      | 10228 gi_190582737                                | <ol style="list-style-type: none"> <li>1. XP_028966320.1 (protein slit [Galendromus occidentalis])</li> <li>2. ELU02319.1 (CAPTEDRAFT_I79696 [Capitella teleta])</li> <li>3. XP_013386132.1 (slit homolog 2 [Lingula anatina])</li> <li>4. AAI70476.1 (Slit2-a protein [Xenopus laevis])</li> </ol>                                                        | <p>0.0</p> <p>0.0</p> <p>0.0</p> <p>0.0</p>                                                             |
| OG_10143 | Eomes                     | A0A077SN37_9METZ                                  | <ol style="list-style-type: none"> <li>1. XP_012940912.1 (TBX6L-like, partial [Aplysia californica])</li> <li>2. XP_013379423.1 (TBX3 isoform X3 [Lingula anatina])</li> <li>3. XP_013379419.1 (TBX3 isoform X1 [Lingula anatina])</li> <li>4. ELT90467.1 (CAPTEDRAFT_110717 [Capitella teleta])</li> </ol>                                                | <p>2.0e<sup>-57</sup></p> <p>7.0e<sup>-57</sup></p> <p>3.0e<sup>-56</sup></p> <p>6.0e<sup>-56</sup></p> |
|          |                           | Eomes_Leucosolenia from Sebé-Pedrós et al. [2013] | <ol style="list-style-type: none"> <li>1. XP_012403491.1 (TBX4 [Sarcophilus harrisi])</li> <li>2. TWW77798.1 (TBX4 [Takifugu flavidus])</li> <li>3. XP_020847689.1 (TBX4 isoform X1 [Phascolarctos cinereus])</li> <li>4. XP_027554579.1 (TBX4 [Neopelma chrysocephalum])</li> </ol>                                                                       | <p>3.0e<sup>-58</sup></p> <p>3.0e<sup>-57</sup></p> <p>3.0e<sup>-57</sup></p> <p>4.0e<sup>-57</sup></p> |

**Supplementary Table 15: RBH Blast search for potential outliers.** First and second column: Orthogroup identifier in BigWenDB and corresponding gene name. Third column: Sequence ID of potential outliers used as query for reciprocal best hit Blast search. Fourth and fifth column show the four best hits when performing Blast searches in the non-redundant protein database at NCBI within the taxon Bilateria, and corresponding E-values.



| OG         | Name    | OG comp.          | HMM hits     | Name  | Ancestor     | OG composition                 |
|------------|---------|-------------------|--------------|-------|--------------|--------------------------------|
| OG_12210   | Nodal   | 44 D; 6 L; 0 E    | 1. OG_12210  | Nodal | Bilateria    | 44 D; 6 L; 0 E                 |
|            |         |                   | 2. OG_580    | GDF3  | Metazoa      | 1 Pl; 2 Po; 15 Cn; 8 Ct; 130 B |
|            |         |                   | 3. OG_9136   | GDF6  | Metazoa      | 2 Po; 10 Cn; 53 B              |
|            |         |                   | 4. OG_9694   | GDF2  | Bilateria    | 45 D; 5 L; 6 E                 |
| OG_9136    | GDF6    | 2 Po; 10 Cn; 53 B | 1. OG_9136   | GDF6  | Metazoa      | 2 Po; 10 Cn; 53 B              |
|            |         |                   | 2. OG_580    | GDF3  | Metazoa      | 1 Pl; 2 Po; 15 Cn; 8 Ct; 130 B |
|            |         |                   | 3. OG_9694   | GDF2  | Bilateria    | 45 D; 5 L; 6 E                 |
|            |         |                   | 4. OG_293907 | n.d.  | Ambulacraria | 3                              |
| OG_9136_Cn | GDF6_Cn | 10 Cn             | 1. OG_9136   | GDF6  | Metazoa      | 2 Po; 10 Cn; 53 B              |
|            |         |                   | 2. OG_580    | GDF3  | Metazoa      | 1 Pl; 2 Po; 15 Cn; 8 Ct; 130 B |
|            |         |                   | 3. OG_562159 | n.d.  | Hexacorallia | 2                              |
|            |         |                   | 4. OG_9694   | GDF2  | Bilateria    | 45 D; 5 L; 6 E                 |

**Supplementary Table 16: HMM-HMM search results for a putative Hydra Nodal-related gene.**

Orthogroup ID, corresponding gene name, and orthogroup composition is shown for Nodal and a *Hydra magnipapillata* Nodal-related gene as published in [Watanabe et al. 2014]. Columns 4–7 summarise results of HMM-HMM searches in our database. In column four and five, orthogroup ID and corresponding gene name of the four best search hits for each query are shown. Column six and seven report last common ancestor and composition of hit orthogroups. Abbreviations: B = Bilateria; Cn = Cnidaria; Ct = Ctenophora; D = Deuterostomia; E = Ecdysozoa; L = Lophotrochozoa; Pl = Placozoa; Po = Porifera; n.d. = not determined; GDF= Growth/differentiation factor. Note that each query HMM detects itself as best hit. OG\_12210 (Nodal), OG\_9136 (containing *Hydra* Nodal-related), and OG\_9136\_Cn, containing only cnidarian Nodal-related genes, are not engaged in a reciprocal best hit relationship in HMM-HMM searches, arguing against a common evolutionary origin.

| OG       | Name                                                     | OG comp.         | HMM hits     | OG comp.              | Ancestor   | E-value       |
|----------|----------------------------------------------------------|------------------|--------------|-----------------------|------------|---------------|
| OG_278   | 5HT1A_HUMAN<br>5-hydroxy-tryptamine receptor 1A          | D 55; E 44; L 14 | 1. OG_278    | D 55; E 44; L 14      | Bilateria  | $9.0e^{-115}$ |
|          |                                                          |                  | 2. OG_38825  | D 14; E 3; L 1        | Bilateria  | $4.1e^{-74}$  |
|          |                                                          |                  | 3. OG_20041  | D 1; E 25; L 2        | Bilateria  | $6.7e^{-72}$  |
|          |                                                          |                  | 4. OG_87181  | D 6                   | Deuterost. | $2.0e^{-70}$  |
| OG_1451  | SSR5_HUMAN<br>Somatostatin receptor type 5               | D 59; E 44; L 10 | 1. OG_1451   | D 59; E 44; L 10      | Bilateria  | $2.0e^{-166}$ |
|          |                                                          |                  | 2. OG_197068 | 2                     | Gnathost.  | $3.5e^{-84}$  |
|          |                                                          |                  | 3. OG_17701  | Ct 1; D 34            | Eumeta.    | $2.3e^{-81}$  |
|          |                                                          |                  | 4. OG_22358  | D 28                  | Deuterost. | $6.3e^{-77}$  |
| OG_6712  | DRD2_HUMAN<br>D(2) dopamine receptor                     | D 47; E 33; L 7  | 1. OG_6712   | D 47; E 33; L 7       | Bilateria  | $1.0e^{-252}$ |
|          |                                                          |                  | 2. OG_87181  | D 6                   | Deuterost. | $1.5e^{-88}$  |
|          |                                                          |                  | 3. OG_91943  | 8                     | Nematoda   | $9.0e^{-88}$  |
|          |                                                          |                  | 4. OG_20041  | D 1; E 25; L 2        | Bilateria  | $1.7e^{-87}$  |
| OG_6895  | SCTR_HUMAN<br>Secretin receptor                          | D 53; E 12; L 9  | 1. OG_6895   | D 53; E 12; L 9       | Bilateria  | $2.0e^{-246}$ |
|          |                                                          |                  | 2. OG_7679   | D 52; E 0; L 2        | Bilateria  | $2.0e^{-124}$ |
|          |                                                          |                  | 3. OG_8480   | D 53; E 1; L 0        | Bilateria  | $7.0e^{-108}$ |
|          |                                                          |                  | 4. OG_23947  | 36                    | Gnathost.  | $1.0e^{-102}$ |
| OG_7773  | CRFR2_HUMAN<br>Corticotropin-releasing factor receptor 2 | D 39; E 38; L 11 | 1. OG_7773   | D 39; E 38; L 11      | Bilateria  | $1.0e^{-176}$ |
|          |                                                          |                  | 2. OG_6895   | D 53; E 12; L 9       | Bilateria  | $5.8e^{-87}$  |
|          |                                                          |                  | 3. OG_13184  | Cn 1; D 6; E 40; L 7  | Eumeta.    | $1.0e^{-83}$  |
|          |                                                          |                  | 4. OG_80843  | D 1; E 9; L 0         | Bilateria  | $4.8e^{-83}$  |
| OG_8006  | CALCR_HUMAN<br>Calcitonin receptor                       | D 44; E 31; L 9  | 1. OG_8006   | D 44; E 31; L 9       | Bilateria  | $4.0e^{-152}$ |
|          |                                                          |                  | 2. OG_110397 | 8                     | Gnathost.  | $1.0e^{-93}$  |
|          |                                                          |                  | 3. OG_20497  | 30                    | Protost.   | $7.4e^{-83}$  |
|          |                                                          |                  | 4. OG_7773   | D 39; E 38; L 11      | Bilateria  | $1.2e^{-74}$  |
| OG_16379 | NMUR2_HUMAN<br>Neuromedin-U receptor 2                   | D 9; E 15; L 12  | 1. OG_16379  | D 9; E 15; L 12       | Bilateria  | $6.5e^{-54}$  |
|          |                                                          |                  | 2. OG_3925   | Cn 2; D 51; E 41; L 8 | Eumeta.    | $5.5e^{-35}$  |
|          |                                                          |                  | 3. OG_135144 | D 2; E 4; L 0         | Bilateria  | $1.4e^{-30}$  |
|          |                                                          |                  | 4. OG_155343 | D 4; E 1; L 0         | Bilateria  | $1.0e^{-25}$  |
| OG_34259 | ADA2B_HUMAN<br>Alpha-2B adrenergic receptor              | D 7; E 10; L 6   | 1. OG_34259  | D 7; E 10; L 6        | Bilateria  | $1.1e^{-69}$  |
|          |                                                          |                  | 2. OG_23231  | Cn 2; D 3; E 18; L 6  | Eumeta.    | $5.9e^{-46}$  |
|          |                                                          |                  | 3. OG_38825  | D 14; E 3; L 1        | Bilateria  | $8.1e^{-43}$  |
|          |                                                          |                  | 4. OG_87181  | D 6                   | Deuterost. | $2.1e^{-41}$  |

**Supplementary Table 17: HMM-HMM search results for bilaterian-specific G protein-coupled receptors.** Orthogroup ID, corresponding human gene name (UniProt ID), and orthogroup composition is shown for eight bilaterian-specific G protein-coupled receptor proteins. Columns 4–7 summarise results of HMM-HMM searches. Columns four and five show orthogroup ID and composition of the four best search hits for each query HMM. Columns six and seven report their last common ancestor and corresponding E-value. Cn = Cnidaria; Ct = Ctenophora; D/Deuterost. = Deuterostomia; E = Ecdysozoa; Eumeta. = Eumetazoa; Gnathost. = Gnathostomata; L = Lophotrochozoa; Protost. = Protostomia. Note that each query HMM detects itself as best hit. Most next similar hits correspond to orthogroups within Bilateria (Deuterostomia, Gnathostomata, Nematoda, Protostomia). Four HMM-HMM hits belong to more ancient orthogroups with the potential to shift the inferred bilaterian ancestor (highlighted in red), but in all these cases hit orthogroup composition does not support a (eu)metazoan ancestor on a broad phylogenetic basis as only one or two non-bilaterian species are present. In addition, the reciprocal best hit criterion is not fulfilled in all but one case (OG\_23231), arguing that most of the eight GPCRs originated in the ancestor of bilaterians.

| OG       | OG comp.              | HMM hits     | OG comp.              | Ancestor      | E-value       |
|----------|-----------------------|--------------|-----------------------|---------------|---------------|
| OG_17701 | Ct 1; D 34            | 1. OG_17701  | Ct 1; D 34            | Metazoa       | $8.0e^{-183}$ |
|          |                       | 2. OG_161673 | 4                     | Sarcopterygii | $8.0e^{-118}$ |
|          |                       | 3. OG_1451   | D 59; E 44; L 10      | Bilateria     | $2.4e^{-84}$  |
|          |                       | 4. OG_95038  | 9                     | Gnathostomata | $3.2e^{-81}$  |
| OG_13184 | Cn 1; D 6; E 40; L 7  | 1. OG_13184  | Cn 1; D 6; E 40; L 7  | Eumetazoa     | $5.0e^{-264}$ |
|          |                       | 2. OG_7773   | D 39; E 38; L 11      | Bilateria     | $2.6e^{-84}$  |
|          |                       | 3. OG_35449  | Cn 6; D 3; E 10; L 3  | Eumetazoa     | $1.3e^{-82}$  |
|          |                       | 4. OG_6895   | D 53; E 12; L 9       | Bilateria     | $6.5e^{-78}$  |
| OG_3925  | Cn 2; D 51; E 41; L 8 | 1. OG_3925   | Cn 2; D 51; E 41; L 8 | Eumetazoa     | $1.0e^{-139}$ |
|          |                       | 2. OG_14939  | Cn 1; D 45; E 1       | Eumetazoa     | $3.7e^{-76}$  |
|          |                       | 3. OG_187053 | D 2; L 2              | Bilateria     | $3.1e^{-61}$  |
|          |                       | 4. OG_2778   | Pl 1; Po 1; B 105     | Metazoa       | $2.5e^{-60}$  |
| OG_23231 | Cn 2; D 3; E 18; L 6  | 1. OG_23231  | Cn 2; D 3; E 18; L 6  | Eumetazoa     | $4.6e^{-98}$  |
|          |                       | 2. OG_34259  | D 7; E 10; L 6        | Bilateria     | $1.2e^{-45}$  |
|          |                       | 3. OG_38825  | D 14; E 3; L 1        | Bilateria     | $9.6e^{-40}$  |
|          |                       | 4. OG_1412   | Pl 1; Cn 2; B 111     | Metazoa       | $1.1e^{-38}$  |

**Supplementary Table 18: Reverse HMM-HMM search results for GPCR hits with metazoan ancestor.** Orthogroup ID and composition is shown for four orthogroups of Supplementary Table 17 with a best HMM-HMM hit relationship to bilaterian-specific GPCRs and origin prior to the bilaterian ancestor. Columns 3–6 summarise results of HMM-HMM searches in our database. In column three and four, orthogroup ID and composition of the four best search hits for each query HMM are shown. Columns five and six report their last common ancestor and corresponding E-value. B = Bilateria; Cn = Cnidaria; Ct = Ctenophora; D = Deuterostomia; E = Ecdysozoa; L = Lophotrochozoa; Pl = Placozoa; Po = Porifera. Note that each query HMM detects itself as best hit. The HMM-HMM analysis indicates that no reciprocal best-hit orthogroups for the bilaterian-specific GPCRs of Supplementary Table 17 exist in non-bilaterian metazoans, supporting the bilaterian origin of these GPCRs.

| OG       | Name                                       | OG comp.                              | HMM hits     | OG comp.                                     | Ancestor  | E-value       |
|----------|--------------------------------------------|---------------------------------------|--------------|----------------------------------------------|-----------|---------------|
| OG_3707  | Netrin                                     | Pl 1; Po 1; Cn 10<br>D 55; E 41; L 13 | 1. OG_3707   | Pl 1; Po 1; Cn 10<br>D 55; E 41; L 13        | Metazoa   | $2.0e^{-119}$ |
|          |                                            |                                       | 2. OG_19436  | Po 1; Cn 3; D 11<br>E 11; L 10               | Metazoa   | $2.2e^{-84}$  |
|          |                                            |                                       | 3. OG_4825   | Pl 1; Po 2; Ct 4<br>Cn 8; D 60; E 40<br>L 10 | Metazoa   | $1.4e^{-76}$  |
|          |                                            |                                       | 4. OG_9036   | Cn 8; D 44; E 1<br>L 4                       | Eumetazoa | $5.0e^{-41}$  |
| OG_5220  | DCC,<br>Deleted in<br>Colorectal<br>Cancer | Pl 1; Po 1; Cn 12<br>D 44; E 44; L 11 | 1. OG_5220   | Pl 1; Po 1; Cn 12<br>D 44; E 44; L 11        | Metazoa   | $0.0e^0$      |
|          |                                            |                                       | 2. OG_5970   | Po 1; Cn 6; D 54<br>E 15; L 7                | Metazoa   | $3.0e^{-128}$ |
|          |                                            |                                       | 3. OG_4128   | Pl 1; Cn 1; D 52<br>E 39; L 8                | Metazoa   | $1.6e^{-88}$  |
|          |                                            |                                       | 4. OG_5220   | Pl 1; Po 1; Cn 12<br>D 44; E 44; L 11        | Metazoa   | $4.6e^{-83}$  |
| OG_5717  | Slit                                       | Pl 1; D 46; E 41<br>L 12              | 1. OG_5717   | Pl 1; D 46; E 41<br>L 12                     | Metazoa   | $7.0e^{-249}$ |
|          |                                            |                                       | 2. OG_59323  | Po 1; D 4; E 6<br>L 5                        | Metazoa   | $1.1e^{-68}$  |
|          |                                            |                                       | 3. OG_5717   | Pl 1; D 46; E 41<br>L 12                     | Metazoa   | $5.9e^{-61}$  |
|          |                                            |                                       | 4. OG_6995   | Cn 1; D 35; E 48<br>L 13                     | Eumetazoa | $1.6e^{-53}$  |
| OG_4128  | Robo,<br>Round-<br>About                   | Pl 1; Cn 1; D 52<br>E 39; L 8         | 1. OG_4128   | Pl 1; Cn 1; D 52<br>E 39; L 8                | Metazoa   | $0.0e^0$      |
|          |                                            |                                       | 2. OG_153953 | Cn 1; L 3                                    | Eumetazoa | $4.0e^{-121}$ |
|          |                                            |                                       | 3. OG_11356  | Cn 1; D 49                                   | Eumetazoa | $6.0e^{-119}$ |
|          |                                            |                                       | 4. OG_135605 | Cn 1; E 5                                    | Eumetazoa | $6.0e^{-111}$ |
|          |                                            |                                       | 5. OG_51853  | Cn 9                                         | Cnidaria  | $1.0e^{-95}$  |
| OG_51853 | Cnidarian<br>Robo                          | Cnidaria 9                            | 1. OG_51853  | Cn 9                                         | Cnidaria  | $0.0e^0$      |
|          |                                            |                                       | 2. OG_4128   | Pl 1; Cn 1; D 52<br>E 39; L 8                | Metazoa   | $1.1e^{-98}$  |
|          |                                            |                                       | 3. OG_232708 | 3                                            | Hydrozoa  | $1.1e^{-67}$  |
|          |                                            |                                       | 4. OG_5970   | Po 1; Cn 6; D 54<br>E 15; L 7                | Metazoa   | $2.1e^{-60}$  |

**Supplementary Table 19: HMM-HMM search results for two major axon guidance pathways.**

Orthogroup ID, corresponding gene name, and orthogroup composition is shown for the Netrin-DCC and Slit-Robo axon guidance molecules. Columns 4–7 summarise results of HMM-HMM searches in our database. In column four and five, orthogroup ID and composition of the four best search hits for each query HMM are shown. Columns six and seven report their last common ancestor and corresponding E-value. Cn = Cnidaria; Ct = Ctenophora; D = Deuterostomia; E = Ecdysozoa; L = Lophotrochozoa; Pl = Placozoa; Po = Porifera. Note that each query HMM detects itself as best hit. OG\_51853 is the reciprocal best hit in cnidarians (green highlight) of Robo orthogroup OG\_4128, suggesting a (eu)metazoan origin of this receptor. Similarly, the composition of the Netrin and DCC orthogroups and of their HMM search hits suggests a pre-bilaterian origin of these factors.

| OG      | Name       | OG comp.                             | Description                                                                                                                                                                                                                                                                                                                                                                                                     |
|---------|------------|--------------------------------------|-----------------------------------------------------------------------------------------------------------------------------------------------------------------------------------------------------------------------------------------------------------------------------------------------------------------------------------------------------------------------------------------------------------------|
| OG_2290 | ENAH_HUMAN | Pl 1; Po 3; Ct 8; Cn 12; B 122       | Ena/VASP proteins are actin-associated proteins involved in a range of processes dependent on cytoskeleton remodeling and cell polarity such as axon guidance and lamellipodial and filopodial dynamics in migrating cells. ENAH induces the formation of F-actin rich outgrowths in fibroblasts. Acts synergistically with BAIAP2-alpha and downstream of NTN1 to promote filipodia formation (By similarity). |
|         | ENA_DROME  |                                      | Functions, together with Abl, trio, and fra, in a complex signalling network that regulates axon guidance at the CNS midline. Required in part for Robo-mediated repulsive axon guidance. May be involved in lamellipodial dynamics.                                                                                                                                                                            |
| OG_1379 | SOS1_HUMAN | F 77; Pl 1; Po 5; Ct 9; Cn 14; B 101 | Promotes the exchange of Ras-bound GDP by GTP (PubMed:8493579). Probably by promoting Ras activation, regulates phosphorylation of MAP kinase MAPK3 in response to EGF (PubMed:17339331). Catalytic component of a trimeric complex that participates in transduction of signals from Ras to Rac by promoting the Rac-specific guanine nucleotide exchange factor (GEF) activity (By similarity).               |
|         | SOS_DROME  |                                      | Promotes the exchange of Ras-bound GDP by GTP. Functions in signalling pathways initiated by the sevenless and epidermal growth factor receptor tyrosine kinases; implies a role for the ras pathway in neuronal development.                                                                                                                                                                                   |

**Supplementary Table 20: Ancient origin of Robo downstream signalling components.** Orthogroup ID, corresponding gene name, orthogroup composition, and available information is shown for two known members of the Robo downstream signalling cascade, the Ena/VASP protein “Enabled” and the guanyl-nucleotide exchange factor “Son of sevenless”. Description is taken from UniProt. B = Bilateria; Cn = Cnidaria; Ct = Ctenophora; F = Fungi; Pl = Placozoa; Po = Porifera.

| OG       | Name | OG comp.    | HMM hits    | OG comp.                | Ancestor  | E-value       |
|----------|------|-------------|-------------|-------------------------|-----------|---------------|
| OG_5717  | Slit | Pl 1; B 103 | 1. OG_5717  | Pl 1; B 103             | Metazoa   | $7.0e^{-249}$ |
|          |      |             | 2. OG_59323 | Po 1; B 16              | Metazoa   | $1.1e^{-68}$  |
|          |      |             | 3. OG_5717  | Pl 1; B 103             | Metazoa   | $5.9e^{-61}$  |
|          |      |             | 4. OG_6995  | Cn 1; B 96              | Eumetazoa | $1.6e^{-53}$  |
| OG_59323 |      | Po 1; B 16  | 1. OG_59323 | Po 1; B 16              | Metazoa   | $3.0e^{-166}$ |
|          |      |             | 2. OG_5717  | Pl 1; B 103             | Metazoa   | $6.1e^{-71}$  |
|          |      |             | 3. OG_48441 | Cn 4; B 13              | Eumetazoa | $1.6e^{-30}$  |
|          |      |             | 4. OG_7809  | Pl 1; Po 4; Cn 11; B 33 | Metazoa   | $7.7e^{-29}$  |
| OG_6995  |      | Cn 1; B 96  | 1. OG_6995  | Cn 1; B 96              | Eumetazoa | $2.0e^{-160}$ |
|          |      |             | 2. OG_59370 | D 3; E 0; L 1           | Bilateria | $8.8e^{-89}$  |
|          |      |             | 3. OG_10044 | D 37; E 0; L 4          | Bilateria | $1.4e^{-87}$  |
|          |      |             | 4. OG_8851  | Cn 1; B 61              | Eumetazoa | $2.2e^{-84}$  |

**Supplementary Table 21: HMM-HMM search results for the bilaterian-specific Slit orthogroup.**

Orthogroup ID, corresponding human gene name, and orthogroup composition is shown for the Slit orthogroup and two of its HMM search hits. Columns 4–7 summarise results of HMM-HMM searches in our database. In column four and five, orthogroup ID and composition of the four best search hits for each query HMM are shown. Columns six and seven report their last common ancestor and corresponding E-value. Cn = Cnidaria; D = Deuterostomia; E = Ecdysozoa; L = Lophotrochozoa; Pl = Placozoa; Po = Porifera. OG\_59323 contains genomic and transcriptomic ORFs of 16 bilaterian species and a sponge and is the reciprocal best hit of Slit OG\_5717. Its single outlier, a sequence from the sponge *Crella elegans*, belongs to the EGF superfamily and is more similar to protocadherins and Notch than to Slit. The other orthogroup members are Slit protein fragments that were not included into Slit OG\_5717. These HMM-HMM comparisons support the bilaterian ancestry of Slit.

| OG       | Name                                             | OG comp.       | HMM hits     | OG comp.                         | Ancestor    | E-value       |
|----------|--------------------------------------------------|----------------|--------------|----------------------------------|-------------|---------------|
| OG_14798 | NGF,<br>Nerve Growth<br>Factor                   | D 37; E 3; L 2 | 1. OG_14798  | D 37; E 3; L 2                   | Bilat       | $2.0e^{-138}$ |
|          |                                                  |                | 2. OG_21801  | D 26; E 2; L 4                   | Bilat       | $3.0e^{-54}$  |
|          |                                                  |                | 3. OG_113491 | D 2; E 1; L 4                    | Bilat       | $2.4e^{-18}$  |
|          |                                                  |                | 4. OG_481165 | 2                                | Deuterost   | $4.7e^{-09}$  |
| OG_21801 | BDNF,<br>Brain-derived<br>Neurotrophic<br>Factor | D 26; E 2; L 4 | 1. OG_21801  | D 26; E 2; L 4                   | Bilat       | $8.0e^{-240}$ |
|          |                                                  |                | 2. OG_14798  | D 37; E 3; L 2                   | Bilat       | $6.7e^{-54}$  |
|          |                                                  |                | 3. OG_113491 | D 2; E 1; L 4                    | Bilat       | $3.7e^{-16}$  |
|          |                                                  |                | 4. OG_5071   | Pl 1; Po 6; Cn 12<br>Ct 9; B 103 | Opisthok    | $2.8e^{-10}$  |
| OG_14798 | NT3,<br>Neuro-<br>trophin 3                      | D 37; E 3; L 2 | 1. OG_14798  | D 37; E 3; L 2                   | Bilat       | $2.0e^{-138}$ |
|          |                                                  |                | 2. OG_21801  | D 26; E 2; L 4                   | Bilat       | $3.0e^{-54}$  |
|          |                                                  |                | 3. OG_113491 | D 2; E 1; L 4                    | Bilat       | $2.4e^{-18}$  |
|          |                                                  |                | 4. OG_481165 | 2                                | Deuterost   | $4.7e^{-09}$  |
| OG_21801 | NT4,<br>Neuro-<br>trophin 4                      | D 26; E 2; L 4 | 1. OG_21801  | D 26; E 2; L 4                   | Bilat       | $8.0e^{-240}$ |
|          |                                                  |                | 2. OG_14798  | D 37; E 3; L 2                   | Bilat       | $6.7e^{-54}$  |
|          |                                                  |                | 3. OG_113491 | D 2; E 1; L 4                    | Bilat       | $3.7e^{-16}$  |
|          |                                                  |                | 4. OG_5071   | Pl 1; Po 6; Cn 12<br>Ct 9; B 103 | Opisthok    | $2.8e^{-10}$  |
| OG_20167 | CNTF,<br>Ciliary<br>Neurotrophic<br>Factor       | Euteleost 34   | 1. OG_20167  | 34                               | Euteleost   | $9.0e^{-248}$ |
|          |                                                  |                | 2. OG_124946 | 5                                | Clupeoceph  | $1.0e^{-126}$ |
|          |                                                  |                | 3. OG_578800 | 2                                | Pseudocreni | $1.3e^{-95}$  |
|          |                                                  |                | 4. OG_455713 | 2                                | Sarcopter   | $5.2e^{-93}$  |
| OG_20569 | IGF-1,<br>Insulin-like<br>Growth<br>Factor 1     | D 37; E 4; L 0 | 1. OG_20569  | D 37; E 4; L 0                   | Bilat       | $2.0e^{-122}$ |
|          |                                                  |                | 2. OG_36002  | 25                               | Gnathost    | $3.6e^{-28}$  |
|          |                                                  |                | 3. OG_197349 | 4                                | Gnathost    | $1.2e^{-21}$  |
|          |                                                  |                | 4. OG_438317 | 2                                | Gnathost    | $9.3e^{-19}$  |
| OG_36002 | IGF-2,<br>Insulin-like<br>Growth<br>Factor 2     | Gnathost 25    | 1. OG_36002  | 25                               | Gnathost    | $2.0e^{-122}$ |
|          |                                                  |                | 2. OG_276483 | 3                                | Gnathost    | $2.2e^{-36}$  |
|          |                                                  |                | 3. OG_20569  | D 37; E 4; L 0                   | Bilat       | $1.4e^{-28}$  |
|          |                                                  |                | 4. OG_427655 | 2                                | Gnathost    | $4.1e^{-26}$  |

**Supplementary Table 22: HMM-HMM search results for neurotrophic growth factors, part 1.**

Orthogroup ID, corresponding human gene name, and orthogroup composition is shown for the known vertebrate neurotrophic growth factors. Columns 4–7 summarise results of HMM-HMM searches in our database. In column four and five, orthogroup ID and composition of the four best search hits for each query HMM are shown. Columns six and seven report their last common ancestor and corresponding E-value. B/Bilat = Bilateria; Clupeoceph = Clupeocephala; Cn = Cnidaria; Ct = Ctenophora; D/Deuterost. = Deuterostomia; E = Ecdysozoa; Euteleost = Euteleostomi; Gnathost. = Gnathostomata; L = Lophotrochozoa; Opisthok = Opisthokonta; Pl = Placozoa; Po = Porifera; Pseudocreni = Pseudocrenilabrinae; Sarcopter = Sarcopterygii. Note that each query HMM detects itself as best hit. In most cases, the next similar HMM hits correspond to orthogroups within Bilateria (e. g. Deuterostomia, Gnathostomata, Sarcopterygii). Exceptions are OG\_5071, which constitutes an evolutionary old component of the R2TP complex that is involved in snoRNP biogenesis and RNA polymerase II assembly; OG\_5812, that belongs to the PDGF/VEGF family and originated in the eumetazoan ancestor; and OG\_119370, that contains TGF- $\beta$  family members of cnidarians. These HMM-HMM comparisons could not reveal factors related to neurotrophins in non-bilaterian metazoans, arguing that neurotrophic growth factors are a bilaterian innovation and diversified further during vertebrate evolution (see Figure 7, and Supplementary Table 23 for part 2 of the table).

| OG       | Name                                                          | OG comp.        | HMM hits     | OG comp.          | Ancestor       | E-value       |
|----------|---------------------------------------------------------------|-----------------|--------------|-------------------|----------------|---------------|
| OG_36013 | LIF,<br>Leukemia<br>Inhibitory<br>Factor                      | Sarcopter 25    | 1. OG_36013  | 25                | Sarcopter      | $8.9e^{-80}$  |
|          |                                                               |                 | 2. OG_140291 | 6                 | Clupeoceph     | 0.00019       |
|          |                                                               |                 | 3. OG_33370  | 25                | Euteleost      | 0.00044       |
|          |                                                               |                 | 4. OG_34716  | 26                | Eutheria       | 0.019         |
| OG_28284 | SCF,<br>Stem Cell<br>Factor                                   | Gnathost 24     | 1. OG_28284  | 24                | Gnathost       | $6.0e^{-156}$ |
|          |                                                               |                 | 2. OG_265601 | 2                 | Gnathost       | $2.5e^{-20}$  |
|          |                                                               |                 | 3. OG_95041  | 7                 | Neopterygii    | $7.5e^{-17}$  |
|          |                                                               |                 | 4. OG_138728 | 2                 | Gnathost       | 0.54          |
| OG_10688 | PDGF*,<br>Platelet-<br>Derived Growth<br>Factor               | D 46; E 1; L 0  | 1. OG_10688  | D 46; E 1; L 0    | Bilat          | $2.0e^{-111}$ |
|          |                                                               |                 | 2. OG_263502 | 3                 | Gnathost       | $2.0e^{-14}$  |
|          |                                                               |                 | 3. OG_5812   | Cn 17; Ct 0; B 62 | Eumetazoa      | $1.2e^{-12}$  |
|          |                                                               |                 | 4. OG_263501 | 3                 | Gnathost       | $1.7e^{-12}$  |
| OG_32190 | GDNF, Glial<br>Cell Line-<br>Derived Neuro-<br>trophic Factor | Gnathost 22     | 1. OG_32190  | 22                | Gnathost       | $1.0e^{-122}$ |
|          |                                                               |                 | 2. OG_10692  | 47                | Gnathost       | $1.1e^{-33}$  |
|          |                                                               |                 | 3. OG_219414 | 3                 | Laurasiatheria | $3.8e^{-08}$  |
|          |                                                               |                 | 4. OG_119370 | Cn 5; D 1; L 1    | Eumetazoa      | $9.0e^{-07}$  |
| OG_10692 | NTN,<br>Neurturin                                             | Gnathost 47     | 1. OG_10692  | 47                | Gnathost       | $1.3e^{-79}$  |
|          |                                                               |                 | 2. OG_32190  | 22                | Gnathost       | $2.4e^{-32}$  |
|          |                                                               |                 | 3. OG_219414 | 3                 | Laurasiatheria | $2.5e^{-12}$  |
|          |                                                               |                 | 4. OG_119370 | Cn 5; D 1; L 1    | Eumetazoa      | $1.0e^{-05}$  |
| OG_10692 | PSP,<br>Persephin                                             | Gnathost 47     | 1. OG_10692  | 47                | Gnathost       | $1.3e^{-79}$  |
|          |                                                               |                 | 2. OG_32190  | 22                | Gnathost       | $2.4e^{-32}$  |
|          |                                                               |                 | 3. OG_219414 | 3                 | Laurasiatheria | $2.5e^{-12}$  |
|          |                                                               |                 | 4. OG_119370 | Cn 5; D 1; L 1    | Eumetazoa      | $1.0e^{-05}$  |
| OG_10867 | NDNF,<br>Neuron-Derived<br>Neurotrophic<br>Factor             | D 31; E 22; L 9 | 1. OG_10867  | D 31; E 22; L 9   | Bilat          | $5.0e^{-176}$ |
|          |                                                               |                 | 2. OG_93467  | 10                | Diptera        | $4.2e^{-28}$  |
|          |                                                               |                 | 3. OG_210202 | D 3; E 0; L 1     | Bilat          | $2.4e^{-27}$  |
|          |                                                               |                 | 4. OG_70191  | 13                | Endopterygota  | $3.5e^{-24}$  |

**Supplementary Table 23: HMM-HMM search results for neurotrophic growth factors, part 2.** Caption see Supplementary Table 22. \* The ecdysozoan sequence in this orthogroup is from *Priapulys caudatus*, very short, and unlike PDGF. A more correct ancestor for this group is therefore “Gnathostomata” (as summarized in Figure 7).



| OG          | Name               | HMM hits       | OG comp.                       | Ancestor     | E-value       |
|-------------|--------------------|----------------|--------------------------------|--------------|---------------|
| OG_67       | Rtk and Rors       | 1. OG_67       | Pl 1; Po 5; Ct 9; Cn 17; B 128 | Opisthokonta | $2.0e^{-193}$ |
|             | n.d.               | 2. OG_13941    | Po 3; Ct 1; B 5                | Opisthokonta | $1.9e^{-87}$  |
|             | ROS fusion protein | 3. OG_7862     | Po 4; B 96                     | Opisthokonta | $4.0e^{-85}$  |
|             | Insulin receptor   | 4. OG_3768     | Pl 1; Po 1; Cn 10; B 116       | Opisthokonta | $8.9e^{-79}$  |
| OG_8965-1.4 | Rtk                | 1. OG_8965-1.4 | D 45; E 6; L 8                 | Bilateria    | n.d.          |
|             | Rtk and Rors       | 2. OG_67       | Pl 1; Po 5; Ct 9; Cn 17; B 128 | Opisthokonta | $6.6e^{-86}$  |
|             | n.d.               | 3. OG_53135    | Po 1; Ct 1; B 14               | Metazoa      | $3.9e^{-84}$  |
|             | n.d.               | 4. OG_13941    | Po 3; Ct 1; B 5                | Opisthokonta | $1.6e^{-69}$  |
| OG_6493-1.4 | Rors               | 1. OG_6493-1.4 | Po 4; Cn 12; B 96              | Opis/Metazoa | n.d.          |
|             | Rtk and Rors       | 2. OG_67       | Pl 1; Po 5; Ct 9; Cn 17; B 128 | Opisthokonta | $8.0e^{-91}$  |
|             | n.d.               | 3. OG_13941    | Po 3; Ct 1; B 5                | Opisthokonta | $9.7e^{-78}$  |
|             | ROS fusion protein | 4. OG_7862     | Po 4; B 96                     | Opisthokonta | $2.3e^{-68}$  |

**Supplementary Table 24: HMM-HMM search results for neurotrophin receptors of the Rtk family.** Orthogroup ID, corresponding human gene name, and HMM-HMM search results (columns 3–6) are shown for neurotrophin receptors of the Rtk family, derived from two different clusterings with inflation parameter 1.3 (first block of rows) and 1.4 (second and third block of rows). In column three and four, orthogroup ID and composition of the four best search hits for each query HMM are shown; their corresponding gene name, if available, is indicated in column two. Columns five and six report their last common ancestor and corresponding E-value. B = Bilateria; Cn = Cnidaria; Ct = Ctenophora; D = Deuterostomia; E = Ecdysozoa; L = Lophotrochozoa; Opis = Opisthokonta; Pl = Placozoa; Po = Porifera. n.d. = not determined. While Rtk and Rors are erroneously combined in a large orthogroup with ancient origin (OG\_67) under inflation parameter 1.3, this orthogroup is split in two parts with inflation parameter 1.4: a **bilaterian-specific** orthogroup containing Rtk (OG\_8965-1.4) and a second orthogroup with more ancient origin containing Rors (OG\_6493-1.4). Note that each query HMM detects itself as best hit.

| <b>#OGs</b>   | <b>Taxon</b>     | <b>Phylum</b> |
|---------------|------------------|---------------|
| 132,945       | Ctenophora       | Ctenophora    |
| 100,900       | Eumetazoa        | —             |
| 80,848        | Gnathostomata    | Vertebrata    |
| 76,441        | Acropora         | Cnidaria      |
| 48,993        | Metazoa          | —             |
| 47,457        | Anthozoa         | Cnidaria      |
| <b>42,946</b> | <b>Bilateria</b> | —             |
| 32,196        | Echinoida        | Echinodermata |
| 30,941        | Sarcopterygii    | Vertebrata    |
| 14,446        | Opisthokonta     | —             |
| 12,807        | Hexacorallia     | Cnidaria      |
| 12,154        | Protostomia      | —             |
| 10,387        | Scleractinia     | Cnidaria      |
| 8,531         | Astrocoeniina    | Cnidaria      |
| 7,513         | Actiniaria       | Cnidaria      |
| 7,432         | Bolinopsidae     | Ctenophora    |
| 7,273         | Deuterostomia    | —             |
| 6,961         | Lophotrochozoa   | —             |
| 5,998         | Mollusca         | Mollusca      |
| 5,611         | Caenorhabditis   | Nematoda      |

**Supplementary Table 25: Top20 counts of orthologous group ancestors in BigWenDB.** Columns indicate the number of orthologous groups specific for a given taxonomic group, its respective taxon, and the phylum to which this taxon belongs, if applicable. Numbers represent raw counts after determining group ancestors and may include false positives.

| OG      | Name                                  | OG comp.        | HMM hits     | OG comp.                              | Ancestor     | E-value             |
|---------|---------------------------------------|-----------------|--------------|---------------------------------------|--------------|---------------------|
| OG_5543 | Evi1<br>(MECOML_HUMAN)                | F 1; B 108      | 1. OG_5543   | F 1; B 108                            | Bilateria    | 0e <sup>-</sup>     |
|         |                                       |                 | 2. OG_7678   | Cn 1; Ct 1; B 17                      | Metazoa      | 1.6e <sup>-55</sup> |
|         |                                       |                 | 3. OG_26723  | 25                                    | Theria       | 1.5e <sup>-54</sup> |
|         |                                       |                 | 4. OG_2359   | F 79; Pl 1; Po 6;<br>Cn 9; Ct 8; B 95 | Opisthokonta | 3.9e <sup>-54</sup> |
| OG_5226 | odd-skipped related 1<br>(OSR1_HUMAN) | F 3; Cn 1; B 91 | 1. OG_5226   | F 3; Cn 1; B 91                       | Opisthokonta | 1.4e <sup>-36</sup> |
|         |                                       |                 | 2. OG_132128 | Cn 1; B 5                             | Eumetazoa    | 3.4e <sup>-28</sup> |
|         |                                       |                 | 3. OG_59120  | 13                                    | Protostomia  | 1.5e <sup>-22</sup> |
|         |                                       |                 | 4. OG_24005  | Cn 5; B 8                             | Eumetazoa    | 1.2e <sup>-19</sup> |

**Supplementary Table 26: HMM-HMM search results for kidney-related zinc finger transcription factors.** Orthogroup ID, corresponding human gene name (UniProt ID), and orthogroup composition is shown for two bilaterian-specific zinc finger transcription factors related to kidney/nephron development. Columns 4–7 summarise results of HMM-HMM searches in our database. In column four and five, orthogroup ID and composition of the four best search hits for each query HMM are shown. Columns six and seven report their last common ancestor and corresponding E-value. B = Bilateria; Cn = Cnidaria; Ct = Ctenophora; F = Fungi; Pl = Placozoa; Po = Porifera. Note that each query HMM detects itself as best hit. In both cases, composition of the next similar orthogroups does not support a (eu)metazoan ancestor on a broad phylogenetic basis as only one or two non-bilaterian species are present in the detected orthogroups. This indicates that the two kidney-related factors originated in the bilaterian ancestor.

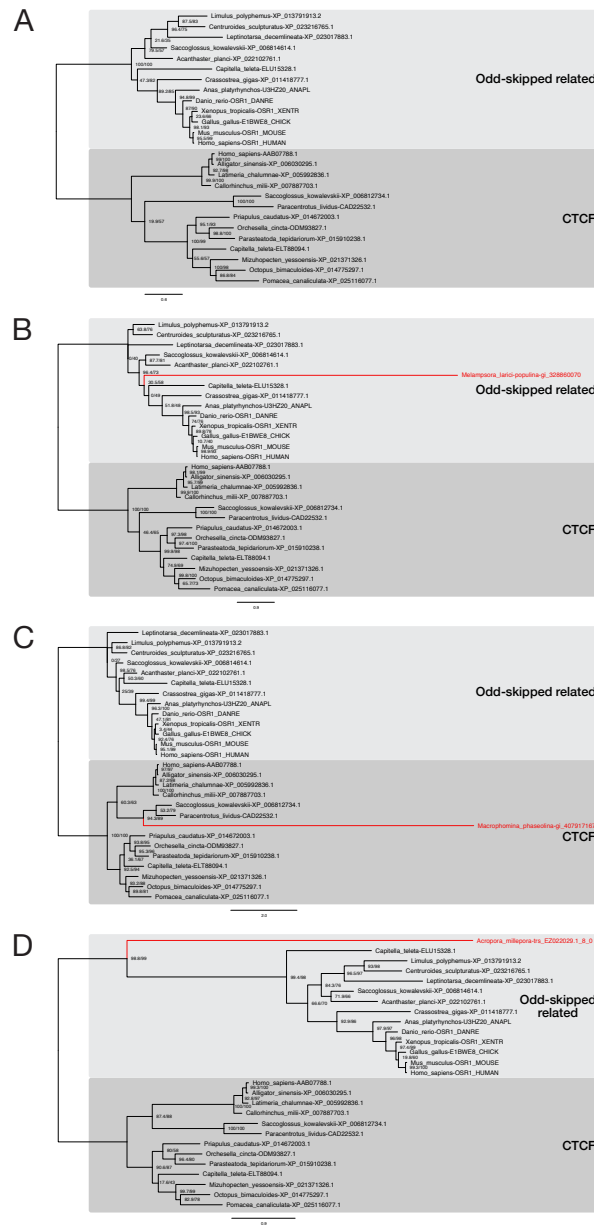

**Supplementary Figure 1: Bilaterian-wide distribution of the Odd-skipped-related transcription factor.** Multiple sequence alignments, underlying the four maximum likelihood phylogenetic reconstructions A–D, consist of 26 representative Odd-skipped related and CTCF sequences from various bilaterians, downloaded from NCBI. The alignments consist of 909–1094 distinct alignment patterns with a proportion of gaps and completely undetermined characters between 45.98 % and 52.38 %. In each subfigure B–D, one of three sequences (highlighted in red) from fungi or cnidarians was added that were present in the original orthogroup OG\_5226 and shifted its ancestor to opisthokonts. The added sequences either reduce bootstrap support of the OSR clade (B) or clustered with the outgroup clade (C and D), suggesting that they do not belong to the OSR orthogroup. Branch labels correspond to the results of SH-aLRT (Shimodaira–Hasegawa-like approximate likelihood ratio test, left) and UFBoot (ultrafast bootstrap approximation, right) as implemented in IQ-TREE [Nguyen et al. 2015].

## Plal1 (OG\_11041)

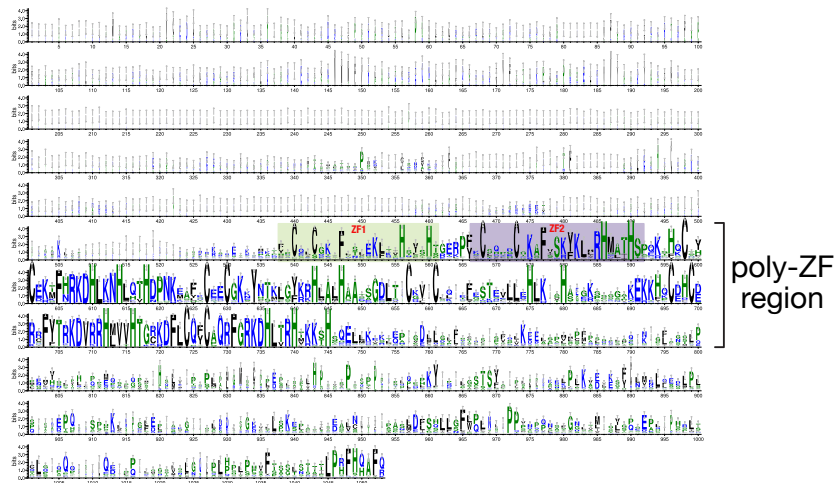

## CTCF (OG\_6452)

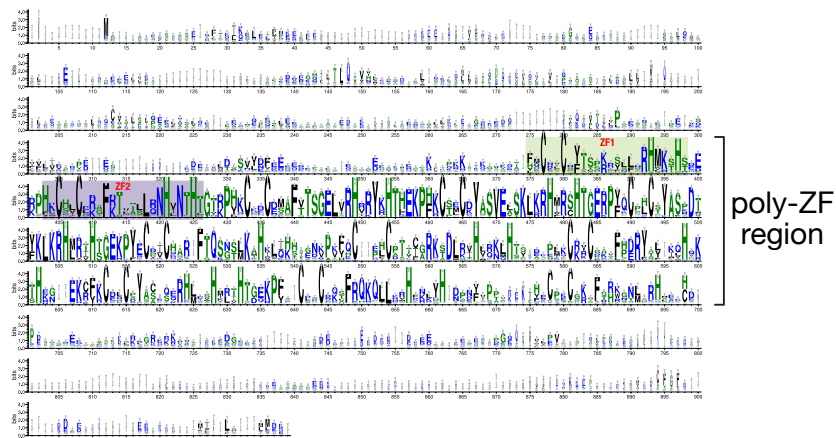

**Supplementary Figure 2: Information content of two bilaterian-specific orthogroups with poly-zinc finger domain.** Sequence logo representations [Crooks et al. 2004] of two bilaterian-specific orthogroups, CTCF (OG\_6452) and Plal1 (OG\_11041), both containing multiple C<sub>2</sub>H<sub>2</sub> Zinc fingers in their central region (see Supplementary Table 8). The Plal1 logo was built from 92 sequences aligned over 1053 positions. The CTCF logo represents 175 sequences and 939 alignment positions, as obtained in the clustering. Indels and unaligned regions have been removed from the corresponding multiple sequence alignments, and the two first zinc finger domains of each protein are highlighted by shading and a red label. The sequence logos demonstrate that the central ZF domains are conserved beyond the Cys and His residues needed for Zn<sup>2+</sup> complexation. Individual Zinc fingers in both proteins display highly informative and unique signatures that distinguish them from other Zinc fingers in the same or similar proteins.

## References

- Cande, J. D., Chopra, V. S., and Levine, M. (2009). Evolving enhancer-promoter interactions within the tinman complex of the flour beetle, *Tribolium castaneum*. *Development*, 136(18):3153–60.
- Crooks, G. E., Hon, G., Chandonia, J.-M., and Brenner, S. E. (2004). Weblogo: a sequence logo generator. *Genome Research*, 14:1188–1190.
- Heger, P., George, R., and Wiehe, T. (2013). Successive gain of insulator proteins in arthropod evolution. *Evolution*, 67(10):2945–2956.
- Li, L., Stoeckert, Jr, C. J., and Roos, D. S. (2003). OrthoMCL: identification of ortholog groups for eukaryotic genomes. *Genome Research*, 13(9):2178–89.
- Matus, D. Q., Thomsen, G. H., and Martindale, M. Q. (2007). FGF signaling in gastrulation and neural development in *Nematostella vectensis*, an anthozoan cnidarian. *Dev Genes Evol*, 217:137–148.
- Nguyen, L.-T., Schmidt, H. A., von Haeseler, A., and Minh, B. Q. (2015). IQ-TREE: a fast and effective stochastic algorithm for estimating maximum-likelihood phylogenies. *Molecular Biology and Evolution*, 32:268–274.
- Petryszak, R., Keays, M., Tang, Y. A., Fonseca, N. A., Barrera, E., Burdett, T., Füllgrabe, A., Fuentes, A. M.-P., Jupp, S., Koskinen, S., Mannion, O., Huerta, L., Megy, K., Snow, C., Williams, E., Barzine, M., Hastings, E., Weisser, H., Wright, J., Jaiswal, P., Huber, W., Choudhary, J., Parkinson, H. E., and Brazma, A. (2016). Expression atlas update—an integrated database of gene and protein expression in humans, animals and plants. *Nucleic Acids Res*, 44:D746–D752.
- Sebé-Pedrós, A., Ariza-Cosano, A., Weirauch, M. T., Leininger, S., Yang, A., Torruella, G., Adamski, M., Adamska, M., Hughes, T. R., Gómez-Skarmeta, J. L., and Ruiz-Trillo, I. (2013). Early evolution of the T-box transcription factor family. *Proc Natl Acad Sci U S A*, 110:16050–16055.
- Tomancak, P., Beaton, A., Weiszmam, R., Kwan, E., Shu, S., Lewis, S. E., Richards, S., Ashburner, M., Hartenstein, V., Celniker, S. E., and Rubin, G. M. (2002). Systematic determination of patterns of gene expression during *Drosophila* embryogenesis. *Genome Biol*, 3:RESEARCH0088.
- Watanabe, H., Schmidt, H. A., Kuhn, A., Höger, S. K., Kocagöz, Y., Laumann-Lipp, N., Ozbek, S., and Holstein, T. W. (2014). Nodal signalling determines biradial asymmetry in *Hydra*. *Nature*, 515(7525):112–115.
