# Supplementary material for: The genetic factors of bilaterian evolution
Source: eLife journal article supplement (doi:10.7554/elife.45530), 2020-07-16

# OG\_28197

6500|gi\_524911331  
6523|trs\_gi\_399778750\_dbj\_FX198216.1\_4\_0  
6579|trs\_gi\_630132519\_gb\_GAOX01016061.1\_1\_0  
225164|gi\_556094920  
256108|trs\_comp47765\_c0\_seq1\_15\_0  
256108|trs\_comp45691\_c0\_seq1\_5\_0  
259844|trs\_comp203490\_c0\_seq1\_3\_0  
283909|gi\_443709643  
937758|trs\_comp25775\_c0\_seq1\_5\_0  
7897|gi\_556977833  
7918|gi\_573879105  
7955|gi\_190339019  
8083|gi\_551505347  
8090|gi\_432890274  
8478|gi\_530579811  
8665|gi\_565301083  
9606|orf\_chr19\_451364\_0  
9785|gi\_344269379  
9796|gi\_545176896  
10029|gi\_354503392  
10181|gi\_512828138  
10181|gi\_351697946  
10181|gi\_513011471  
10224|gi\_291230534  
13616|gi\_126329546  
13735|gi\_558146486  
31033|gi\_410910008  
34839|gi\_533202831  
38654|gi\_557318846  
63121|trs\_comp5143\_c0\_seq2\_8\_0  
63121|trs\_comp8816\_c0\_seq1\_16\_0  
106582|gi\_498950955  
246437|gi\_444730781  
419612|gi\_560929018

L

D

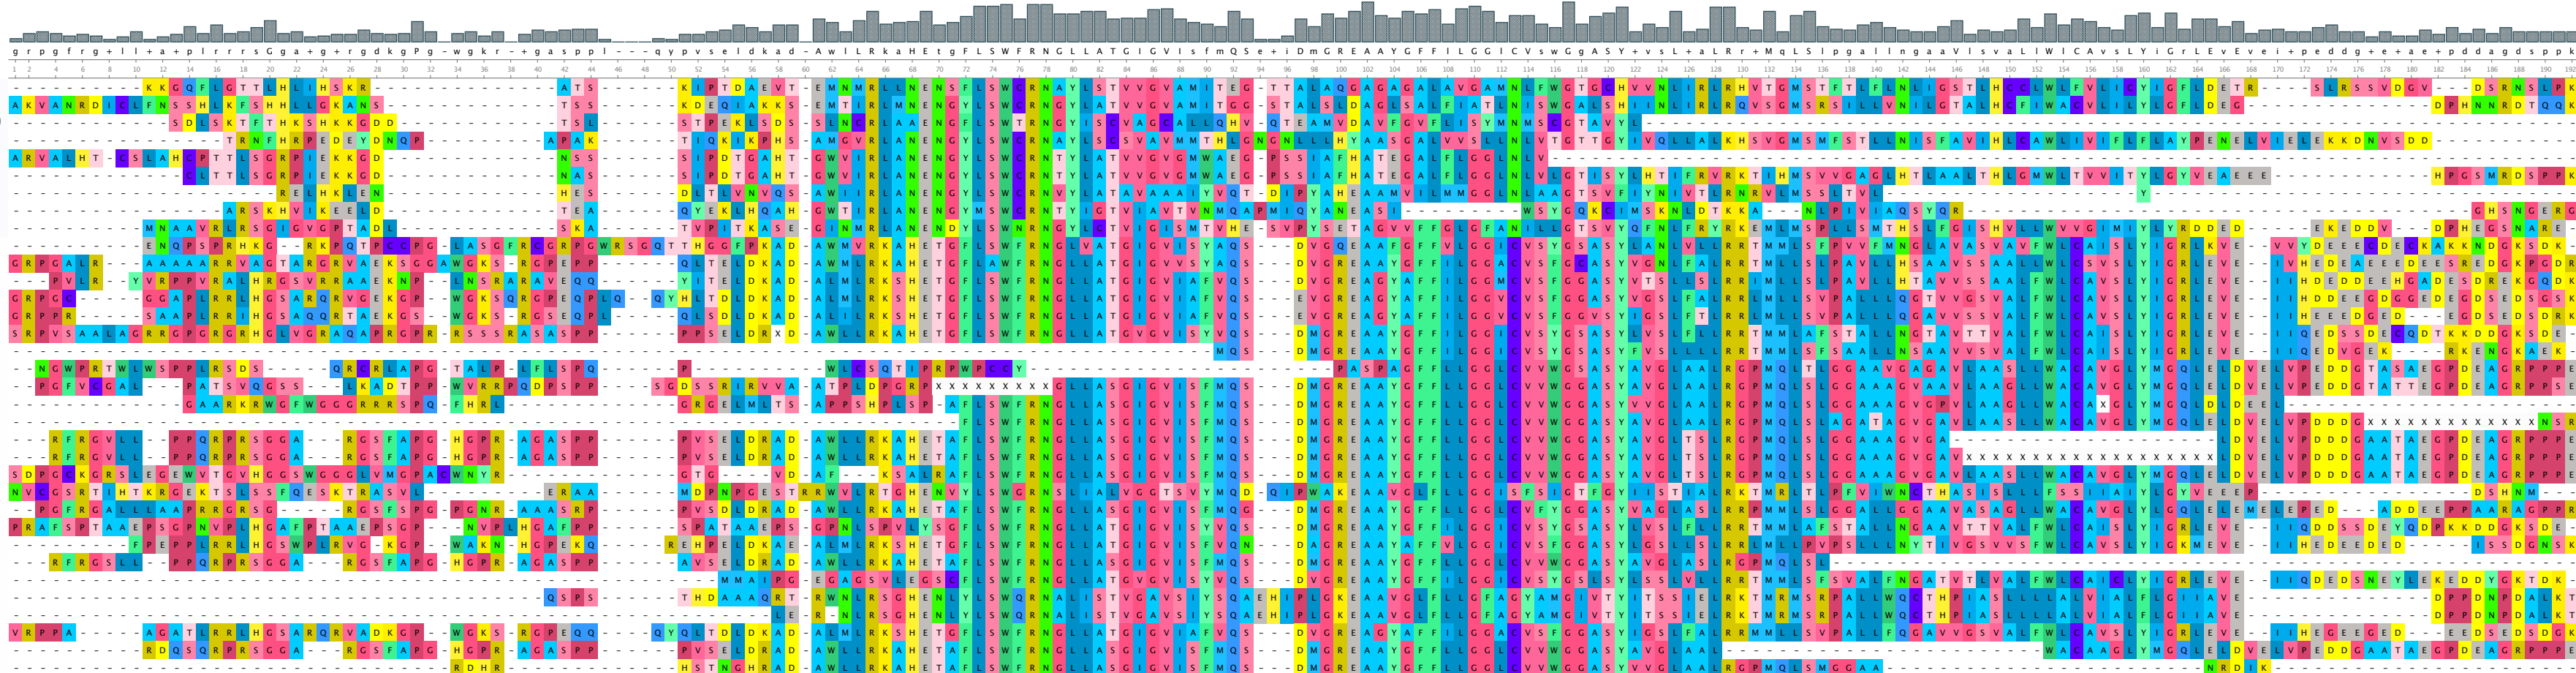

# OG\_33174

6412|gi\_555705341  
6500|gi\_524887449  
6523|trs\_gi\_399774768\_dbj\_FX21608.1\_1\_0  
452200|trs\_comp133168\_c1\_seq27\_12\_0  
7668|gi\_390340351  
7668|orf\_AAGJ04052379.1\_438\_0  
7739|gi\_29287031  
7868|predict\_SINCAMP00000017045\_0  
7897|gi\_556952956  
7955|gi\_292626789  
8083|gi\_551500480  
8128|gi\_348502904  
8469|gi\_465970342  
8478|gi\_530656235  
8665|gi\_565313681  
9258|gi\_345311153  
9371|gi\_507653401  
9669|gi\_511999555  
9978|gi\_504161564  
10090|gi\_148690596  
10116|gi\_149043441  
10224|orf\_ACQM01060567.1\_237\_0  
38654|gi\_557284668  
46514|trs\_comp83247\_c0\_seq2\_38\_0  
99883|gi\_47229283  
109478|gi\_521023889  
137513|trs\_comp21618\_c0\_seq2\_32\_0  
246437|gi\_444729092  
419612|gi\_528765629

D

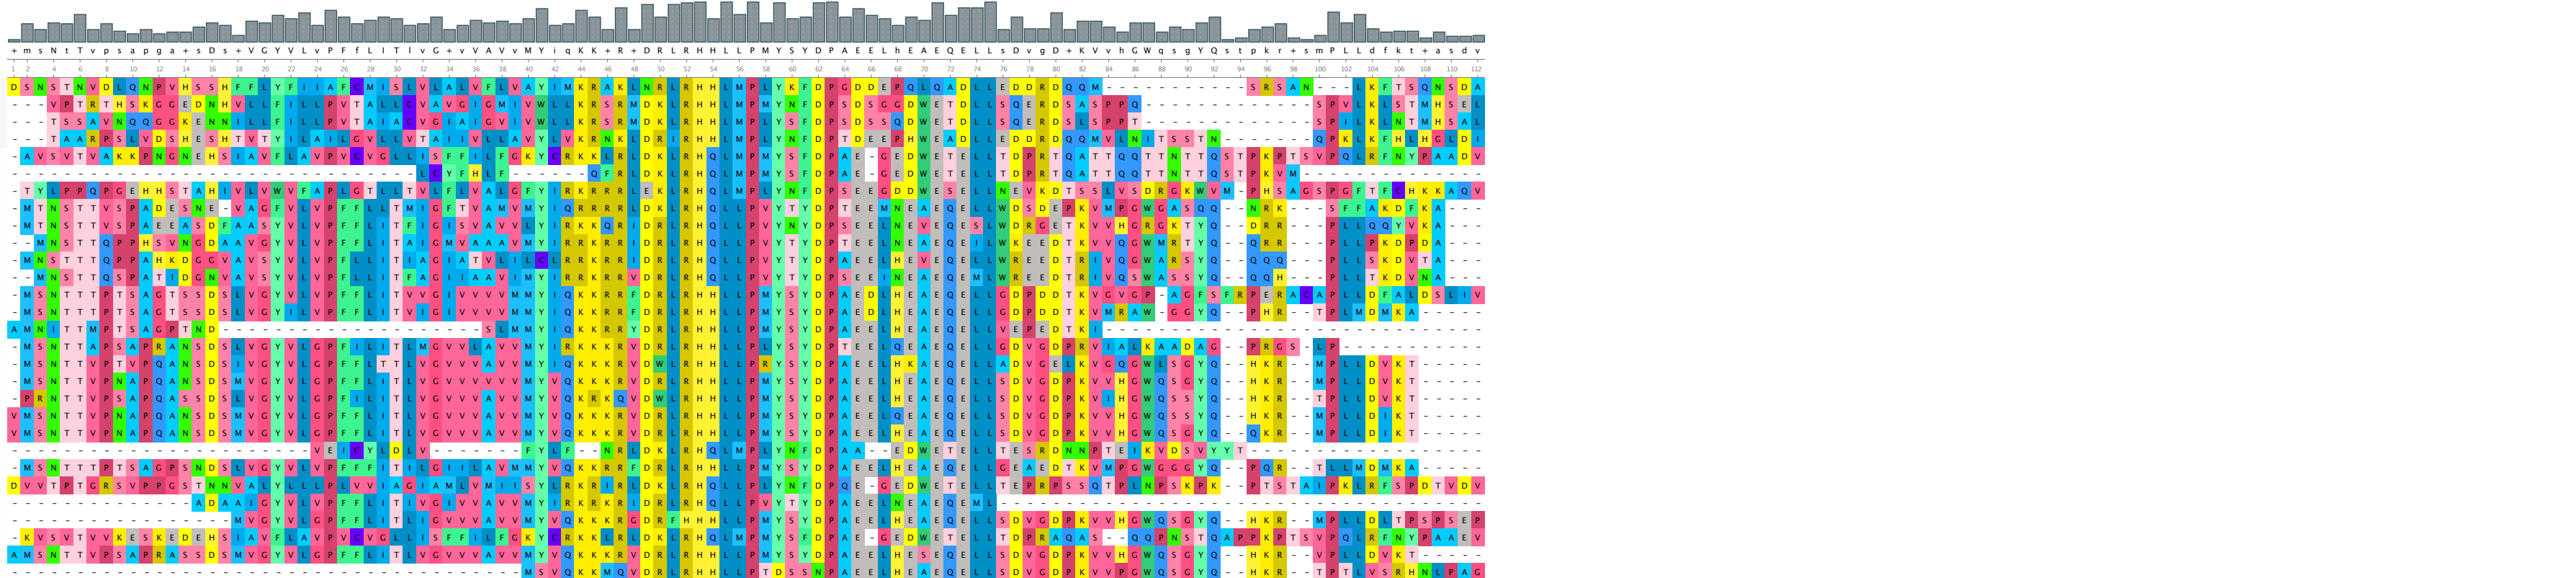

Supplement: supp [file elife_poa_e45530_Figure_2_figure_supplement_2.pdf › elife_poa_e45530_Figure_2_figure_supplement_2.pdf]
