# Supplementary material for: The genetic factors of bilaterian evolution
Source: eLife journal article supplement (doi:10.7554/elife.45530), 2020-07-16
Supplement: supp [file elife_poa_e45530_Figure_5_figure_supplement_1.pdf › elife_poa_e45530_Figure_5_figure_supplement_1.pdf]

**A**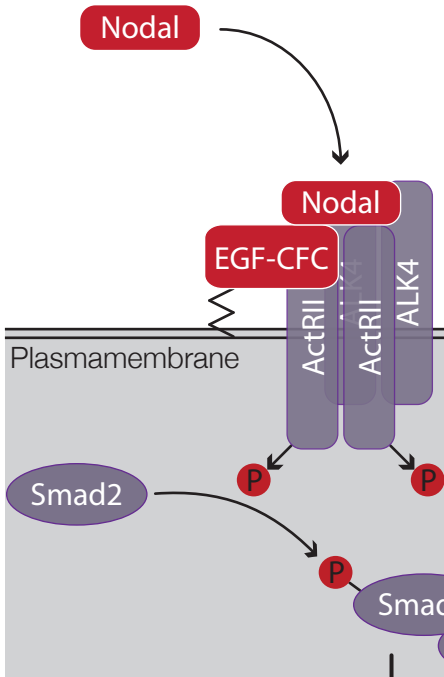**B**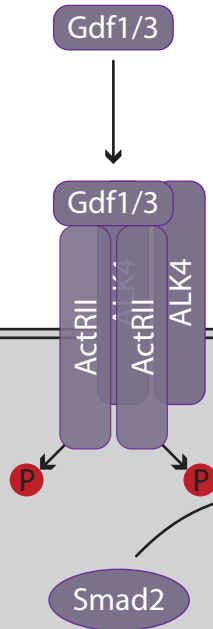**C**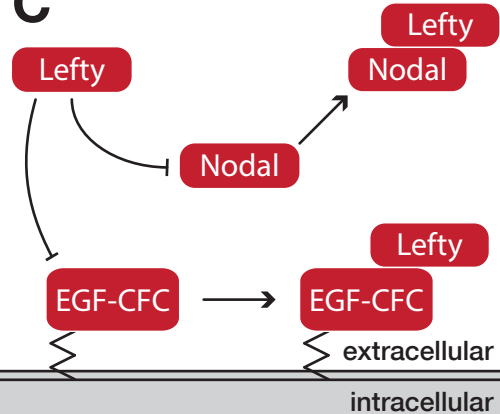

Plasmamembrane

extracellular  
intracellular

Nucleus

pre-bilaterian origin  
bilaterian origin

Smad2

Smad4

FoxH1

Nodal-dependent transcription

Smad2

Smad4

Nodal-independent transcription
