# Supplementary material for: The genetic factors of bilaterian evolution
Source: eLife. 2020 Jul 16;9:e45530. doi: 10.7554/eLife.45530 (PMC7535936; doi:10.7554/eLife.45530)
Supplement: Supplementary file 2. [file elife-45530-supp2.xls]

## Sheet: bigwen_table_transcriptome_download
Species	Phylum, Superphylum	Accession	Download Link
Acropora cervicornis	Cnidaria, non-Bilateria	---	https://www.ncbi.nlm.nih.gov/nuccore?LinkName=biosample_nuccore&from_uid=2376557
Acropora millepora	Cnidaria, non-Bilateria	---	https://www.ncbi.nlm.nih.gov/nuccore/?term=%22Acropora+millepora%22%5BOrganism%5D
Aiptasia pallida	Cnidaria, non-Bilateria	SRX202151	https://www.ncbi.nlm.nih.gov/sra/?term=SRX202151 and SRX231866
Anemonia viridis	Cnidaria, non-Bilateria	LIBEST_023433	https://www.ncbi.nlm.nih.gov/nucest/?term=LIBEST_023433
Aphrocallistes vastus	Porifera, non-Bilateria	SRX404392, SRX011009	https://www.ncbi.nlm.nih.gov/sra/SRX404392[accn]
Aplysia californica	Mollusca, Lophotrochozoa	---	https://www.ncbi.nlm.nih.gov/nuccore/?term=GBDA01
Apostichopus japonicus	Echinodermata, Deuterostomia	SRX122622	https://www.ncbi.nlm.nih.gov/sra/?term=SRX122622
Beroe sp.	Ctenophora, non-Bilateria	ERR216194	https://trace.ncbi.nlm.nih.gov/Traces/sra/?run=ERR216194
Beroe abyssicola	Ctenophora, non-Bilateria	---	https://neurobase.rc.ufl.edu/pleurobrachia/download
Bolinopsis infundibulum	Ctenophora, non-Bilateria	---	https://neurobase.rc.ufl.edu/pleurobrachia/download
Bolocera tuediae	Cnidaria, non-Bilateria	SRX130170	https://www.ncbi.nlm.nih.gov/sra/?term=SRX130170
Botryllus schlosseri	Tunicata, Deuterostomia	LIBEST_027030	https://www.ncbi.nlm.nih.gov/biosample/?term=LIBEST_027030
Brachionus calyciflorus	Rotifera, Lophotrochozoa	SRR611720	https://trace.ncbi.nlm.nih.gov/Traces/sra/?run=SRR611718, SRR611719, SRR611720
Brugia malayi	Nematoda, Ecdysozoa	---	ftp://wormbase.org/pub/wormbase/species/b_malayi/sequence/protein/
Bugula neritina	Bryozoa, Lophotrochozoa	SRR034781	https://trace.ncbi.nlm.nih.gov/Traces/sra/?run=SRR034781
Cephalothrix hongkongiensis	Nemertea, Lophotrochozoa	SRR618505	https://trace.ncbi.nlm.nih.gov/Traces/sra/?run=SRR618505
Chiton olivaceus	Mollusca, Lophotrochozoa	SRR618506	https://trace.ncbi.nlm.nih.gov/Traces/sra/?run=SRR618506
Coeloplana astericola	Ctenophora, non-Bilateria	---	https://neurobase.rc.ufl.edu/pleurobrachia/download
Coenagrion puella	Arthropoda, Ecdysozoa	SRX371959	https://www.ncbi.nlm.nih.gov/sra/?term=SRX371959
Crella elegans	Porifera, non-Bilateria	SRX217043	https://www.ncbi.nlm.nih.gov/sra/?term=SRX217043, SRX216926
Dryodora gladiformis	Ctenophora, non-Bilateria	---	https://neurobase.rc.ufl.edu/pleurobrachia/download
Enchytraeus crypticus	Annelida, Lophotrochozoa	---	https://www.ncbi.nlm.nih.gov/nuccore/?term=GALF01
Euplokamis dunlapae	Ctenophora, non-Bilateria	---	https://neurobase.rc.ufl.edu/pleurobrachia/download
Eupolybothrus cavernicolus	Arthropoda, Ecdysozoa	ERR338470	https://trace.ncbi.nlm.nih.gov/Traces/sra/?run=ERR338470
Evechinus chloroticus	Echinodermata, Deuterostomia	SRR1014618	https://trace.ncbi.nlm.nih.gov/Traces/sra/?run=SRR1014618, SRR1014619
Folsomia candida	Arthropoda, Ecdysozoa	SRX321913	https://www.ncbi.nlm.nih.gov/sra/SRX321913[accn]
Flustra foliacea	Bryozoa, Lophotrochozoa	---	https://www.ncbi.nlm.nih.gov/nucest/?term=txid478208[Organism:noexp]
Gorgonia ventalina	Cnidaria, non-Bilateria	SRX177805, SRX177804	https://www.ncbi.nlm.nih.gov/sra/?term=SRX177805, SRX177804
Halocynthia roretzi	Tunicata, Deuterostomia	---	https://www.ncbi.nlm.nih.gov/nucest/?term=txid7729[Organism:noexp]
Hermodice carunculata	Annelida, Lophotrochozoa	SRR651044	https://trace.ncbi.nlm.nih.gov/Traces/sra/?run=SRR651044
Holothuria glaberrima	Echinodermata, Deuterostomia	---	https://www.ncbi.nlm.nih.gov/sra?term=SRP012442
Hormathia digitata	Cnidaria, non-Bilateria	SRR504348	https://www.ncbi.nlm.nih.gov/sra/?term=SRR504348
Hormogaster elisae	Annelida, Lophotrochozoa	SRR786597	https://trace.ncbi.nlm.nih.gov/Traces/sra/?run=SRR786597, SRR786598
Hydractinia symbiolongicarpus	Cnidaria, non-Bilateria	---	https://www.ncbi.nlm.nih.gov/nuccore/GAWH00000000.1
Hypsibius dujardini	Tardigrada, Ecdysozoa	---	https://zenodo.org/record/45162/files/nHd.2.3.1.aug.proteins.fasta.gz?download=1
Lepeophtheirus salmonis	Arthropoda, Ecdysozoa	---	https://www.ncbi.nlm.nih.gov/nuccore?term=73429%5BBioProject%5D
Limulus polyphemus	Arthropoda, Ecdysozoa	SRR610305	https://www.ncbi.nlm.nih.gov/sra/?term=SRR610305, SRR064415
Lingula anatina	Brachiopoda, Lophotrochozoa	SRR330440	https://trace.ncbi.nlm.nih.gov/Traces/sra/?run=SRR330440
Litopenaeus vannamei	Arthropoda, Ecdysozoa	---	https://www.ncbi.nlm.nih.gov/nuccore?term=73443%5BBioProject%5D
Lymnaea stagnalis	Mollusca, Lophotrochozoa	---	https://www.ncbi.nlm.nih.gov/nuccore?term=172067%5BBioProject%5D
Megaselia abdita	Arthropoda, Ecdysozoa	ERX168854	https://www.ncbi.nlm.nih.gov/sra/ERX168854[accn], ERX170856
Metasiro americanus	Arthropoda, Ecdysozoa	SRR618563	https://trace.ncbi.nlm.nih.gov/Traces/sra/?run=SRR618563
Metridium senile	Cnidaria, non-Bilateria	---	https://www.ncbi.nlm.nih.gov/nucest/?term=txid6116[Organism:noexp]
Milnesium tardigradum	Tardigrada, Ecdysozoa	---	https://www.ncbi.nlm.nih.gov/nuccore?term=34121%5BBioProject%5D
Mnemiopsis leidyi	Ctenophora, non-Bilateria	LIBEST_022347	https://www.ncbi.nlm.nih.gov/nucest/?term=LIBEST_022347, LIBEST_014587
Mnemiopsis leidyi	Ctenophora, non-Bilateria	---	https://research.nhgri.nih.gov/mnemiopsis/download/proteome/ML2.2.aa.gz
Montastraea faveolata	Cnidaria, non-Bilateria	---	https://www.ncbi.nlm.nih.gov/nucest/?term=txid48498[Organism:noexp]
Myxobolus cerebralis	Cnidaria, non-Bilateria	SRR628302	https://trace.ncbi.nlm.nih.gov/Traces/sra/?run=SRR628302
Nanomia bijuga	Cnidaria, non-Bilateria	?	?
Nasoonaria sinensis	Arthropoda, Ecdysozoa	SRR1048661	https://trace.ncbi.nlm.nih.gov/Traces/sra/?run=SRR1048661
Octopus vulgaris	Mollusca, Lophotrochozoa	---	https://www.ncbi.nlm.nih.gov/nuccore?term=79361%5BBioProject%5D
Oscarella carmela	Porifera, non-Bilateria	SRX386257	https://www.ncbi.nlm.nih.gov/sra/?term=SRX386257
Patiria miniata	Echinodermata, Deuterostomia	---	https://www.ncbi.nlm.nih.gov/nuccore?term=52335%5BBioProject%5D
Pecten maximus	Mollusca, Lophotrochozoa	---	https://www.ncbi.nlm.nih.gov/nuccore?term=222492%5BBioProject%5D
Peripatopsis sedgwicki	Onychophora, Ecdysozoa	LIBEST_025669	https://www.ncbi.nlm.nih.gov/nucest?LinkName=biosample_nucest&from_uid=168663
Petrosia ficiformis	Porifera, non-Bilateria	---	https://www.ncbi.nlm.nih.gov/sra/?term=SRX151862, SRX151865
Platynereis dumerilii	Annelida, Lophotrochozoa	---	https://www.ncbi.nlm.nih.gov/nucest?LinkName=biosample_nucest&from_uid=2202336
Pleurobrachia bachei	Ctenophora, non-Bilateria	---	https://neurobase.rc.ufl.edu/pleurobrachia/download
Porites australiensis	Cnidaria, non-Bilateria	---	https://www.ncbi.nlm.nih.gov/nuccore?term=236717%5BBioProject%5D
Ptychodera flava	Hemichordata, Deuterostomia	SRR1029584	https://trace.ncbi.nlm.nih.gov/Traces/sra/?run=SRR1029584
Stylophora pistillata	Cnidaria, non-Bilateria	---	https://www.ncbi.nlm.nih.gov/nuccore?term=234072%5BBioProject%5D
Suberites domuncula	Porifera, non-Bilateria	LIBEST_024198	https://www.ncbi.nlm.nih.gov/nucest?LinkName=biosample_nucest&from_uid=167171
Trichuris suis	Nematoda, Ecdysozoa	---	ftp://wormbase.org/pub/wormbase/species/t_suis/sequence/protein/
Urticina eques	Cnidaria, non-Bilateria	SRR942796	https://trace.ncbi.nlm.nih.gov/Traces/sra/?run=SRR942796
Vallicula multiformis	Ctenophora, non-Bilateria	---	https://neurobase.rc.ufl.edu/pleurobrachia/download
