# Supplementary figures and images for: The genetic factors of bilaterian evolution
Source: eLife journal article supplement (doi:10.7554/elife.45530), 2020-07-16

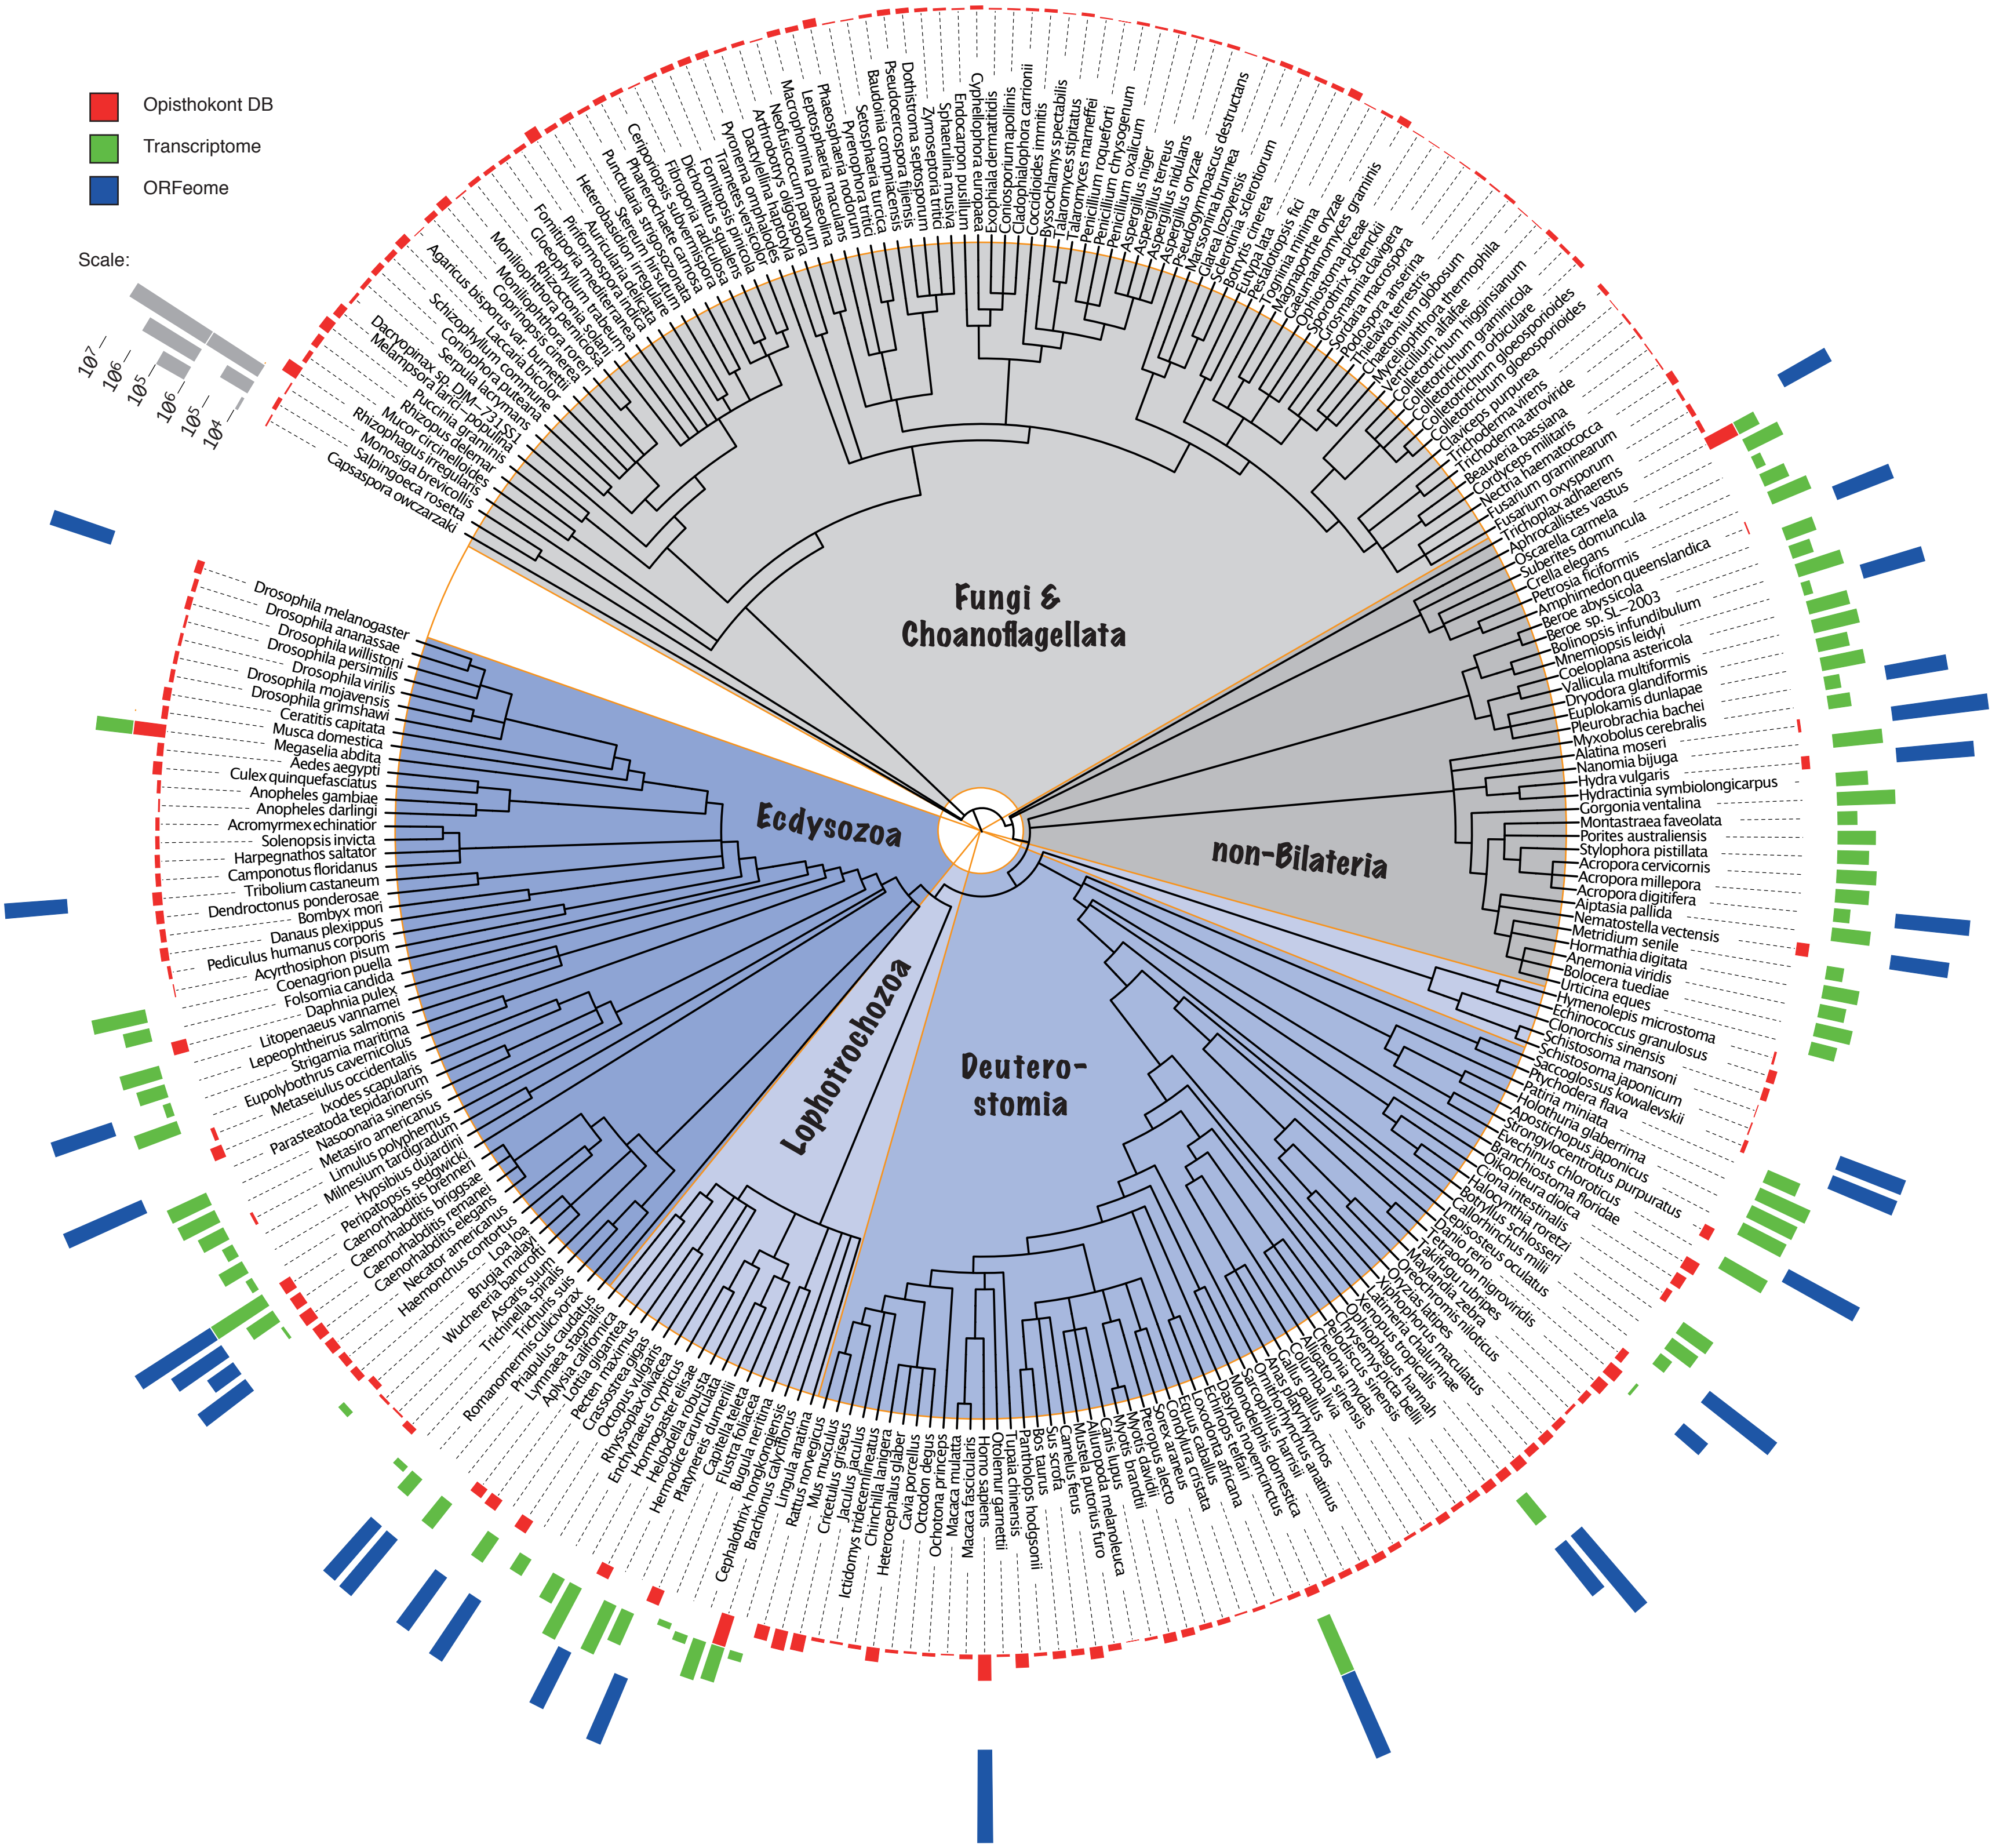

Supplement: supp [file elife_poa_e45530_Figure_1_figure_supplement_1.pdf › elife_poa_e45530_Figure_1_figure_supplement_1.pdf]

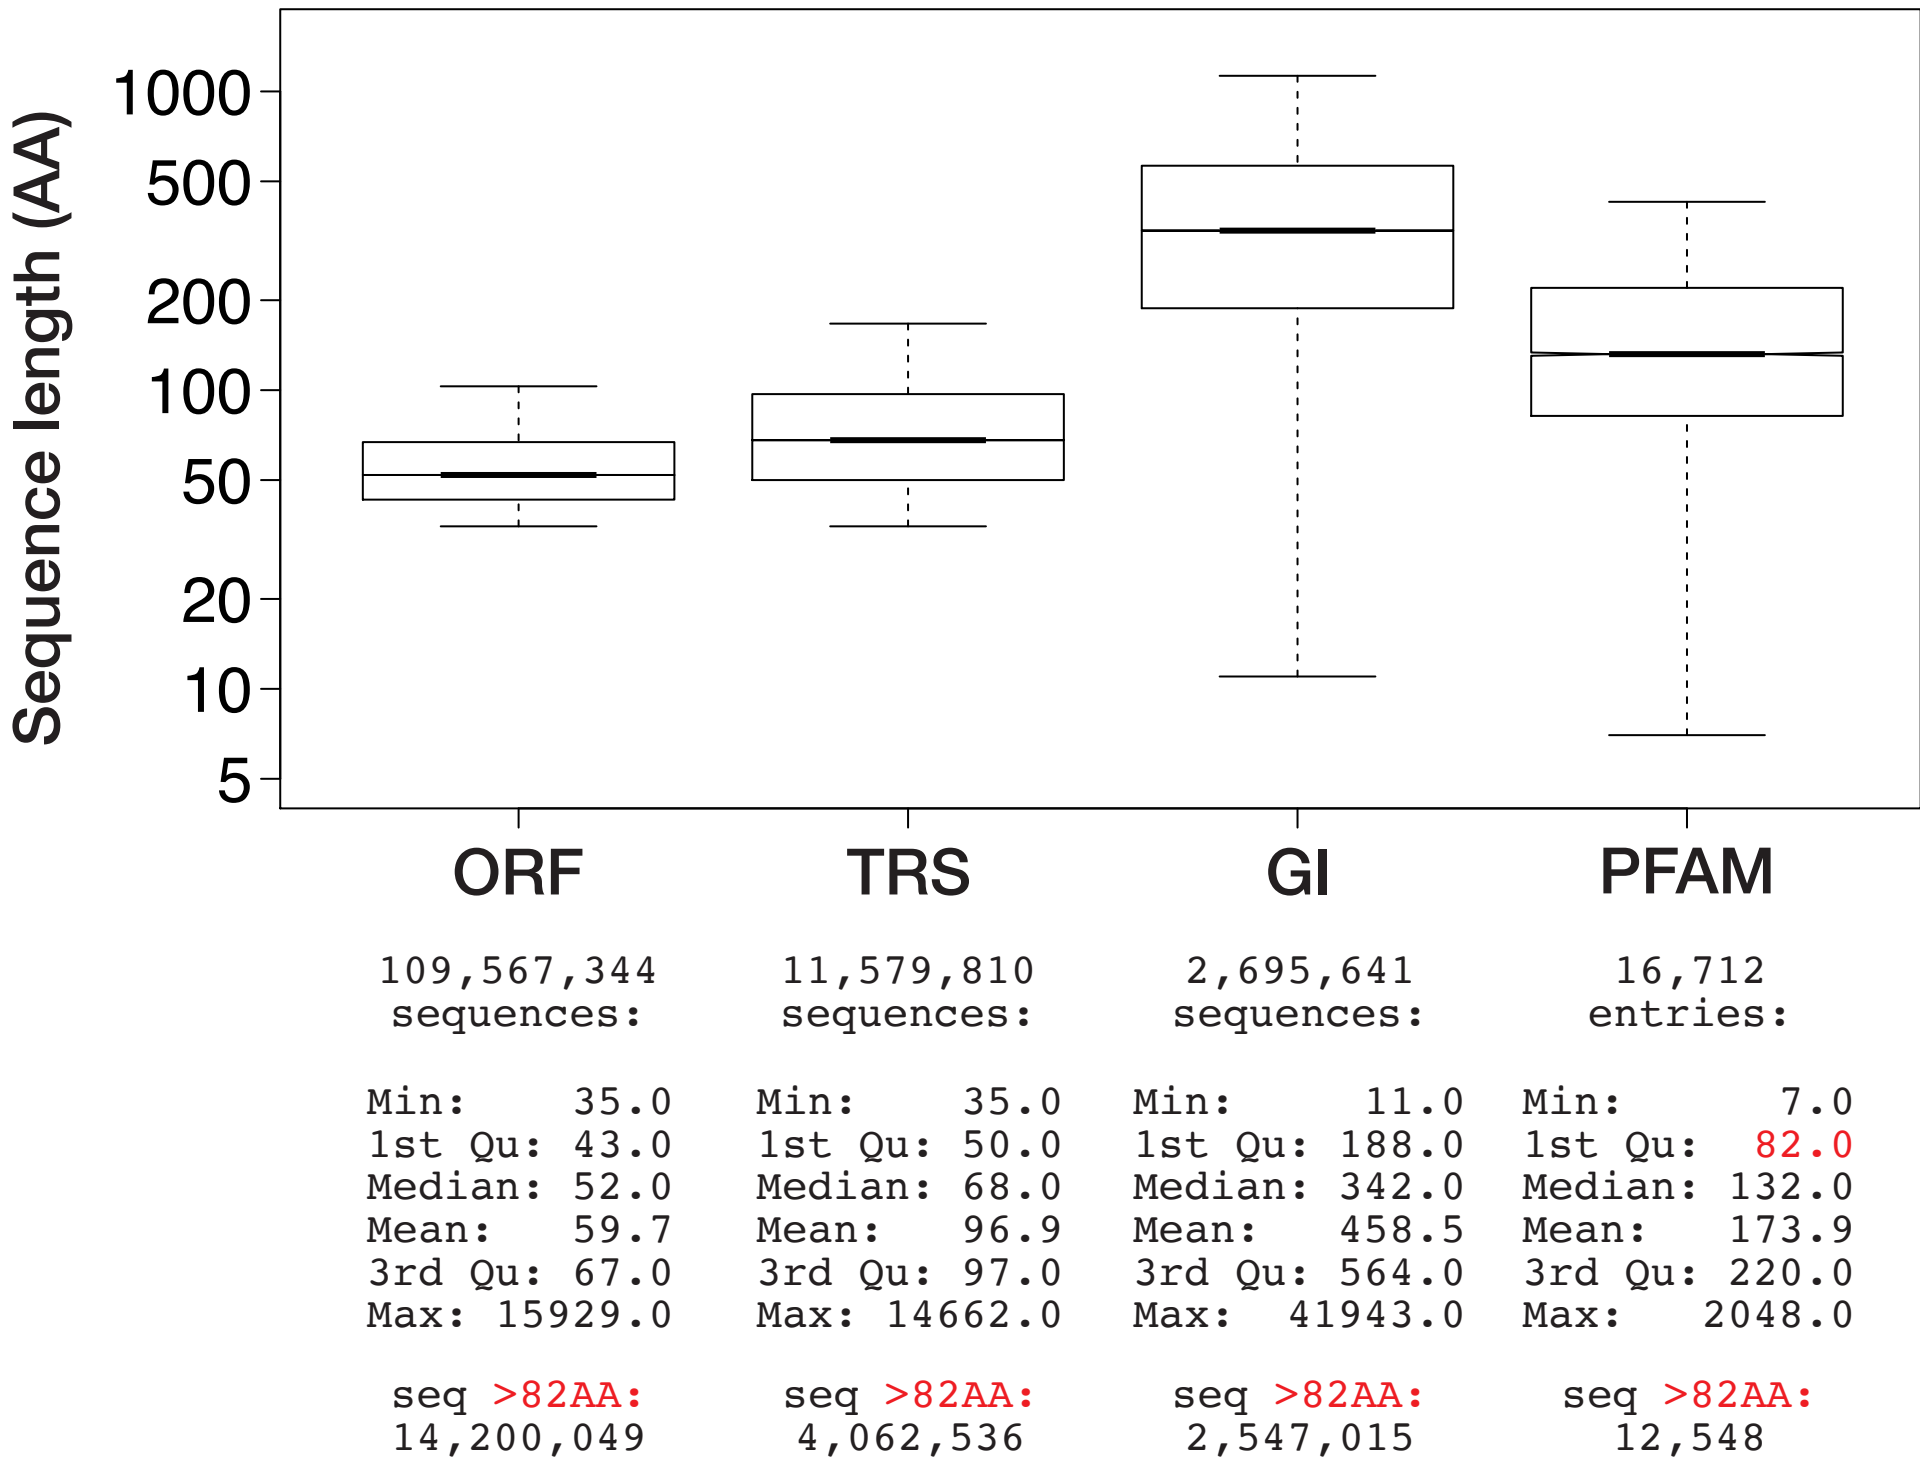

Supplement: supp [file elife_poa_e45530_Figure_1_figure_supplement_2.pdf › elife_poa_e45530_Figure_1_figure_supplement_2.pdf]

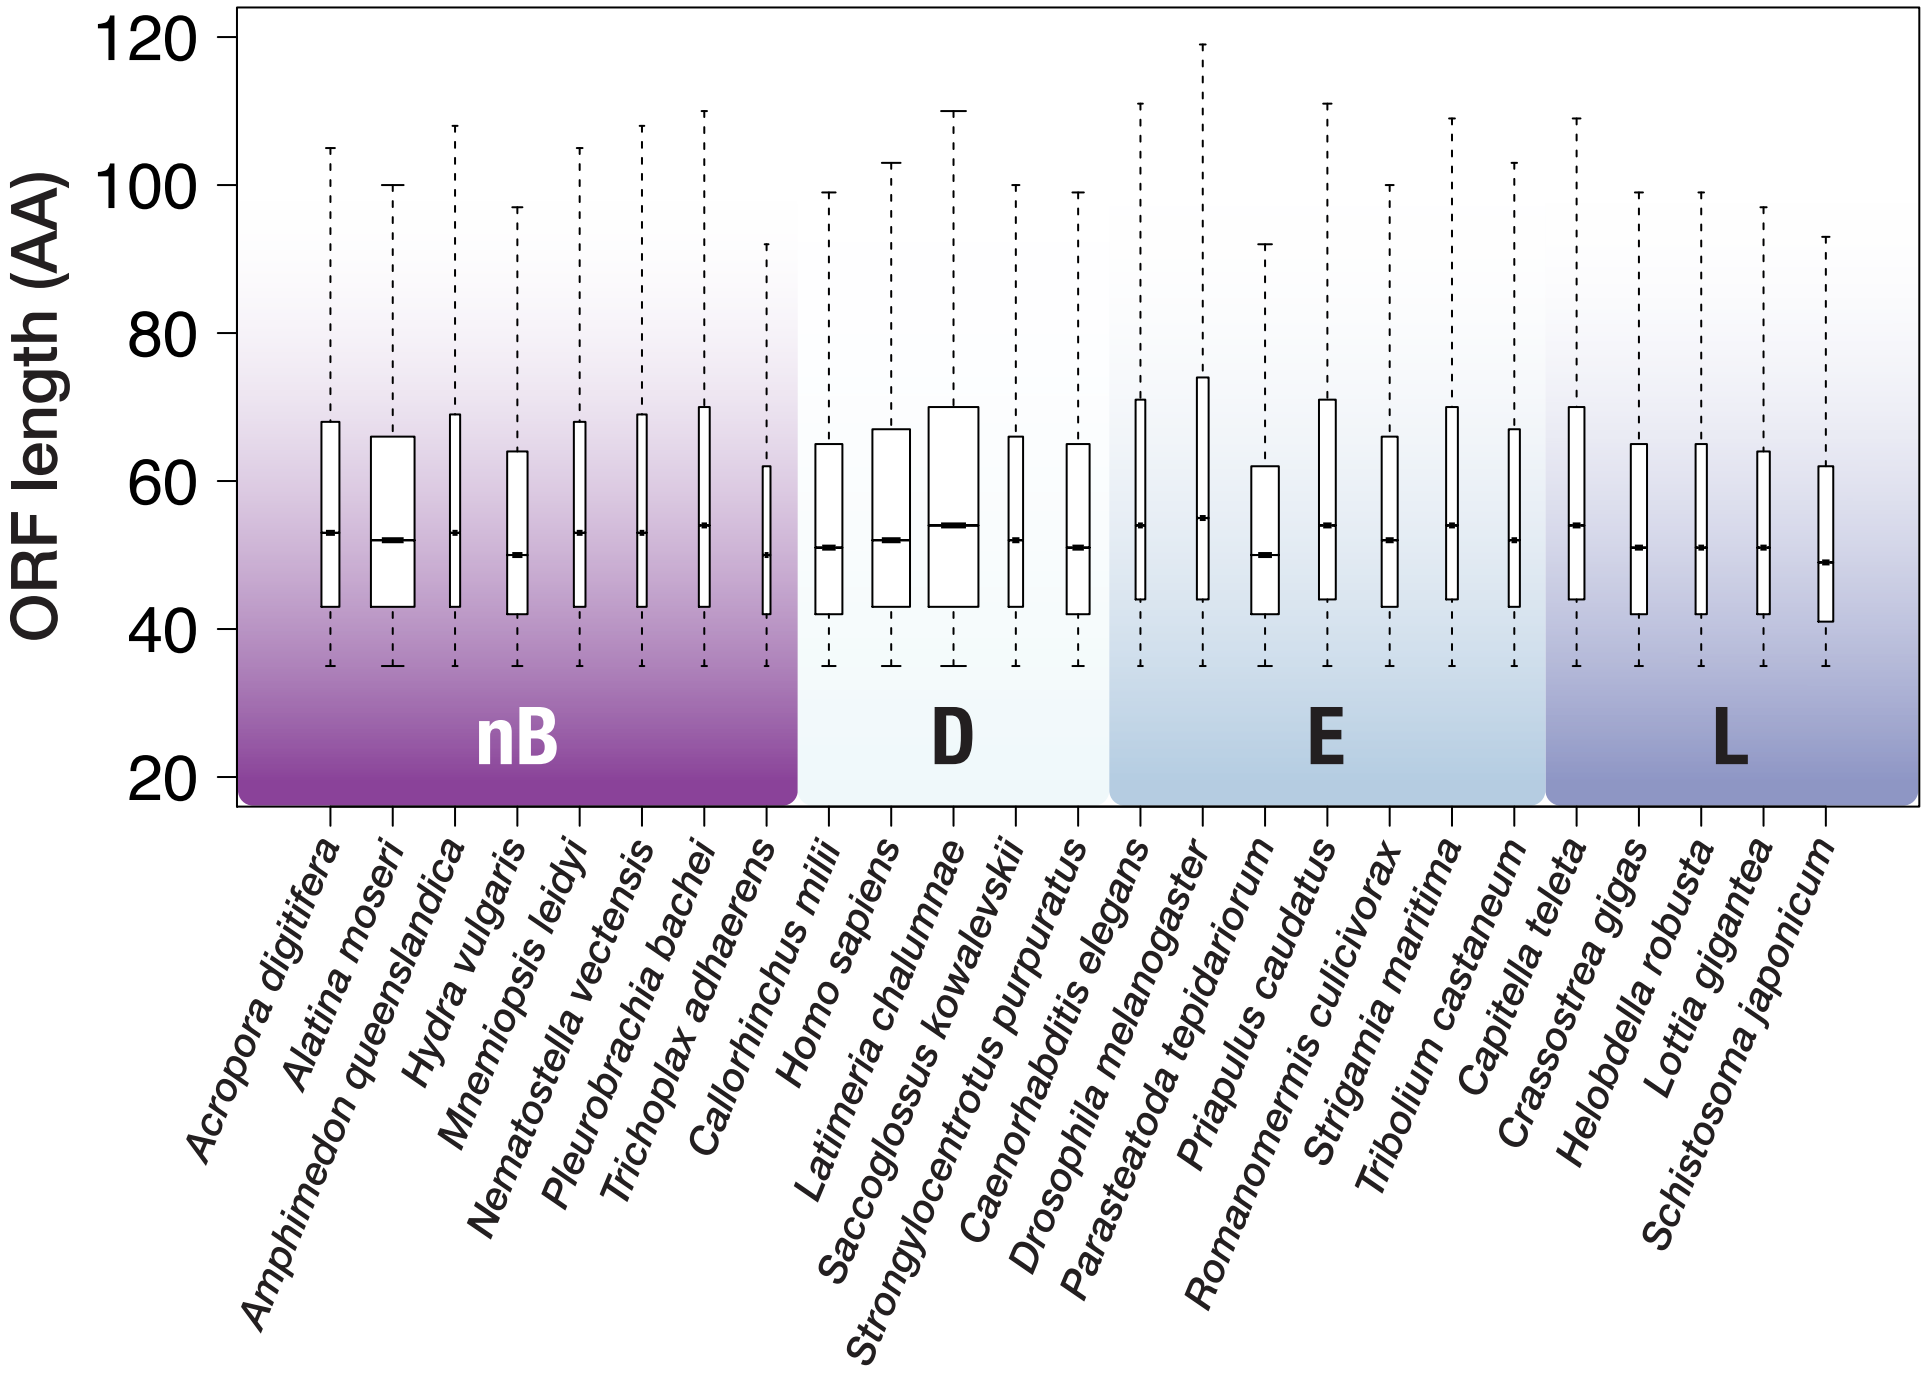

Supplement: supp [file elife_poa_e45530_Figure_1_figure_supplement_3.pdf › elife_poa_e45530_Figure_1_figure_supplement_3.pdf]

A

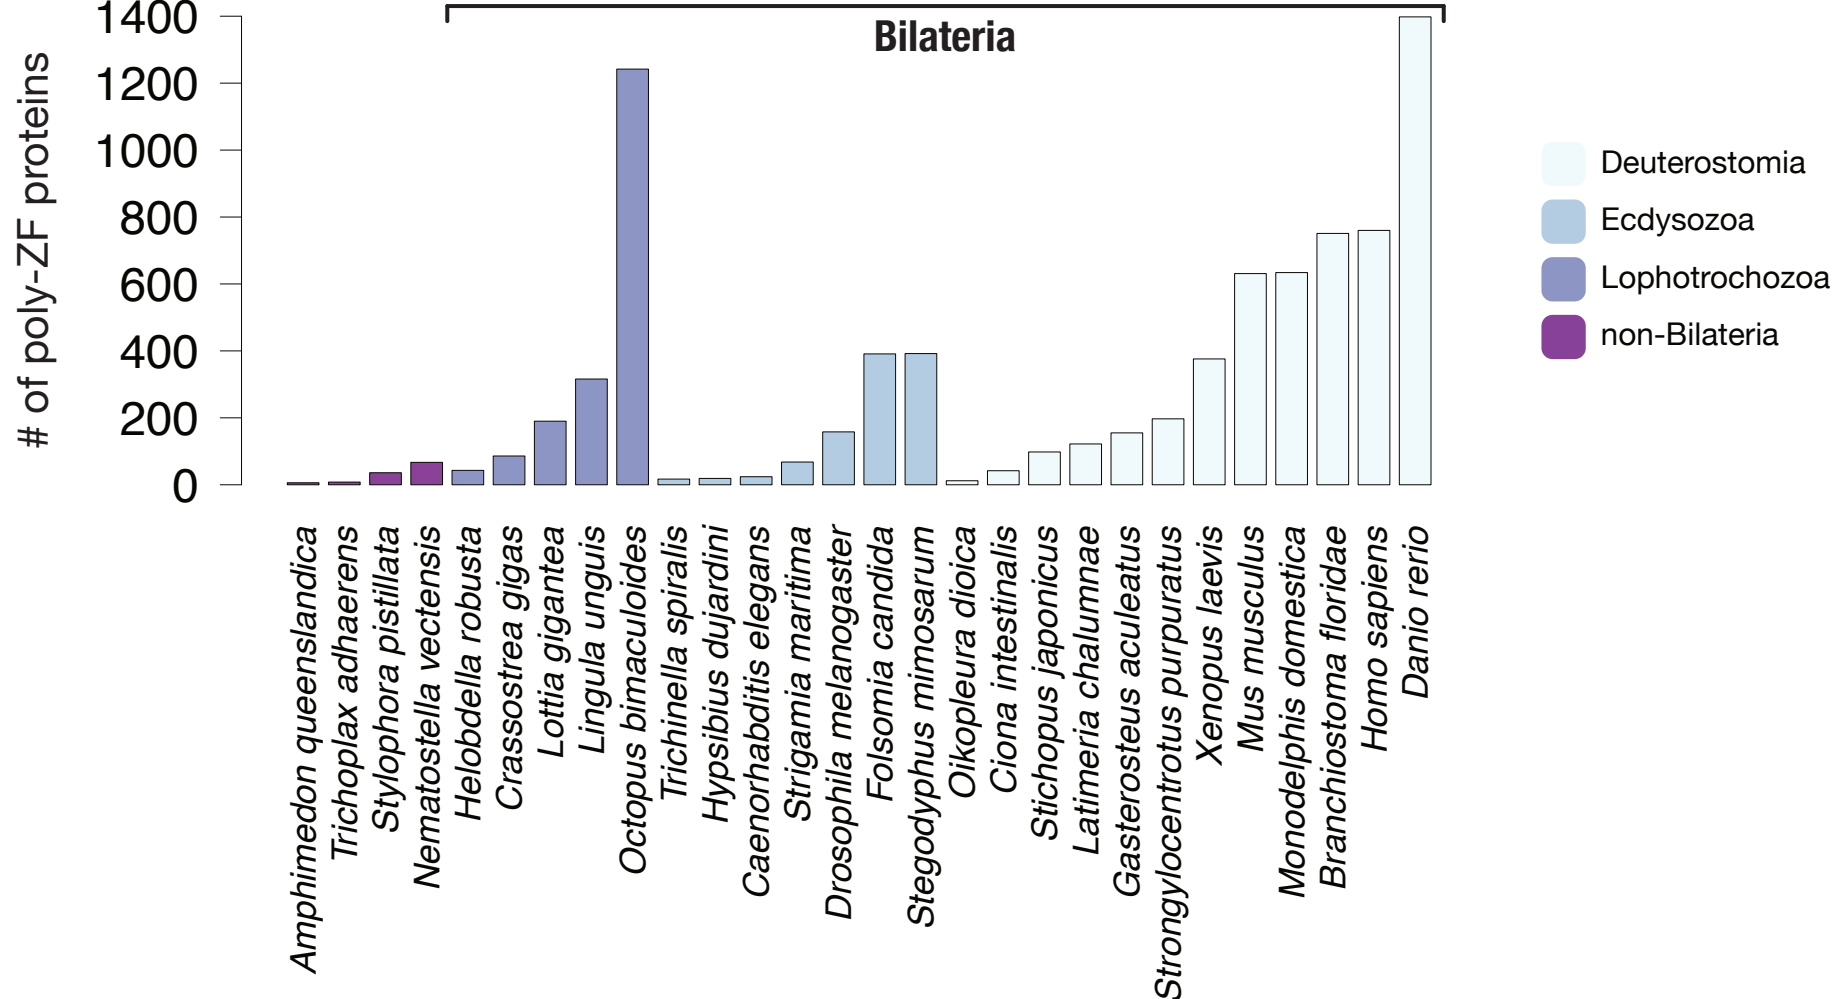

B

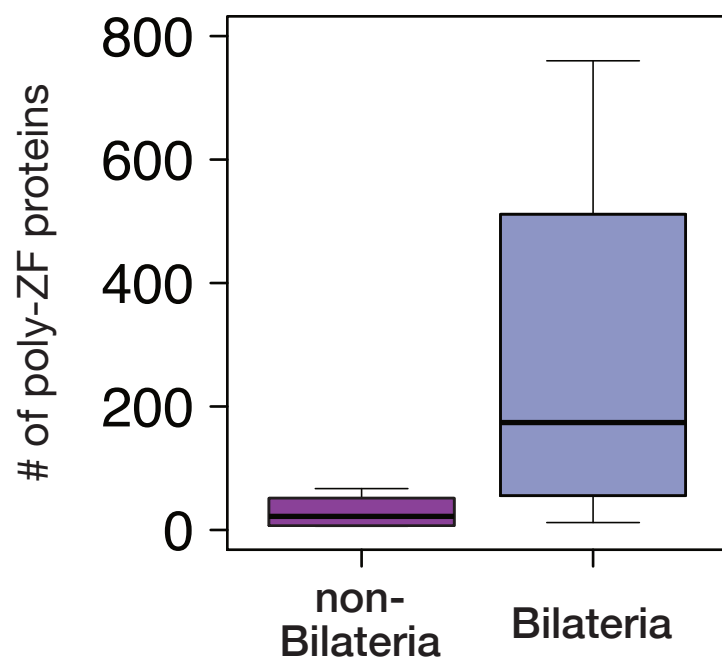

C

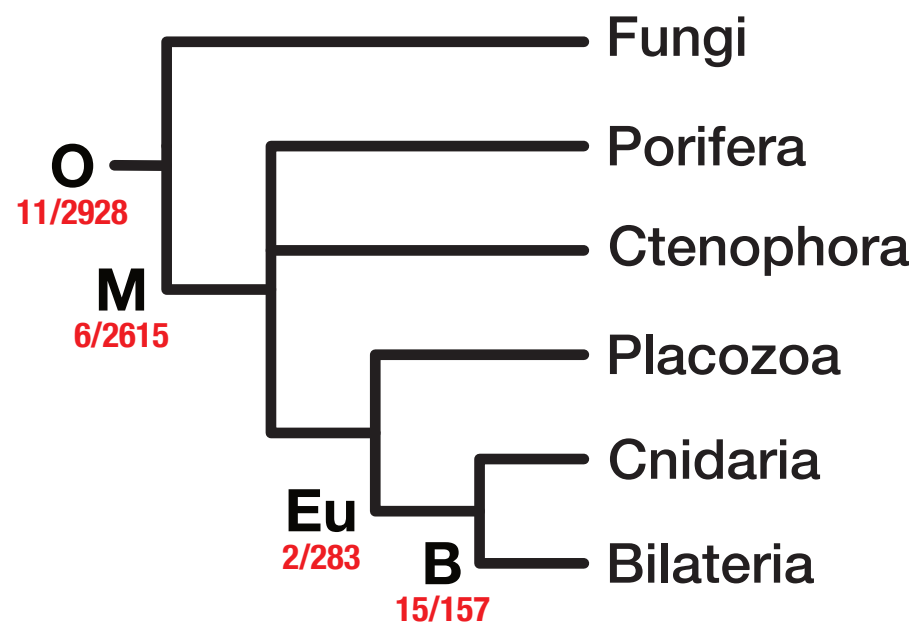

Supplement: supp [file elife_poa_e45530_Figure_2_figure_supplement_1.pdf › elife_poa_e45530_Figure_2_figure_supplement_1.pdf]

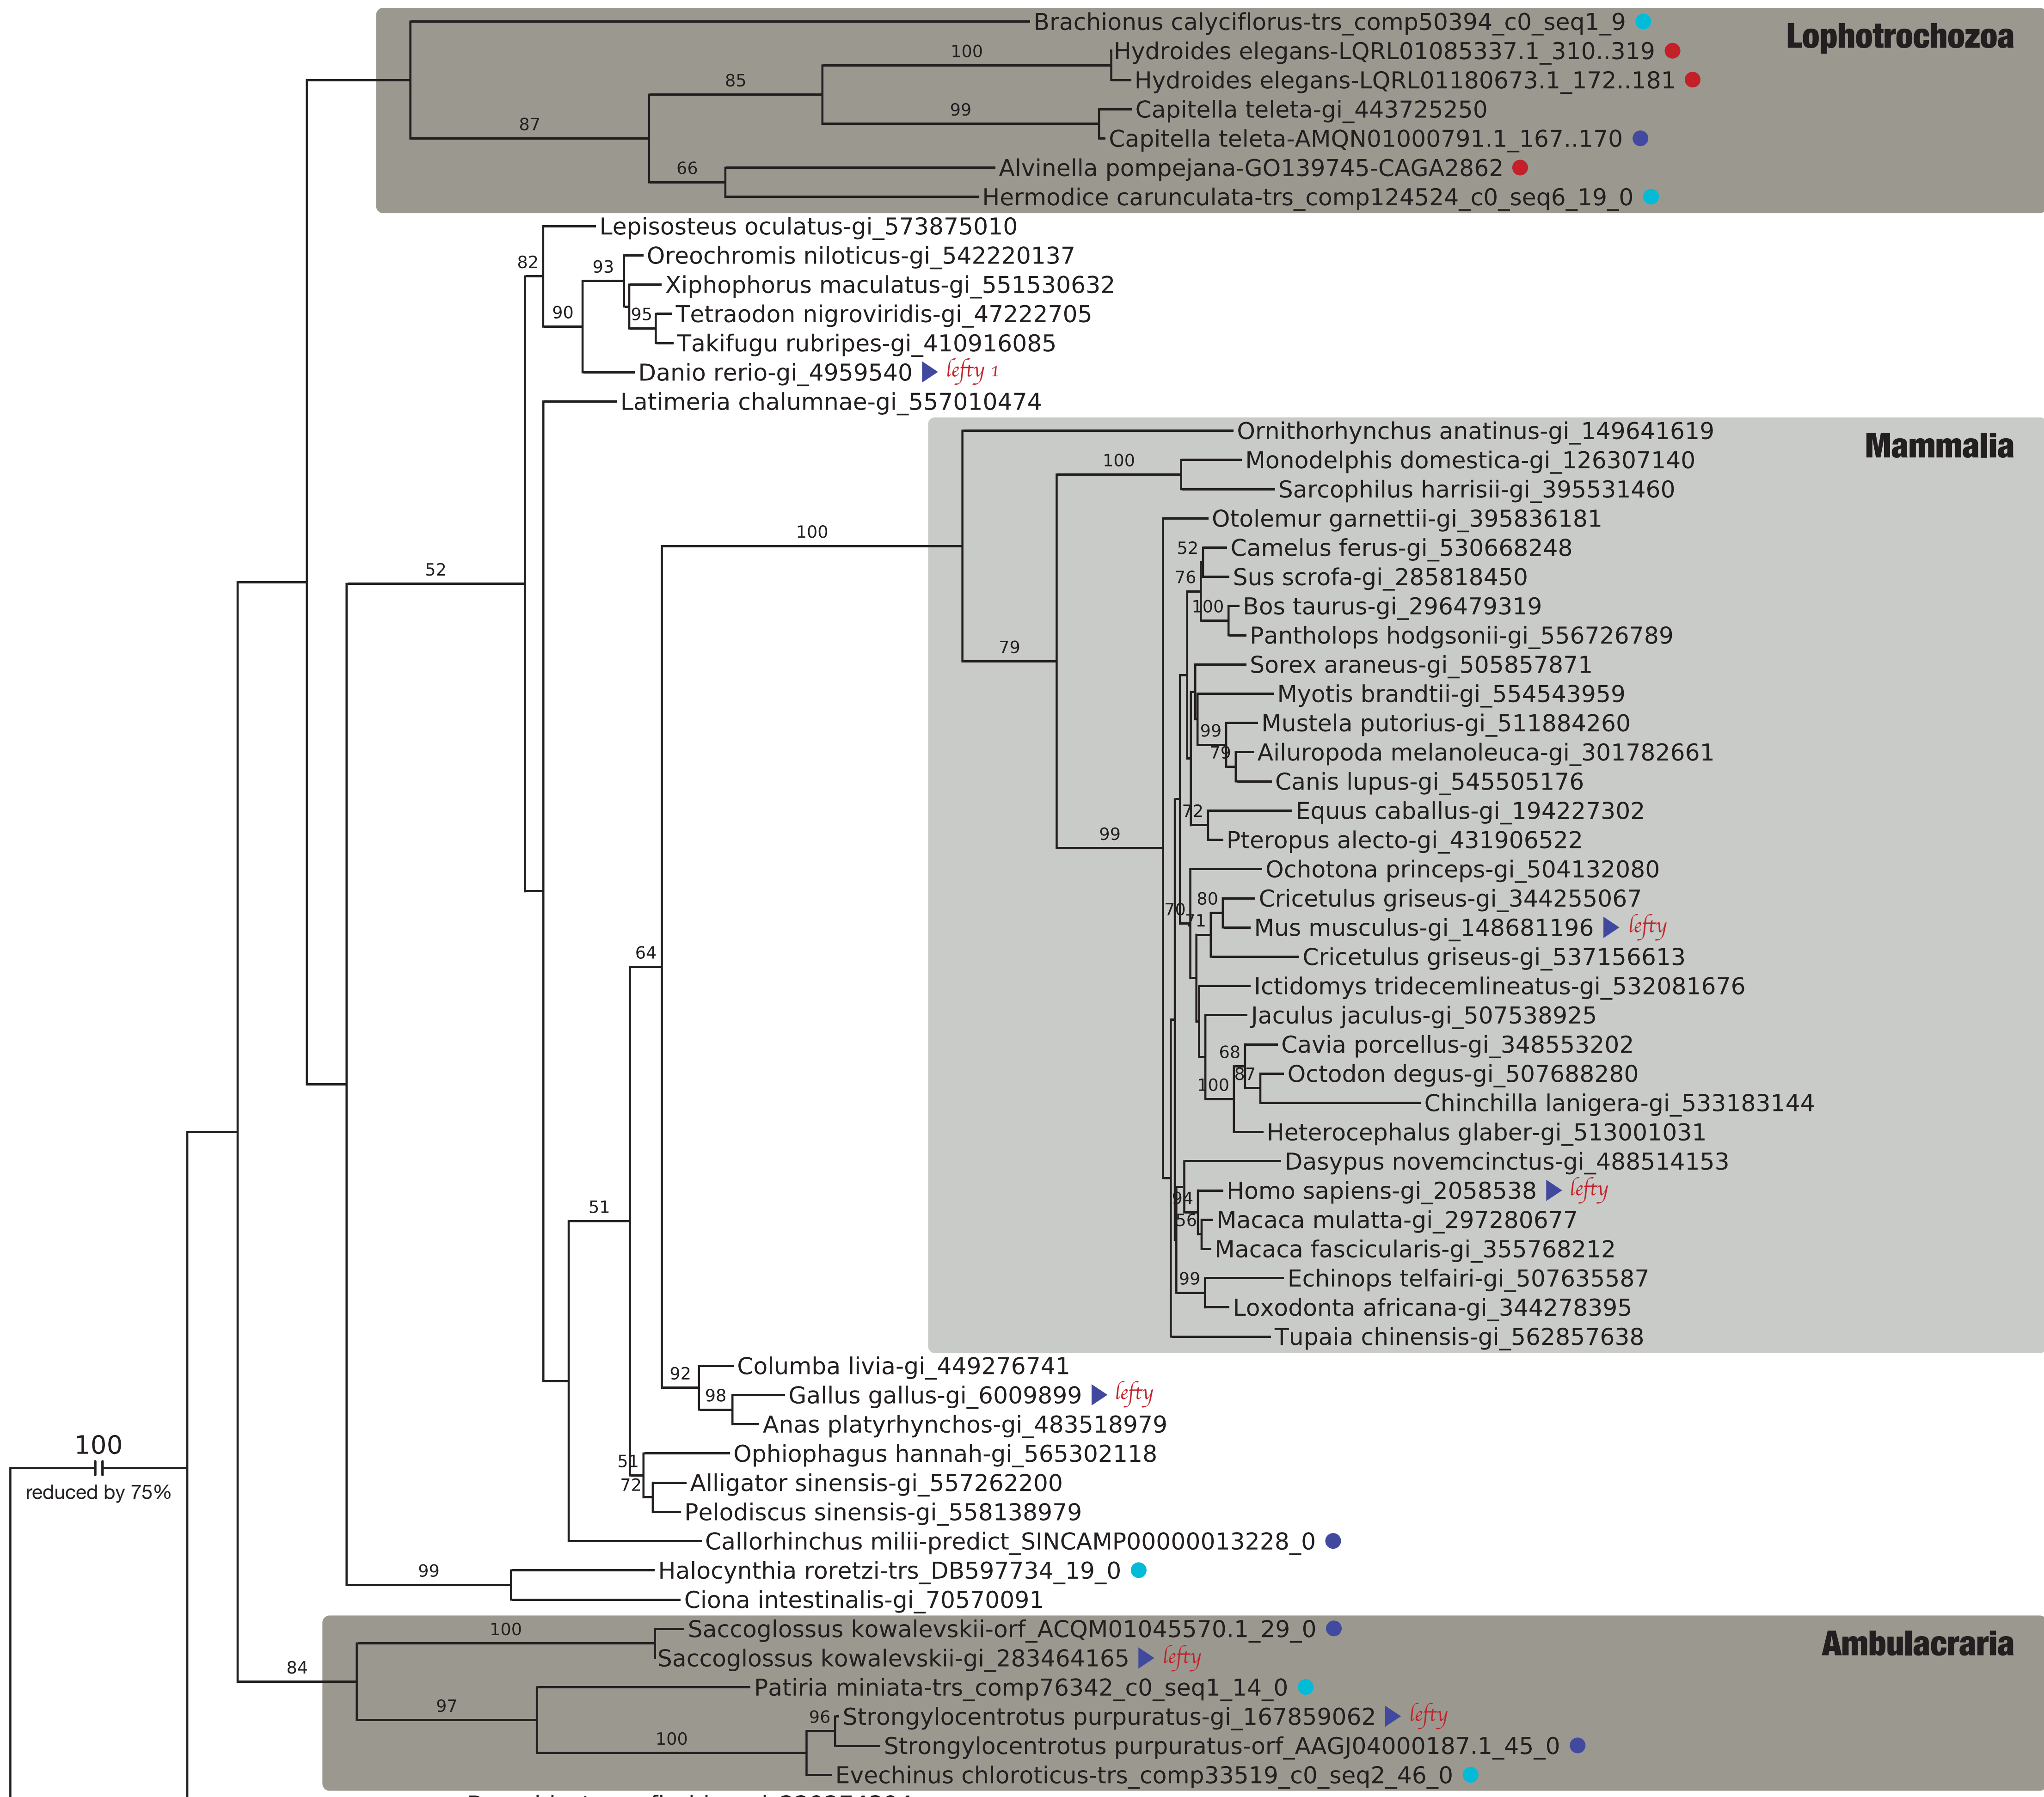

Lefty

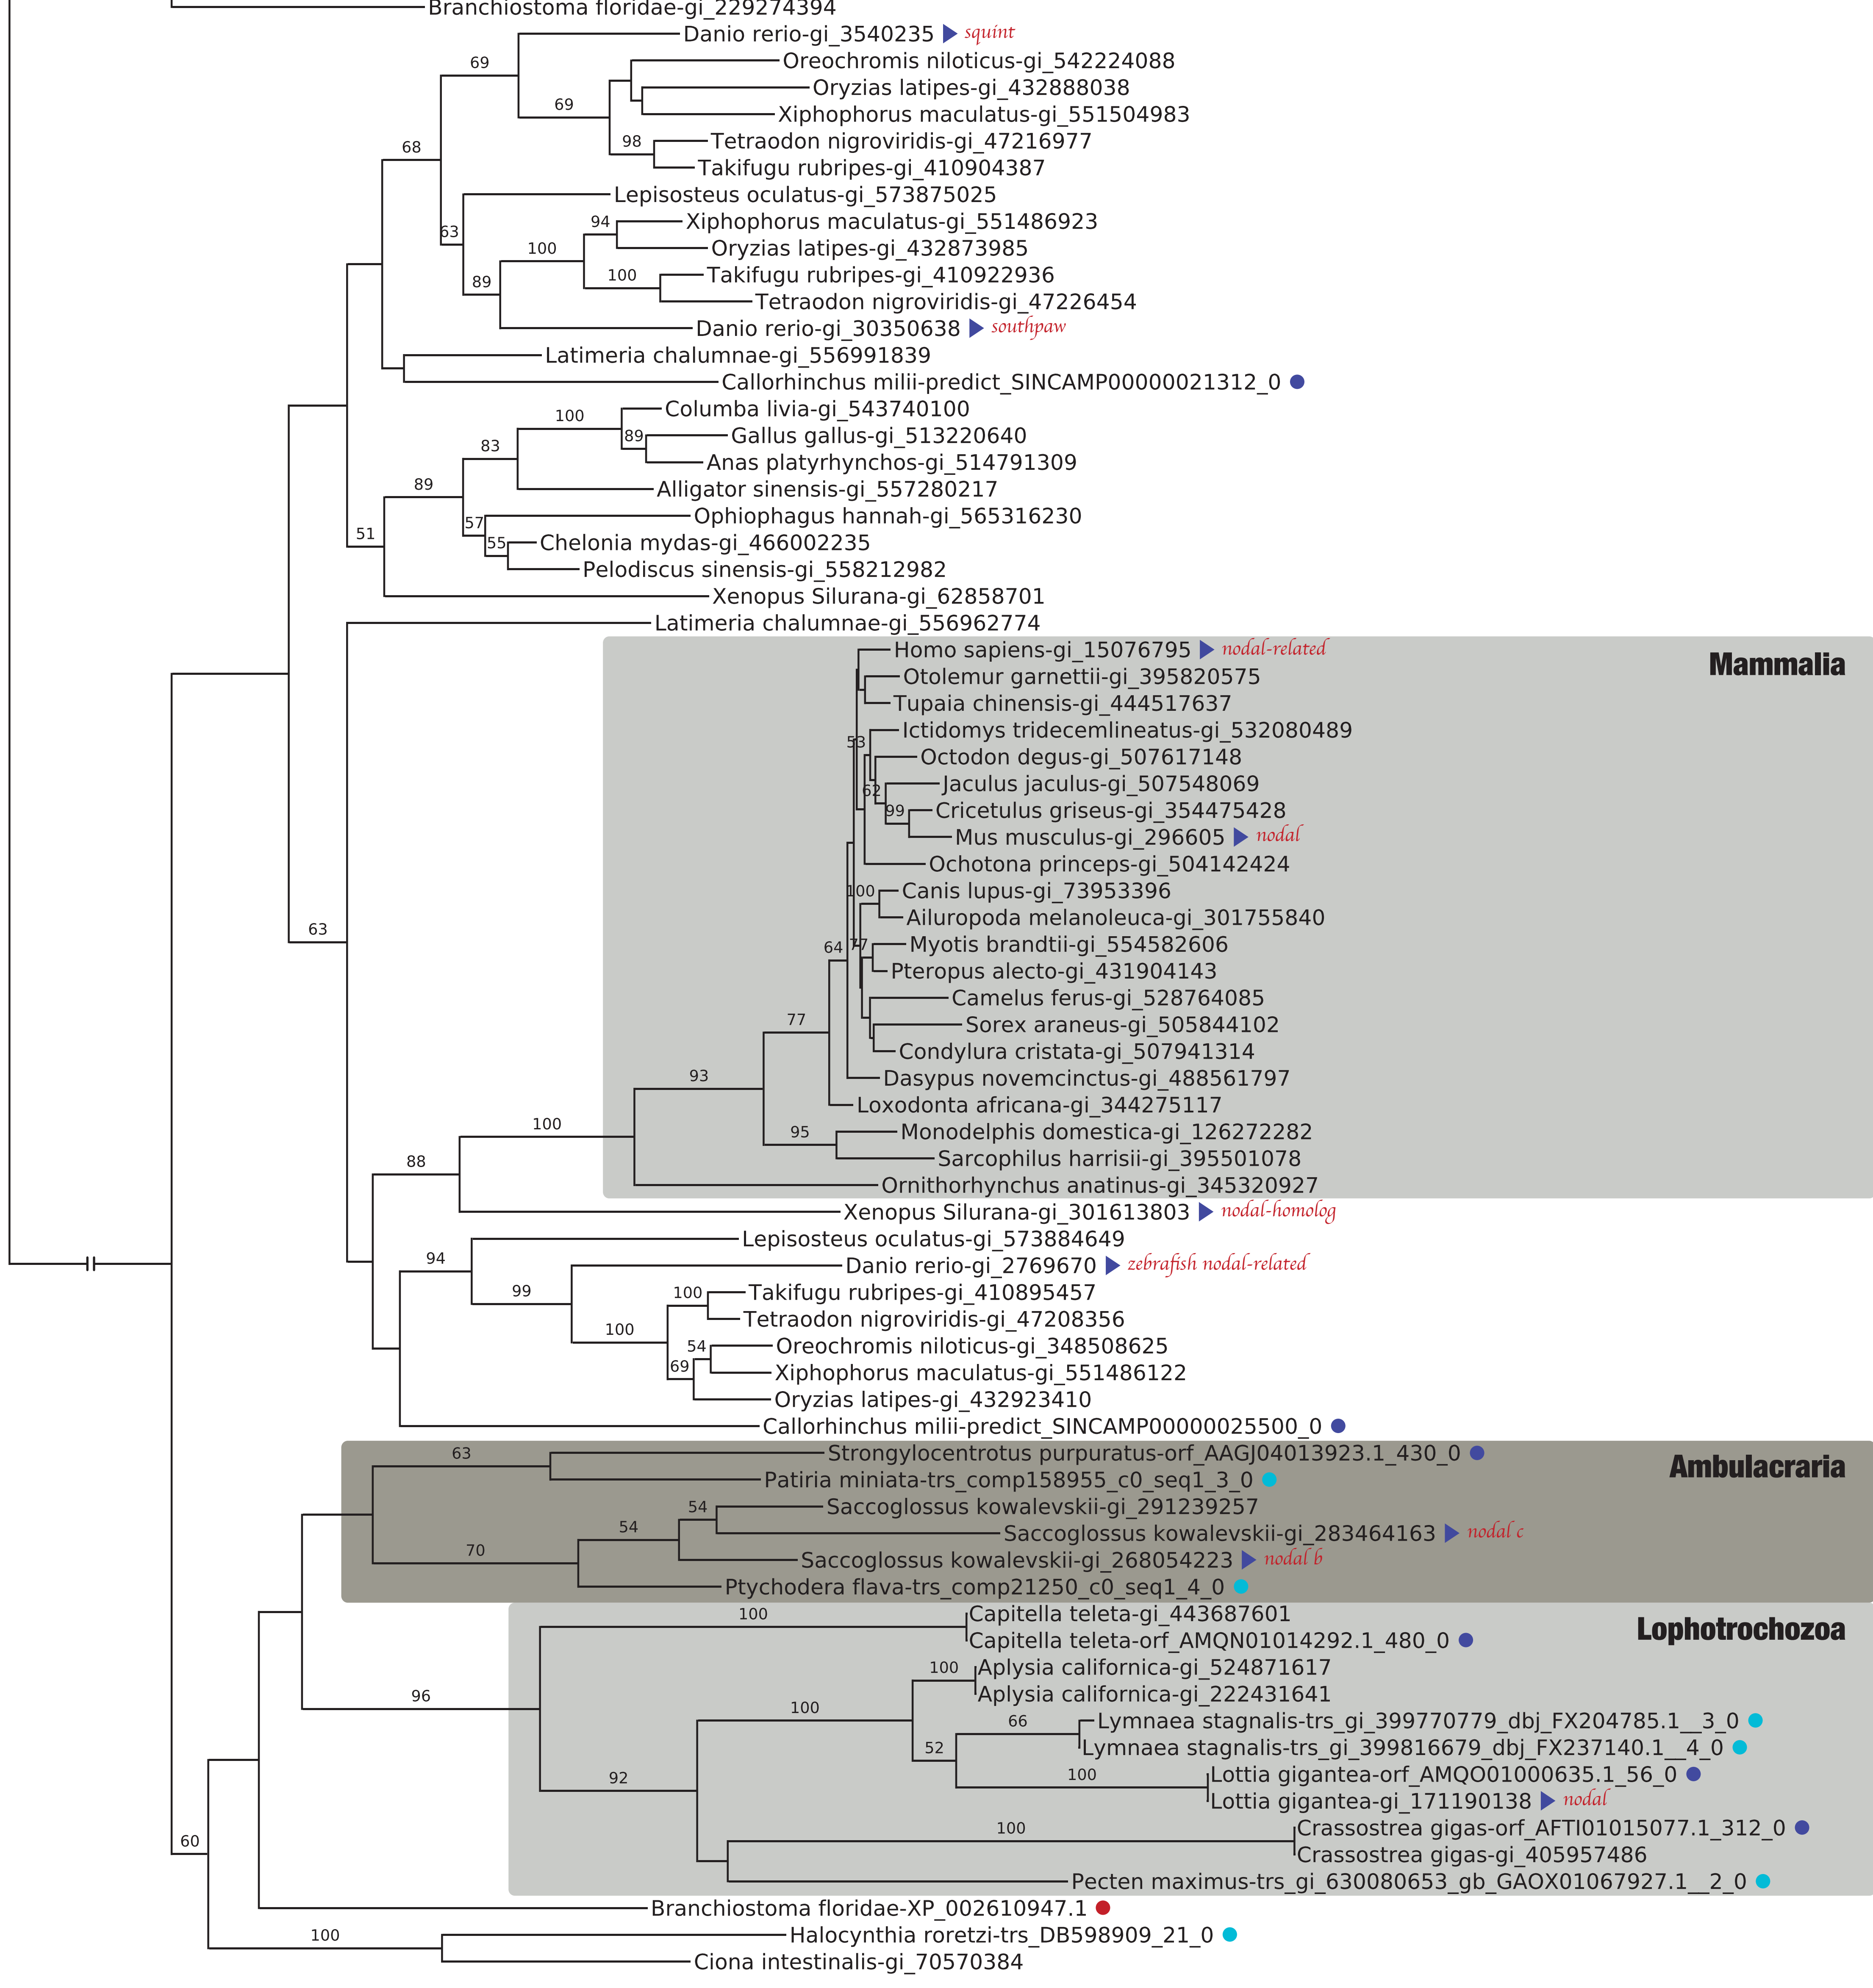

Nodal

Supplement: supp [file elife_poa_e45530_Figure_5_figure_supplement_2.pdf › elife_poa_e45530_Figure_5_figure_supplement_2.pdf]

# FoxQ1

Bilateria

non-Bilateria

# FoxH1

Vertebrata

Protost.

# FoxD

Bilateria

non-Bilateria

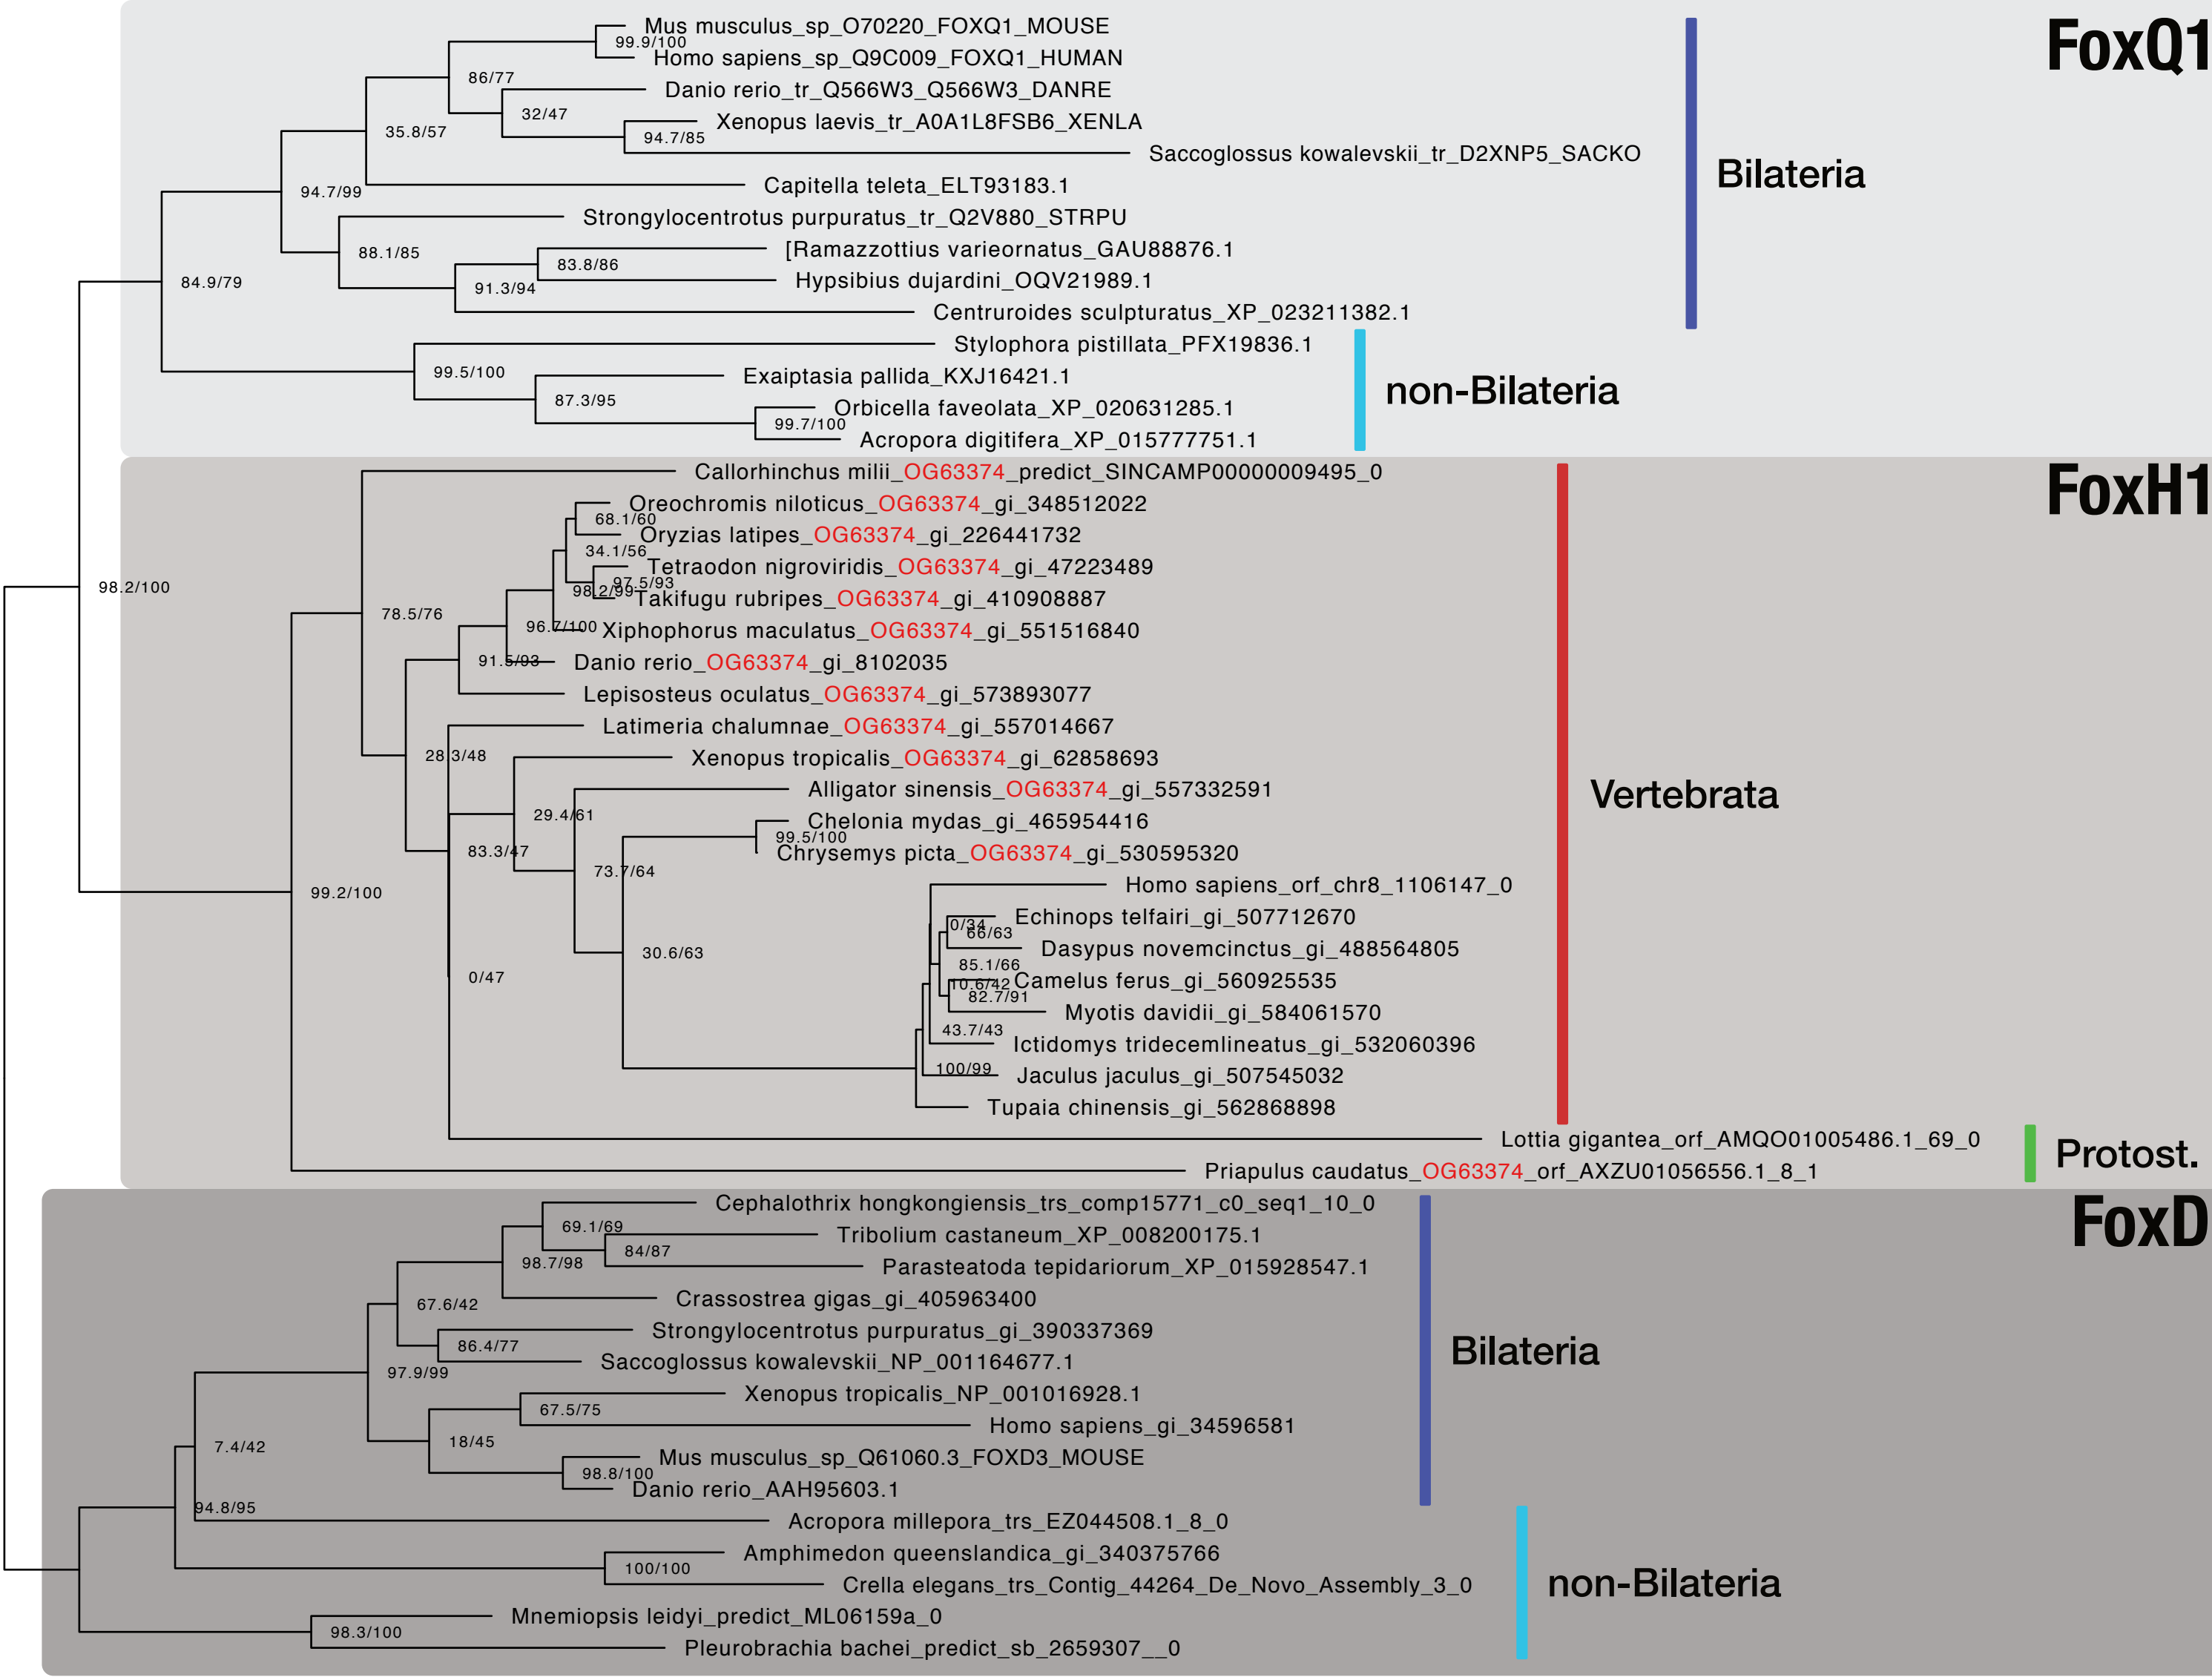

Supplement: supp [file elife_poa_e45530_Figure_5_figure_supplement_3.pdf › elife_poa_e45530_Figure_5_figure_supplement_3.pdf]

A

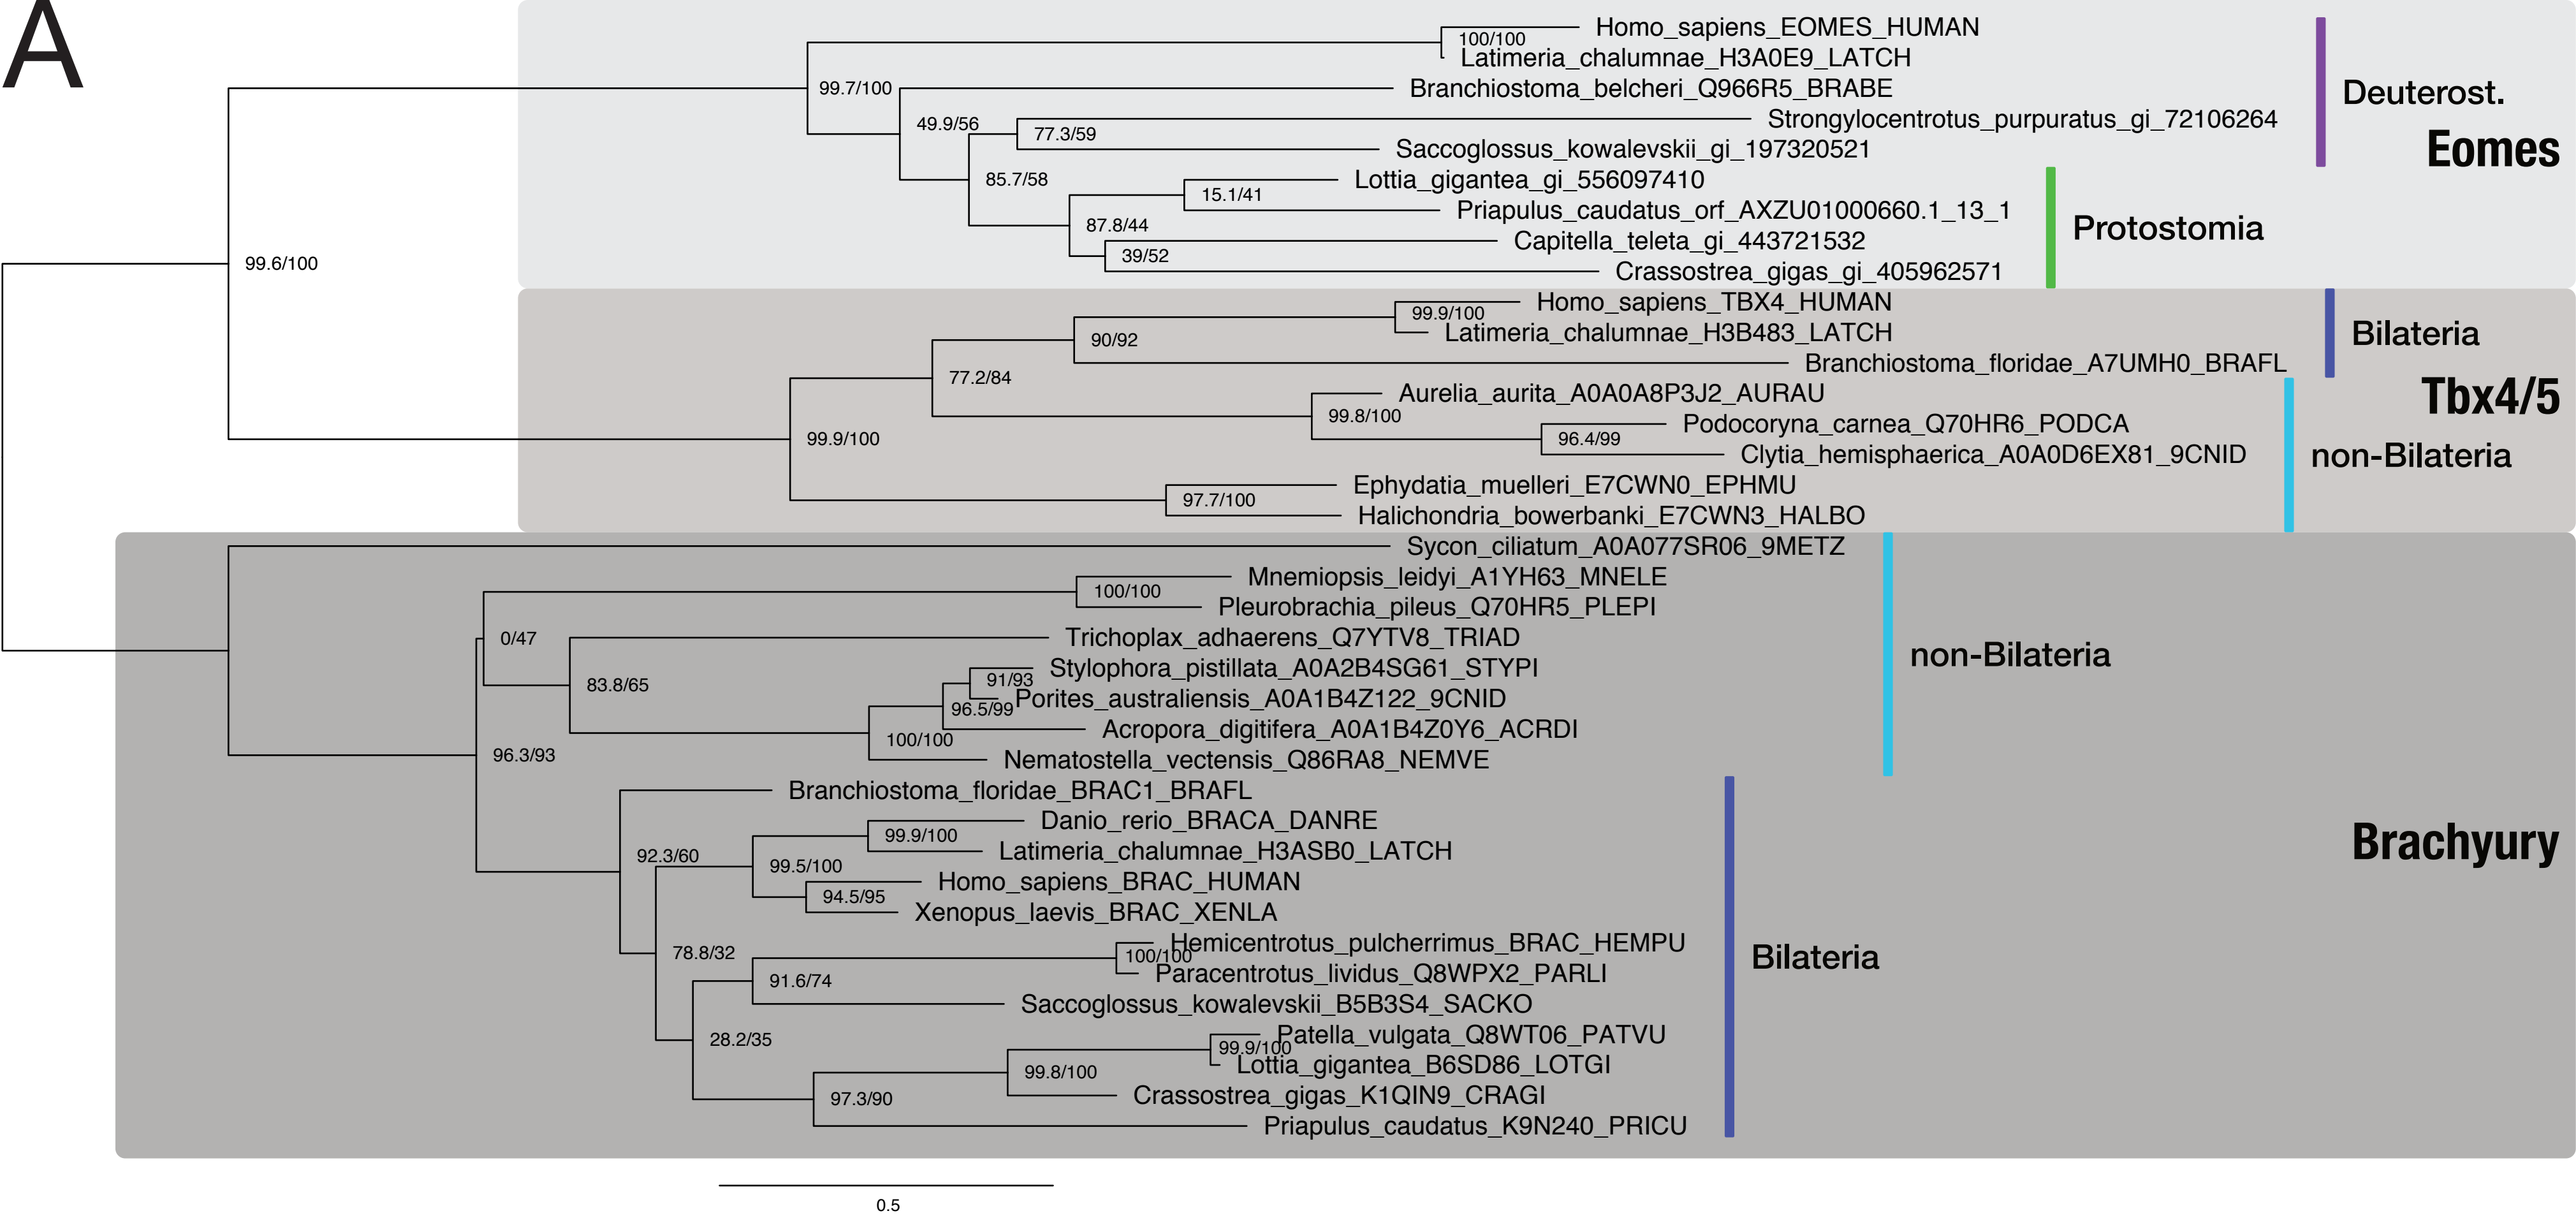

B

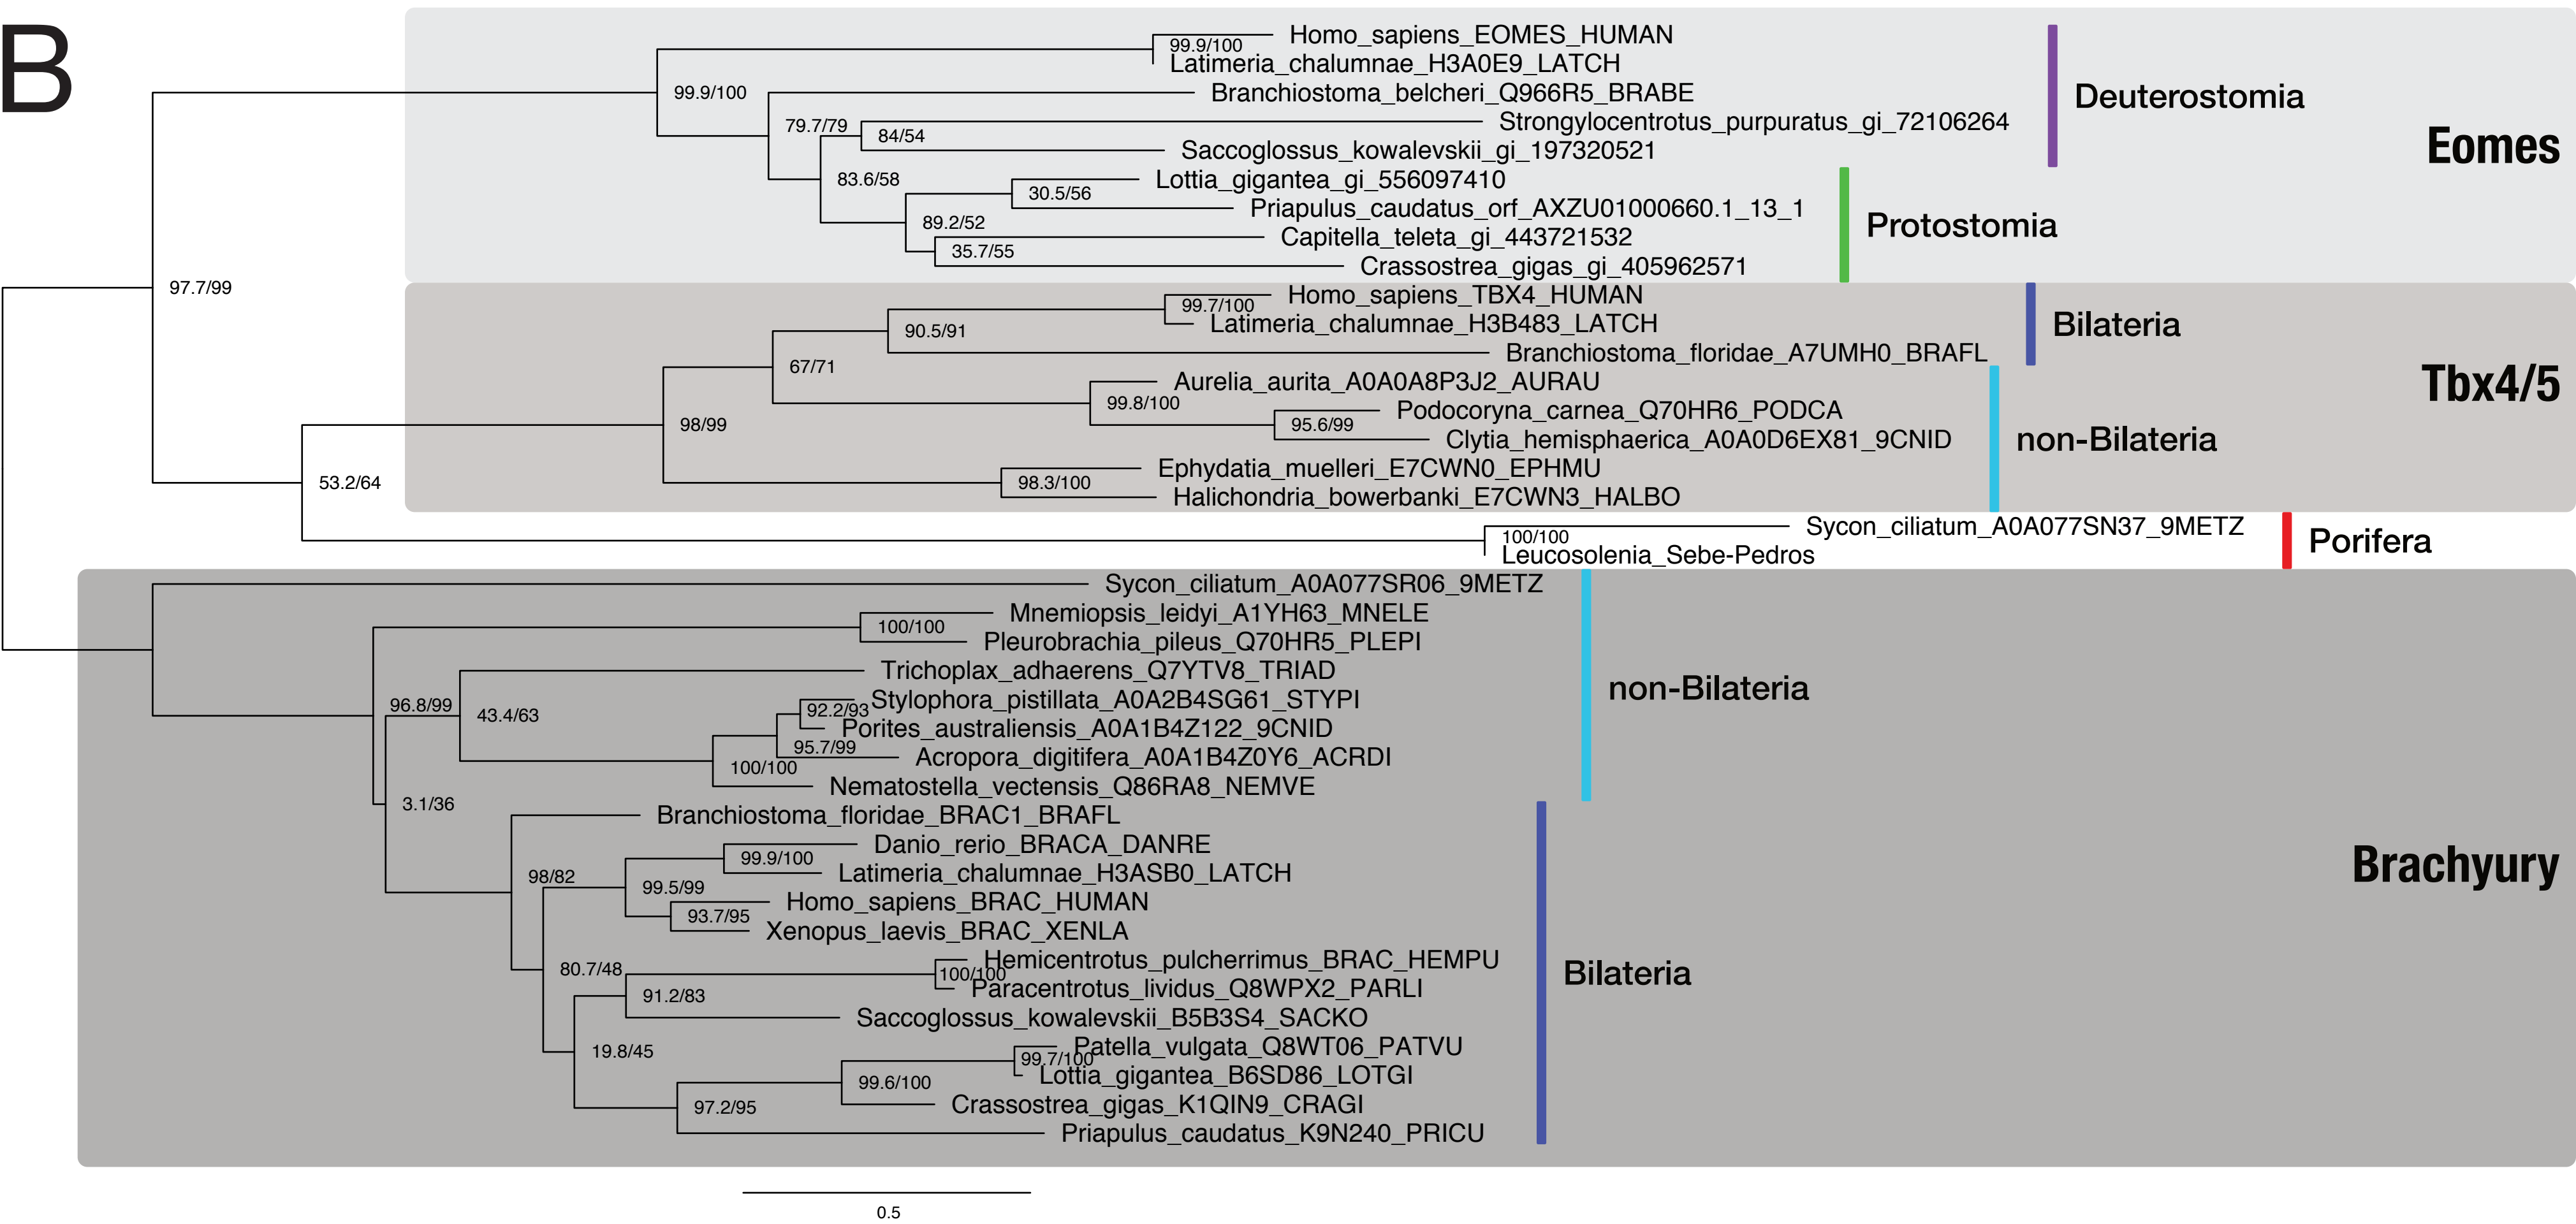

Supplement: supp [file elife_poa_e45530_Figure_5_figure_supplement_4.pdf › elife_poa_e45530_Figure_5_figure_supplement_4.pdf]

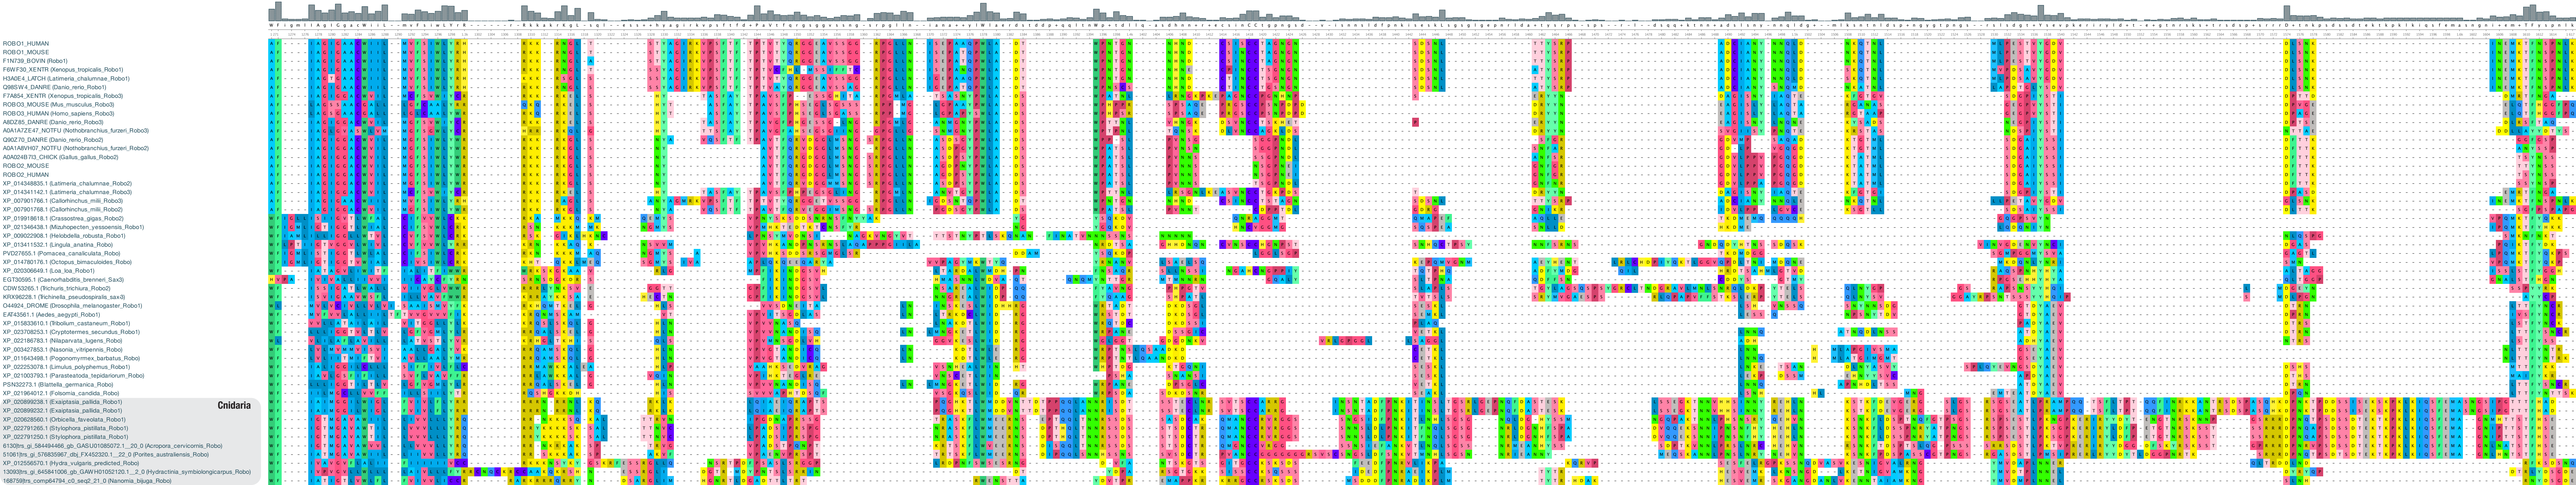

Supplement: supp [file elife_poa_e45530_Figure_6_figure_supplement_2.pdf › elife_poa_e45530_Figure_6_figure_supplement_2.pdf]

A

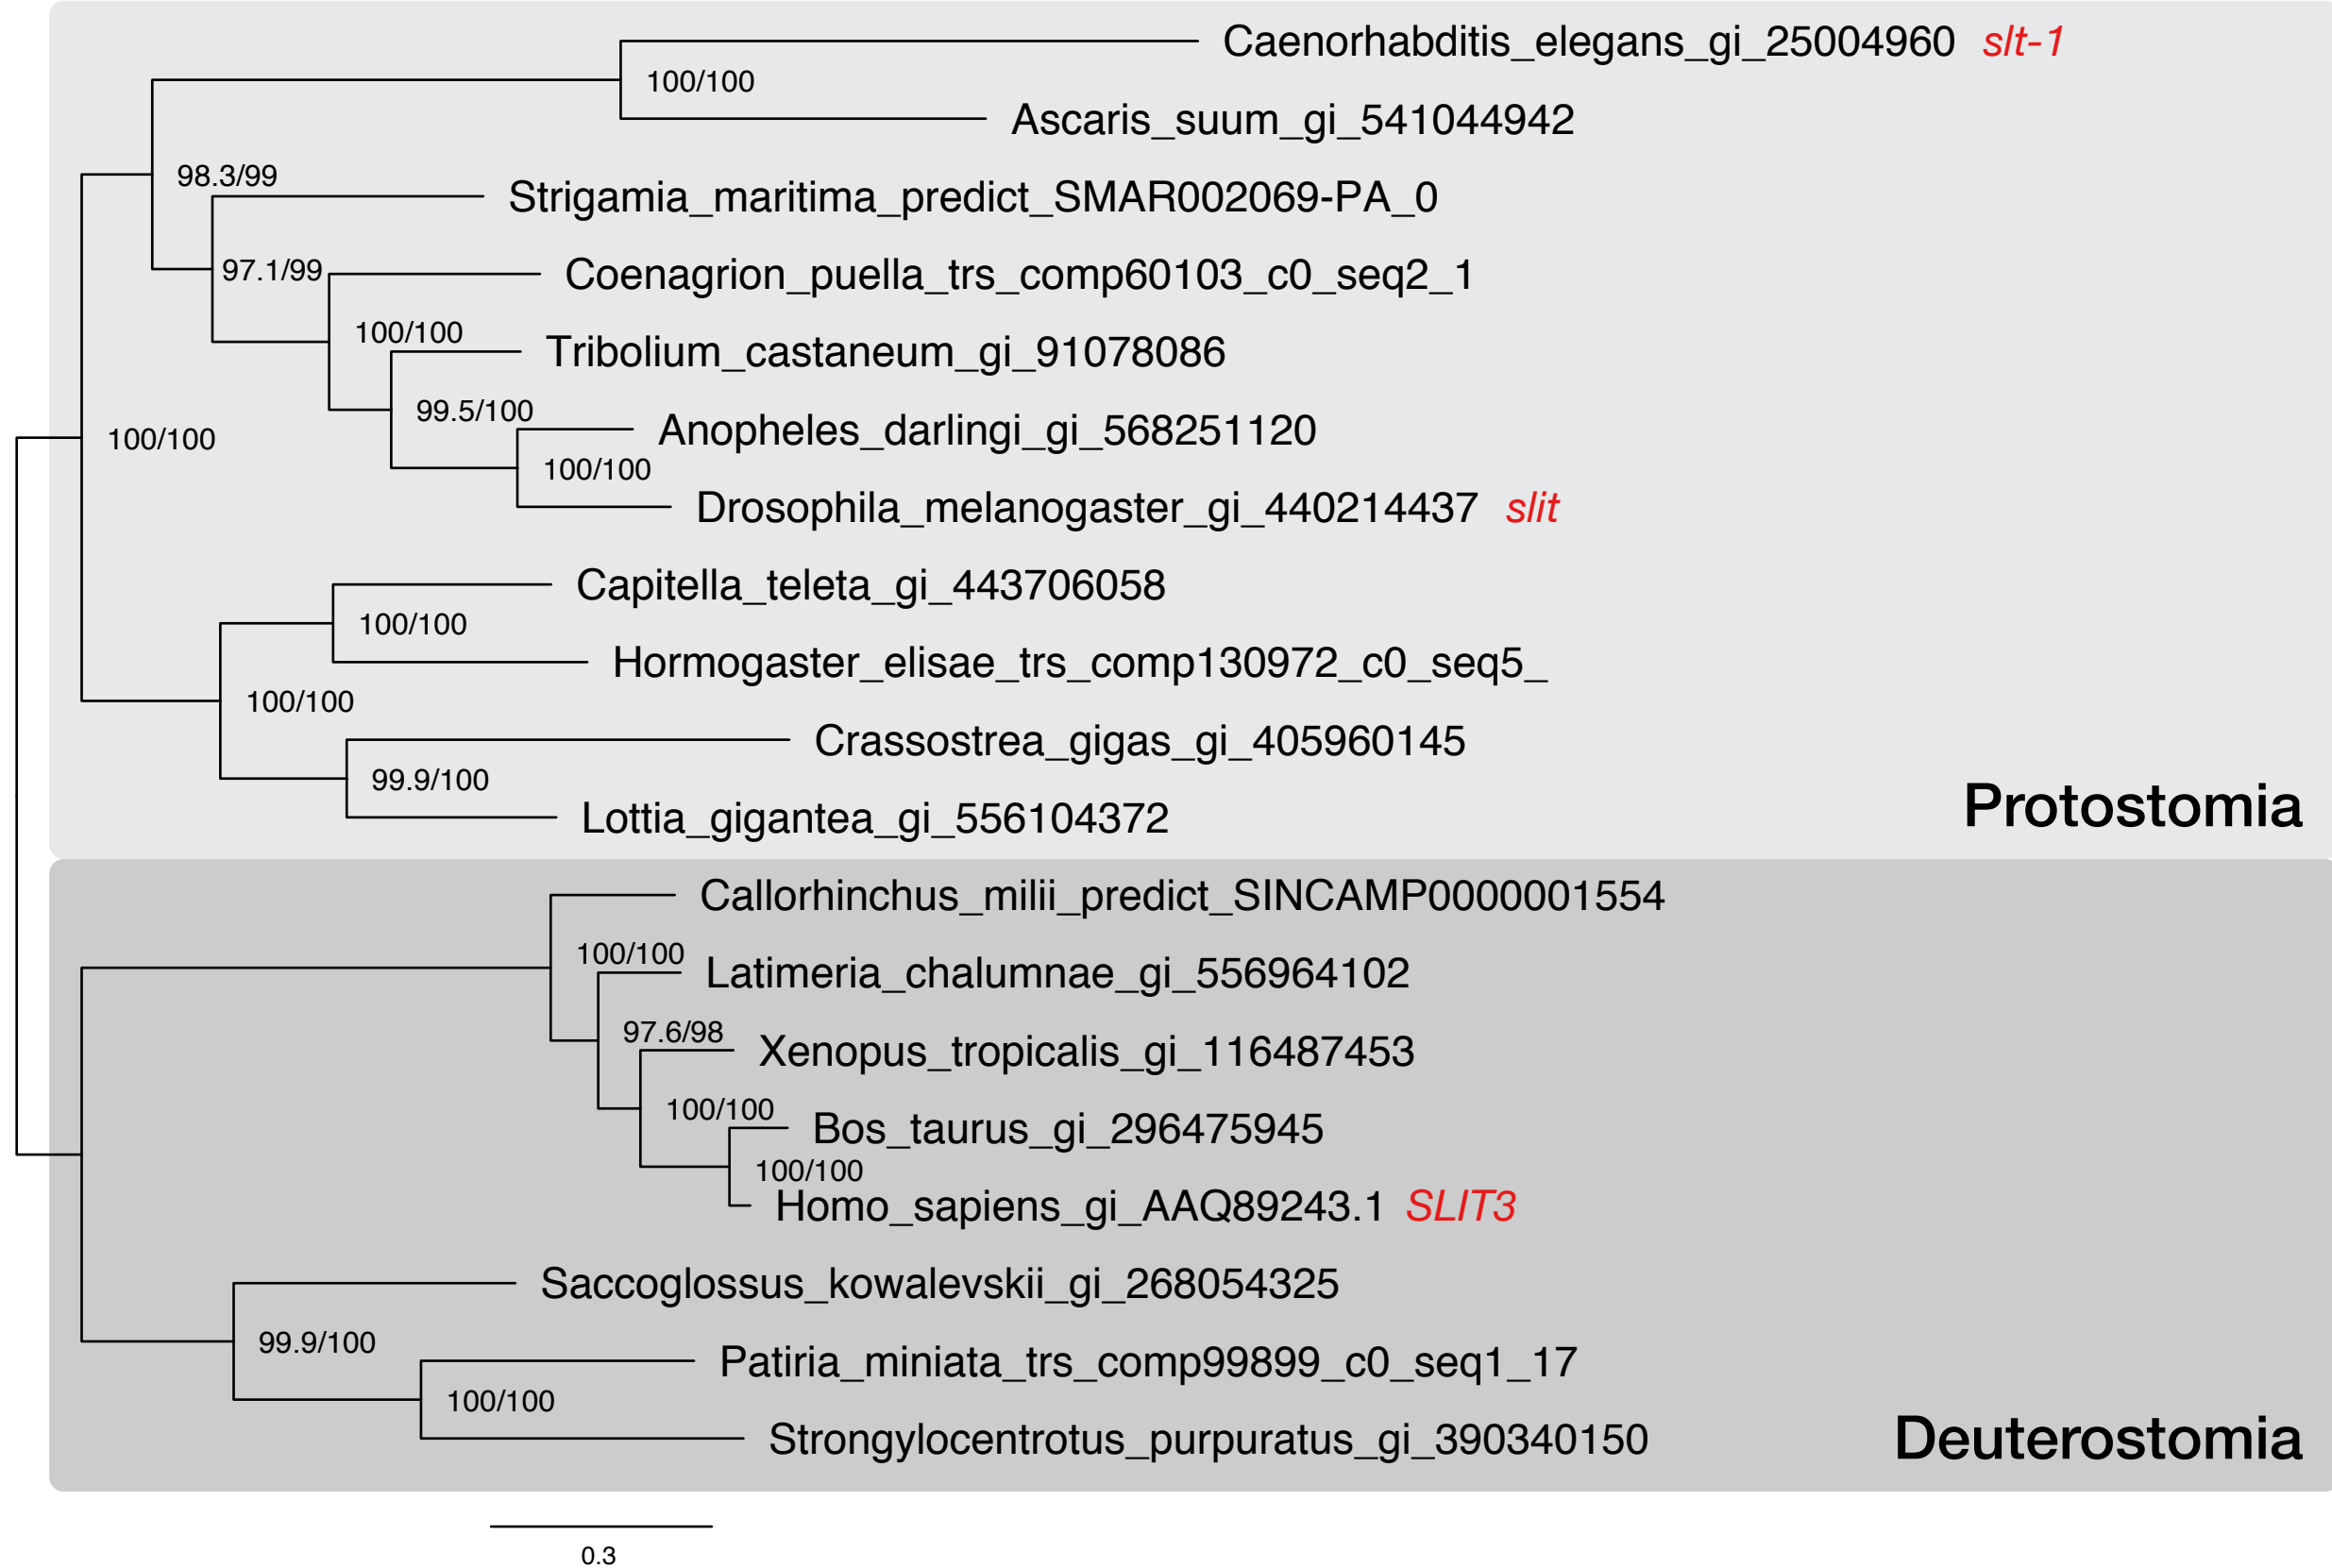

B

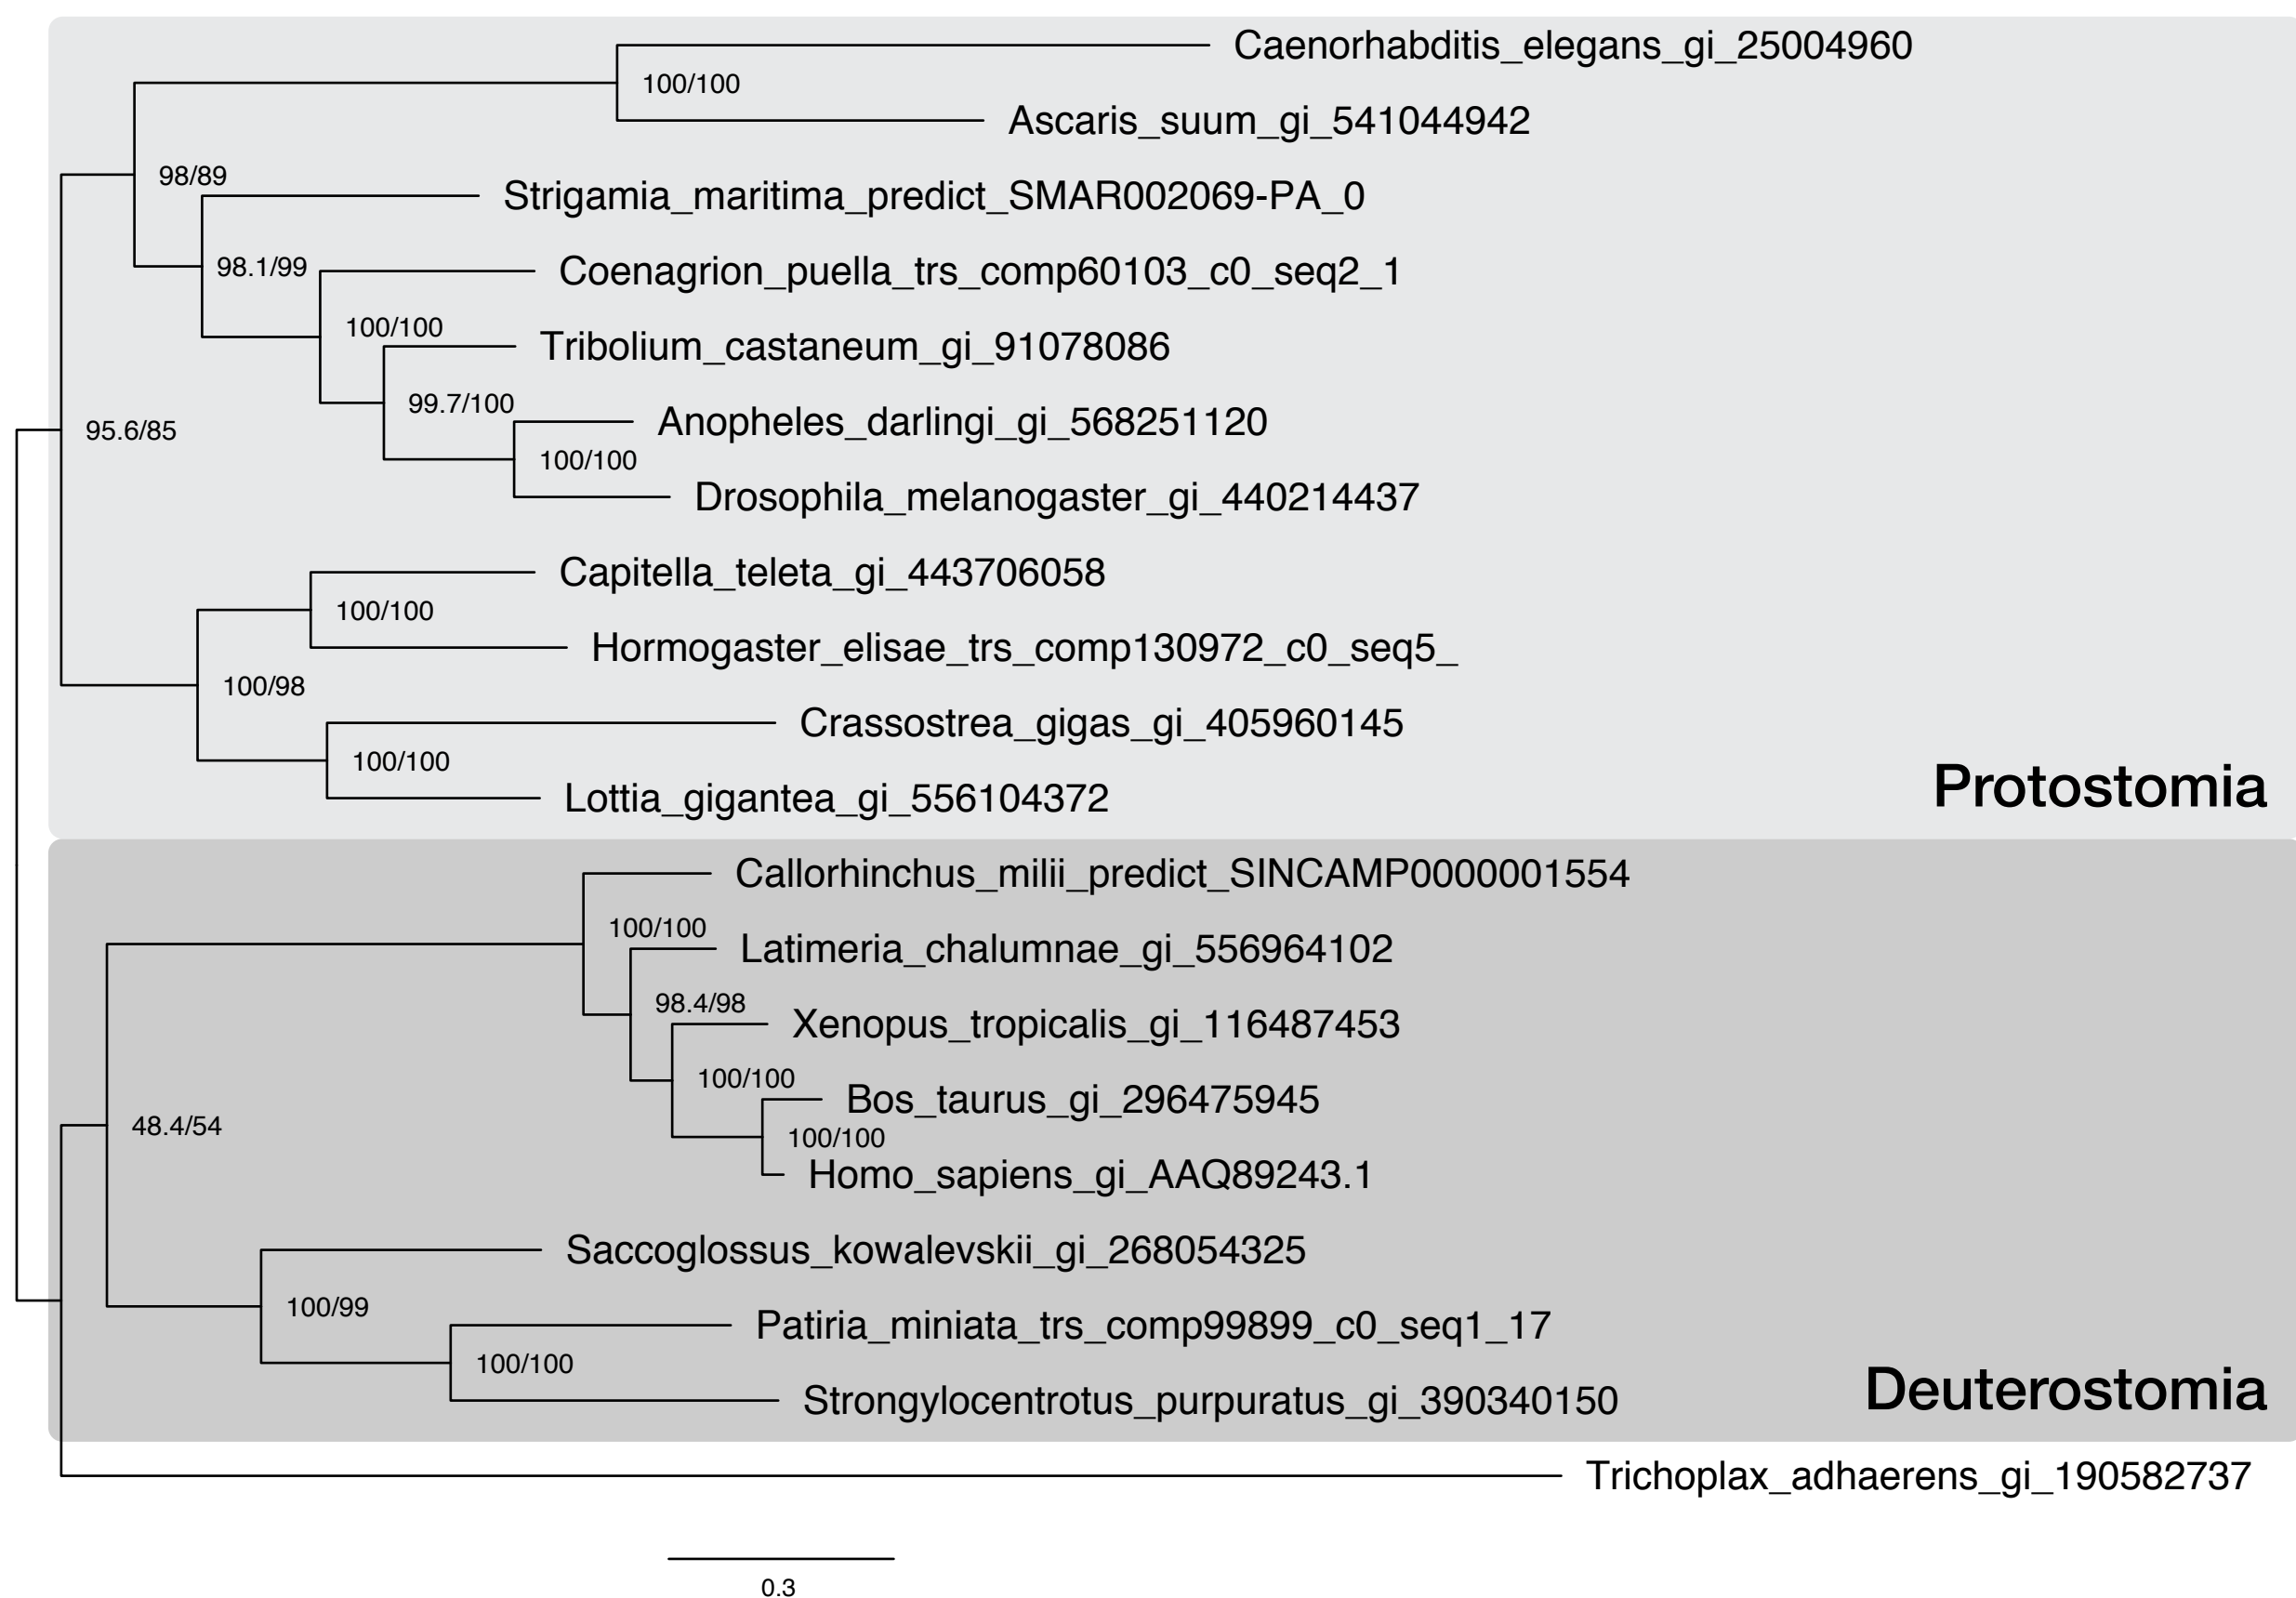

Supplement: supp [file elife_poa_e45530_Figure_6_figure_supplement_3.pdf › elife_poa_e45530_Figure_6_figure_supplement_3.pdf]

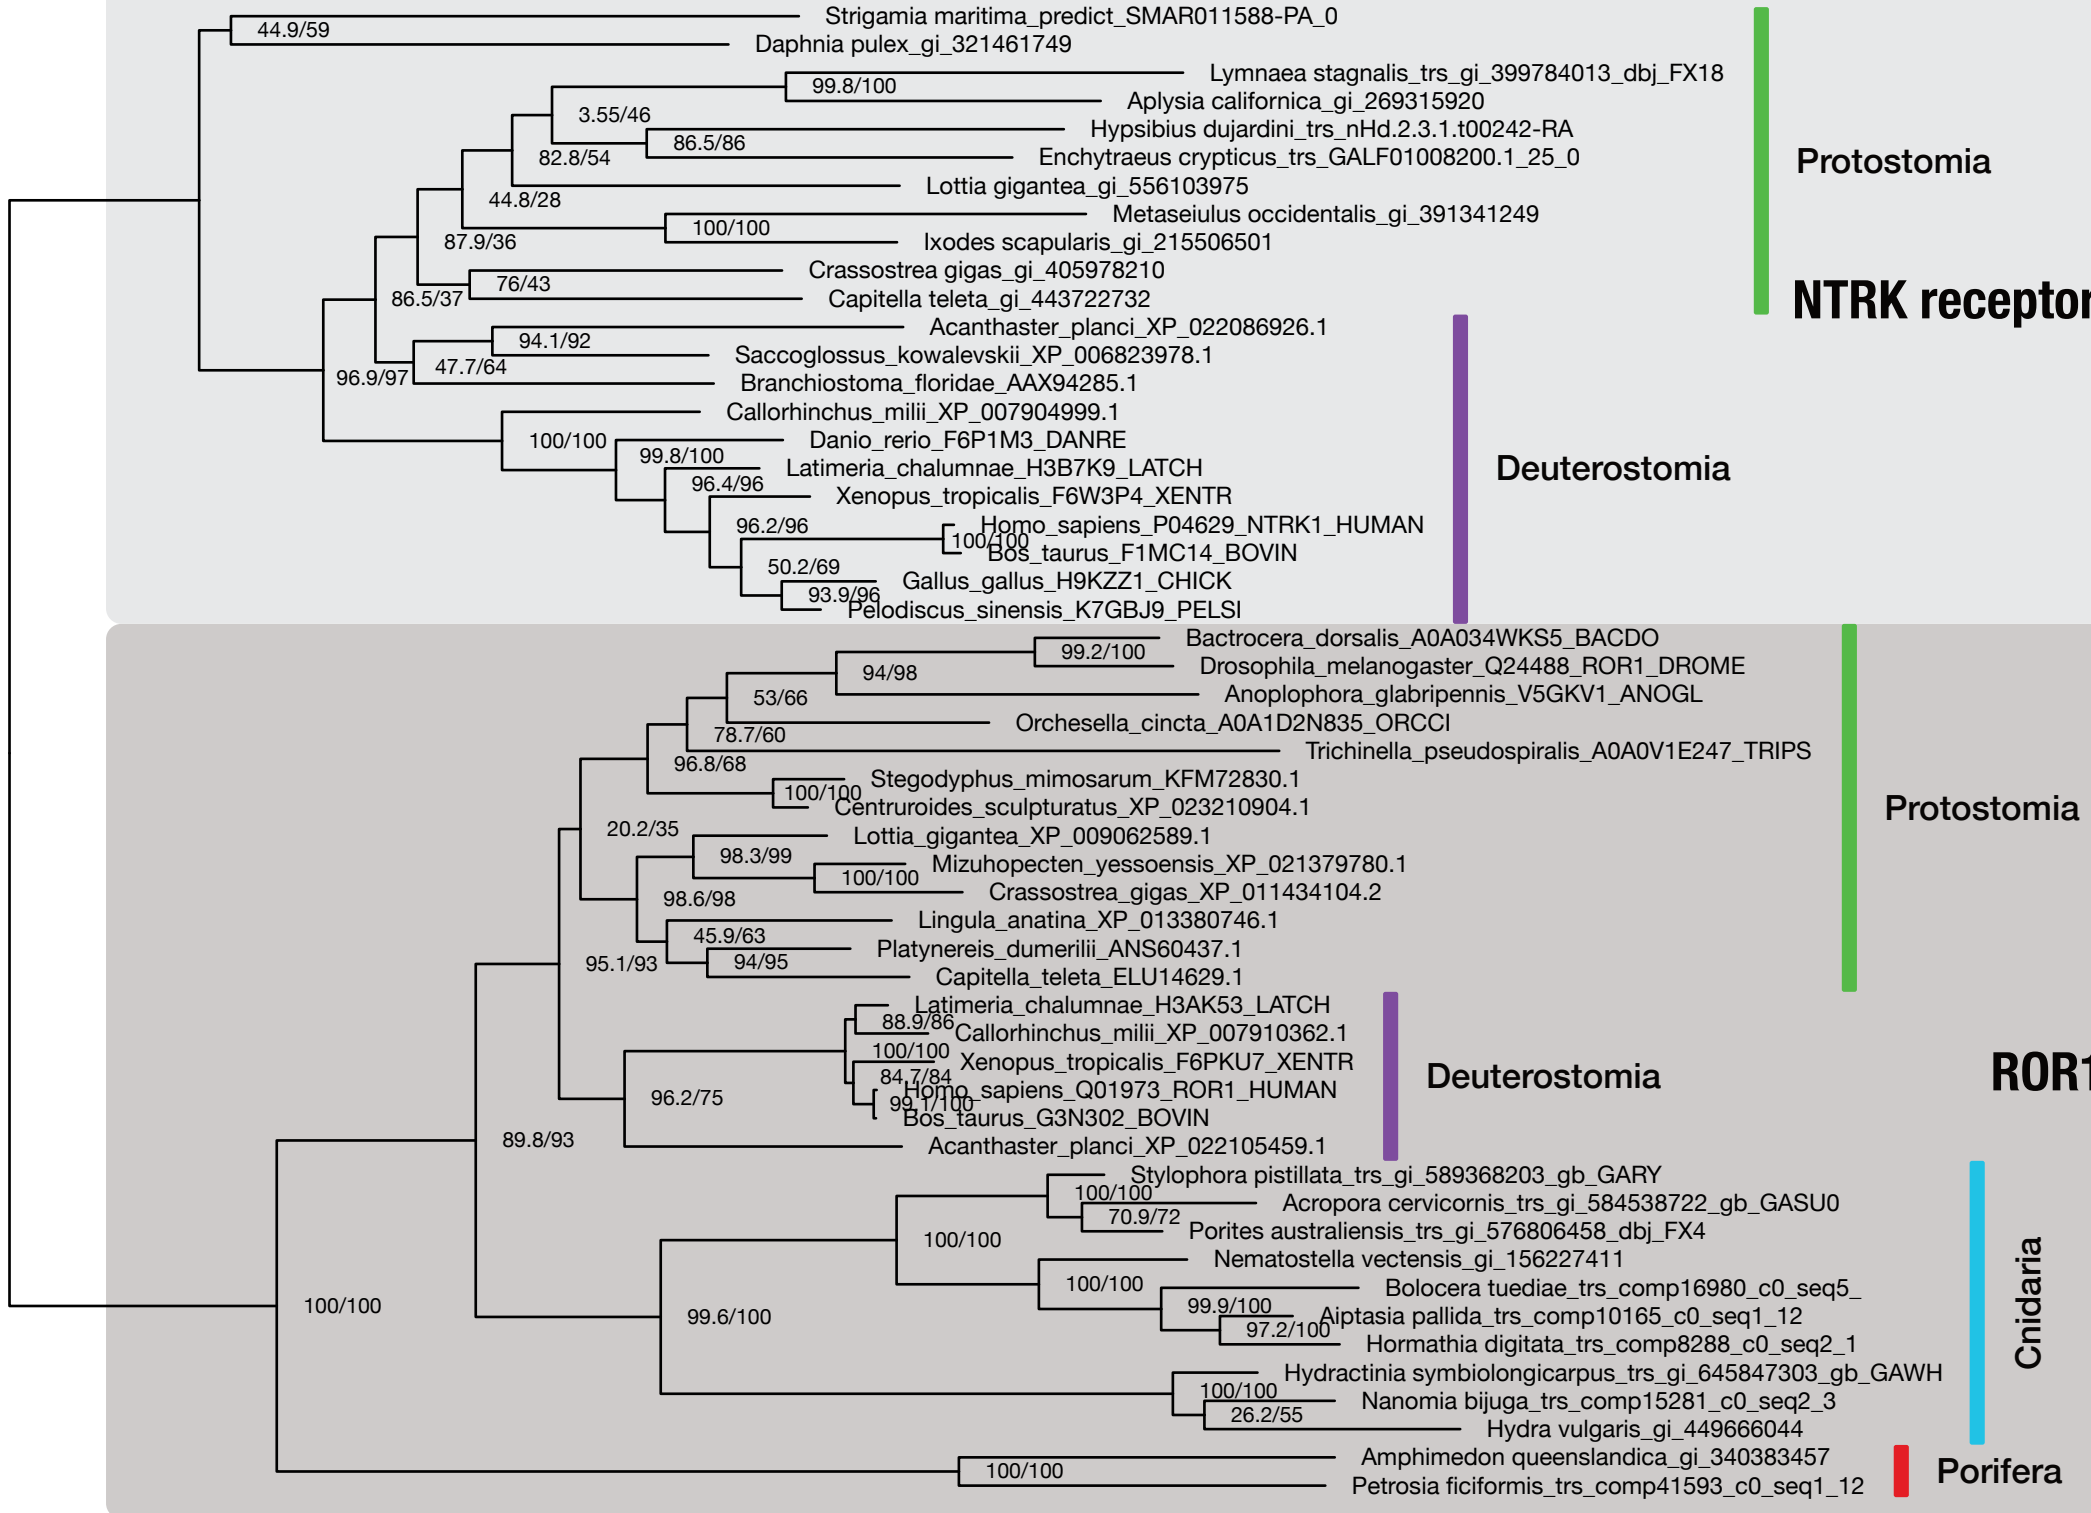

0.3

Supplement: supp [file elife_poa_e45530_Figure_7_figure_supplement_1.pdf › elife_poa_e45530_Figure_7_figure_supplement_1.pdf]
